# Supplementary material for: An efficient total synthesis of (+)-entecavir
Source: Royal Society of Chemistry journal article supplement (doi:10.1039/d5qo00329f), 2025-01-01

*Supporting Information*

**An Efficient Total Synthesis of (+)-Entecavir**

Chenlong Zhu, Nanlian Li, Yaopeng Ma and Bingfeng Sun\*

*School of Pharmaceutical Sciences, Nanjing Tech University, 30 South Puzhu Road, Nanjing, 210000*

email: [bfsun@njtech.edu.cn](mailto:bfsun@njtech.edu.cn)

**Table of Contents**

|             |                                                                                  |              |
|-------------|----------------------------------------------------------------------------------|--------------|
| <b>I.</b>   | <b>General Experimental Protocols .....</b>                                      | <b>2</b>     |
| <b>II.</b>  | <b>Experimental Procedures and Characterization Data for New Compounds .....</b> | <b>3</b>     |
| <b>III.</b> | <b>HPLC Data for (S)-4、(R)-4、3、2 and entecavir (1) .....</b>                     | <b>19–27</b> |
| <b>IV.</b>  | <b>References for the Supporting Information .....</b>                           | <b>28</b>    |
| <b>V.</b>   | <b>Copies of <sup>1</sup>H and <sup>13</sup>C NMR Spectra .....</b>              | <b>28–50</b> |
|             | <b>4 <sup>1</sup>H/<sup>13</sup>C.....</b>                                       | <b>29–30</b> |
|             | <b>6 <sup>1</sup>H/<sup>13</sup>C.....</b>                                       | <b>31–32</b> |
|             | <b>7 <sup>1</sup>H/<sup>13</sup>C.....</b>                                       | <b>33–34</b> |
|             | <b>3 <sup>1</sup>H/<sup>13</sup>C .....</b>                                      | <b>35–36</b> |
|             | <b>S1 <sup>1</sup>H/<sup>13</sup>C .....</b>                                     | <b>37–38</b> |
|             | <b>2 <sup>1</sup>H/<sup>13</sup>C .....</b>                                      | <b>39–40</b> |
|             | <b>8 <sup>1</sup>H/<sup>13</sup>C .....</b>                                      | <b>41–42</b> |
|             | <b>9 <sup>1</sup>H/<sup>13</sup>C.....</b>                                       | <b>43–44</b> |
|             | <b>10 <sup>1</sup>H/<sup>13</sup>C .....</b>                                     | <b>45–46</b> |
|             | <b>12 <sup>1</sup>H/<sup>13</sup>C .....</b>                                     | <b>47–48</b> |
|             | <b>1 <sup>1</sup>H/<sup>13</sup>C.....</b>                                       | <b>49–50</b> |

## I. General Experimental Protocols:

**Nuclear magnetic resonance (NMR) spectra** ( $^1\text{H}$  and  $^{13}\text{C}$ ) were recorded using a Bruker AX-400 spectrometer. Chemical shifts in  $^1\text{H}$  NMR spectra recorded in  $\text{CDCl}_3$  are referenced to  $\delta = 7.26$  or  $(\text{CD}_3)_2\text{SO}$  ( $\delta$  2.50) (Data are reported according to the following format: chemical shift (ppm) [multiplicity (e.g., s, d, t, q, etc.), coupling constant(s) (in Hz), integral value (to the nearest whole integer), and structural assignment of the proton]. Coupling constant values have been determined using reported methods.<sup>[1,2]</sup> Non-first order doubles are designated by 'nfod' and the apparent double coupling constant is indicated as  $J_{app}$ . Chemical shifts in  $^{13}\text{C}$  NMR spectra are referenced to the carbon atom of  $\text{CDCl}_3$  ( $\delta$  77.16) or  $(\text{CD}_3)_2\text{SO}$  ( $\delta$  39.60).

**Infrared (IR) spectra** were measured on a FT-IR spectrophotometer. The samples were placed on a diamond window as thin films (solids by evaporation from a  $\text{CH}_2\text{Cl}_2$  solution and liquids by direct deposition) and recorded in the attenuated total reflectance (ATR) mode. The absorption peak maxima are given in  $\text{cm}^{-1}$ .

**High-resolution mass spectrometry (HRMS)** measurements were obtained on a Waters Q-TOF Premier Spectrometer (ESI or EI Source).

**Optical rotation** was obtained from Rudolph Autopol II automatic polarimeter.

**Miscellaneous.** Reactions performed above the ambient laboratory temperature were performed in silicone oil baths that had been pre-equilibrated to the temperature of choice before the reaction vessel was immersed. Column chromatography was generally performed on silica gel (300-400 mesh). Reactions were monitored by thin layer chromatography (TLC) using UV light to visualize the course of the reactions and an ethanolic solution of phosphomolybdic acid, and heat as developing agents.

## II. Preparation Procedures and Characterization Data for All Compounds

### 4-((Tert-butyldimethylsilyl)oxy)cyclopent-2-en-1-one (*rac*-4)

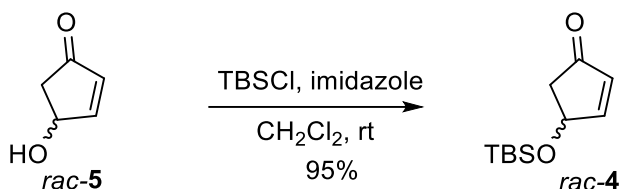

To a stirred solution of 4-hydroxy-2-cyclopentenone *rac*-5<sup>[3]</sup> (2.50 g, 25.51 mmol) in CH<sub>2</sub>Cl<sub>2</sub> (20 mL) were added tert-butyldimethylsilyl chloride (4.23 g, 28.06 mmol) and imidazole (2.08 g, 30.61 mmol) at room temperature. The resulting mixture was stirred at room temperature for 2 h before it was quenched by the addition of NaHCO<sub>3</sub> (20 mL, satd aq). The layers were separated and the aqueous layer was extracted with CH<sub>2</sub>Cl<sub>2</sub> (3x20 mL). The combined organic layers were washed with brine (20 mL), dried (Na<sub>2</sub>SO<sub>4</sub>), filtered and concentrated *in vacuo*. Flash column chromatography (silica gel, hexanes:EtOAc = 20:1) afforded *rac*-4 (5.14 g, 95%) as a colorless oil.

**<sup>1</sup>H NMR** (400 MHz, CDCl<sub>3</sub>): δ 7.43 (dd, *J* = 2.4, 5.7 Hz, 1H, COCH=CH), 6.14 (dd, *J* = 1.3, 5.7 Hz, 1H, COCH=CH), 4.96 (tdd, *J* = 1.4, 2.4, 6.0 Hz, 1H, CHOTBS), 2.68 (dd, *J* = 6.0, 18.2 Hz, 1H, COCH<sub>a</sub>H<sub>b</sub>), 2.20 (dd, *J* = 2.4, 18.2 Hz, 1H, COCH<sub>a</sub>H<sub>b</sub>), 0.88 [s, 9H, SiC(CH<sub>3</sub>)<sub>3</sub>], 0.11 [s, 3H, Si(CH<sub>3</sub>)<sub>2</sub>], and 0.09 [s, 3H, Si(CH<sub>3</sub>)<sub>2</sub>].

**<sup>13</sup>C NMR** (101 MHz, CDCl<sub>3</sub>): δ 206.4, 163.9, 124.4, 70.9, 44.9, 25.8, 18.1, -4.71, and -4.74.

**HRMS** (ESI) *m/z*: [M + H]<sup>+</sup> Calcd for C<sub>11</sub>H<sub>21</sub>O<sub>2</sub>Si<sup>+</sup> 213.1305; Found 213.1301.

**IR** (film): 2960, 2934, 2855, 1725, 1708, 1353, 1110, and 822 cm<sup>-1</sup>.

***Trans-4-((tert-butyldimethylsilyl)oxy)cyclopent-2-en-1-ol (rac-6)***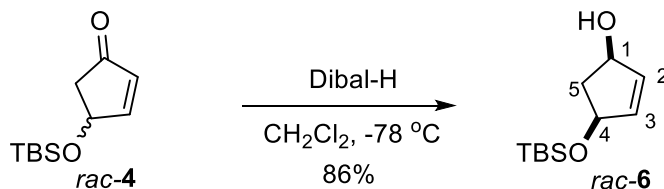

To a stirred solution of *rac-4* (2.17 g, 10.22 mmol) in CH<sub>2</sub>Cl<sub>2</sub> (100 mL) was dropwise added diisobutylaluminium hydride (1.0 mol/L in hexane) (12.2 mL, 12.2 mmol) at -78°C. The resulting mixture was stirred at -78°C for 2 h before it was quenched by the addition of potassium sodium tartrate tetrahydrate (60 mL, satd aq). The resulting mixture was stirred at room temperature for 30 min. The layers were separated and the aqueous layer was extracted with CH<sub>2</sub>Cl<sub>2</sub> (3x30 mL). The combined organic layers were dried (Na<sub>2</sub>SO<sub>4</sub>), filtered and concentrated *in vacuo*. Flash column chromatography (silica gel, hexanes:EtOAc = 5:1) afforded *rac-6* (1.89 g, 86%, dr>200:1, indicated in <sup>1</sup>HNMR) as a colorless oil.

**<sup>1</sup>H NMR** (400 MHz, CDCl<sub>3</sub>): δ 5.95 (dt, *J* = 5.7, 1.4 Hz, 1H, C<sub>3</sub>H), 5.89 (dt, *J* = 5.7, 1.5 Hz, 1H, C<sub>2</sub>H), 4.66-4.63 (m, 1H, C<sub>4</sub>H), 4.59-4.56 (m, 1H, C<sub>1</sub>H), 2.68 (dt, *J* = 14.0, 7.1 Hz, 1H, C<sub>5</sub>H<sub>a</sub>H<sub>b</sub>), 2.16 (dt, *J* = 8.8 Hz, 1H, OH), 1.50 (dt, *J* = 13.8, 4.5 Hz, 1H, C<sub>5</sub>H<sub>a</sub>H<sub>b</sub>), 0.89 (s, 9H, SiC(CH<sub>3</sub>)<sub>3</sub>), and 0.08 [s, 6H, Si(CH<sub>3</sub>)<sub>2</sub>].

**<sup>13</sup>C NMR** (101 MHz, CDCl<sub>3</sub>): δ 137.0, 135.8, 75.3, 75.2, 44.7, 26.0, 18.3, -4.53, and -4.55.

**HRMS** (ESI) *m/z*: [M + H]<sup>+</sup> Calcd for C<sub>11</sub>H<sub>23</sub>O<sub>2</sub>Si<sup>+</sup> 215.1462; Found 214.1465.

**IR** (film): 3340, 2952, 1640, 1472, 1251, and 1130 cm<sup>-1</sup>.

**(1*S*,4*R*)-4-((Tert-butyldimethylsilyl)oxy)cyclopent-2-en-1-yl acetate (7)**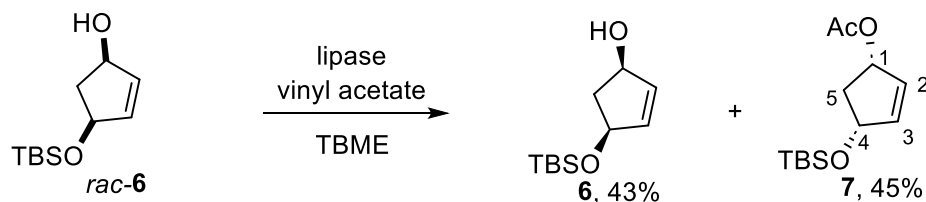

In a dry flask were added *rac*-**6** (1.35 g, 6.33 mmol), vinyl acetate (1.20 mL, 12.66 mmol), lipase (1.89 g, 20u/mg, 300 mg/mmol) and *tert*-butyl methyl ether (12 mL, 2 mL/mmol). The mixture was shaken at 150r in shaking table oscillator at 35°C for 36 h. The resulting mixture was filtered and concentrated *in vacuo*. Flash column chromatography (silica gel, hexanes:EtOAc = 20:1 to 5:1) afforded **6** (580 mg, 43%) and **7** (728 mg, 45%) as a colorless oil.

Data for **7**:

**<sup>1</sup>H NMR** (400 MHz, CDCl<sub>3</sub>): δ 5.97 (dt, *J* = 5.7, 1.4 Hz, 1H, C<sub>3</sub>H), 5.87 (dt, *J* = 5.7, 1.5 Hz, 1H, C<sub>2</sub>H), 5.45 (m, 1H, C<sub>1</sub>H), 4.71 (m, 1H, C<sub>4</sub>H), 2.80 (dt, *J* = 13.8, 7.3 Hz, 1H, C<sub>5</sub>H<sub>a</sub>H<sub>b</sub>), 2.04 (s, 3H, COCH<sub>3</sub>), 1.60 (dt, *J* = 13.8, 5.0 Hz, 1H, C<sub>5</sub>H<sub>a</sub>H<sub>b</sub>), 0.89 (s, 9H, SiC(CH<sub>3</sub>)<sub>3</sub>), 0.084 [s, 3H, Si(CH<sub>3</sub>)<sub>2</sub>], and 0.08 [s, 3H, Si(CH<sub>3</sub>)<sub>2</sub>].

**<sup>13</sup>C NMR** (101 MHz, CDCl<sub>3</sub>): δ 171.0, 139.0, 131.3, 77.1, 75.0, 41.3, 26.0, 21.3, 18.3, -4.5, and -4.6.

**HRMS** (ESI) *m/z*: [M + H]<sup>+</sup> Calcd for C<sub>13</sub>H<sub>25</sub>O<sub>3</sub>Si<sup>+</sup> 257.1567; Found 257.1563.

**IR** (film): 3062, 2980, 2930, 2865, 1738, 1708, 1352, 1100, and 986 cm<sup>-1</sup>.

**Specific Rotation for 6**: [α]<sub>D</sub><sup>25</sup> = -23.0° (*c* = 1.0, CHCl<sub>3</sub>).

**Specific Rotation for 7**: [α]<sub>D</sub><sup>25</sup> = +0.7° (*c* = 1.0, CHCl<sub>3</sub>).

**(1*S*,4*R*)-4-((Tert-butyldimethylsilyl)oxy)cyclopent-2-en-1-ol (*ent*-6)**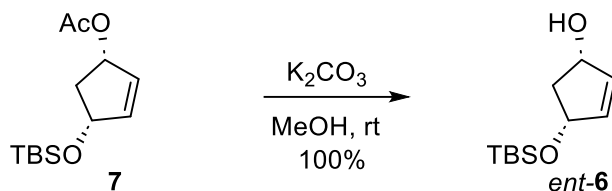

To a stirred solution of **7** (750 mg, 2.93 mmol) in MeOH (4 mL) was added  $K_2CO_3$  (606 mg, 4.40 mmol) at room temperature. The resulting mixture was stirred at room temperature for 1 h before it was quenched by the addition of  $NaHCO_3$  (10 mL, satd aq). The layers were separated and the aqueous layer was extracted with EtOAc (3x10 mL). The combined organic layers were washed with brine (20 mL), dried ( $Na_2SO_4$ ), filtered and concentrated *in vacuo*. Flash column chromatography (silica gel, hexanes:EtOAc = 5:1) afforded *ent*-**6** (625 mg, 100%) as a colorless oil.

**Specific Rotation for *ent*-6:**  $[\alpha]_D^{25} = +23.2^\circ$  ( $c = 1.0$ ,  $CHCl_3$ ).

**(S)-4-((Tert-butyldimethylsilyl)oxy)cyclopent-2-en-1-one ((S)-4)**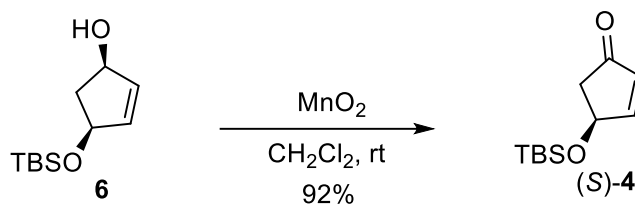

To a stirred solution of **6** (609 mg, 2.85 mmol) in CH<sub>2</sub>Cl<sub>2</sub> (8 mL) was added MnO<sub>2</sub> (2.47 g, 28.5 mmol) at room temperature. The resulting mixture was stirred at room temperature for 24 h, then diluted with CH<sub>2</sub>Cl<sub>2</sub> (5 mL). The reaction mixture was filtered through Celite and concentrated *in vacuo*. Flash column chromatography (silica gel, hexanes:EtOAc = 20:1) afforded (S)-**4** (557 mg, 92%) as a colorless solid.

(R)-**4** was synthesized from the *ent*-**6** as the same procedure as synthesis (S)-**4** and the yield is 89%.

**Specific Rotation for (S)-4:**  $[\alpha]_{\text{D}}^{25} = -54.0^\circ$  ( $c = 1.0$ , CHCl<sub>3</sub>).

**Specific Rotation for (R)-4:**  $[\alpha]_{\text{D}}^{25} = +52.6^\circ$  ( $c = 0.5$ , CHCl<sub>3</sub>).

**(S)-4-((Tert-butyldimethylsilyl)oxy)-2-(hydroxymethyl)cyclopent-2-en-1-one (3)**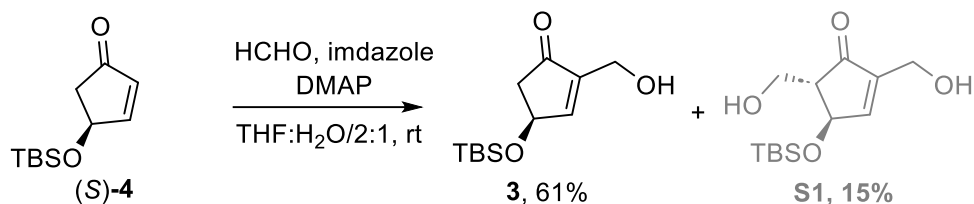

To a stirred solution of (S)-4 (2.00 g, 9.42 mmol) in mixture of THF (6 mL) and H<sub>2</sub>O (3 mL) were added HCHO (37% w/w aqueous solution, 3.8 mL, 47.1 mmol), imidazole (320 mg, 4.72 mmol) and DMAP (1.15 g, 9.42 mmol). The resulting mixture was stirred at room temperature for 2 h before it was quenched by the addition of NaHCO<sub>3</sub> (10 mL, satd aq). The layers were separated and the aqueous layer was extracted with CH<sub>2</sub>Cl<sub>2</sub> (3x15 mL). The combined organic layers were washed with brine (15 mL), dried (Na<sub>2</sub>SO<sub>4</sub>), filtered and concentrated *in vacuo*. Flash column chromatography (silica gel, hexanes:EtOAc = 4:1) afforded the **3** (1.40 g, 61%, 70% brsm) followed by the slower eluting **S1** (380 mg, 15%) as a colorless oil.

**<sup>1</sup>H NMR** (400 MHz, CDCl<sub>3</sub>): δ 7.27-7.25 (m, 1H, COC=CH), 4.95-4.91 (m, 1H, CHOTBS), 4.37 (m, 2H, CH<sub>2</sub>OH), 2.78 (dd, *J* = 5.9, 18.4 Hz, 1H, COCH<sub>a</sub>H<sub>b</sub>), 2.35 (brs, 1H, CH<sub>2</sub>OH), 2.34 (dd, *J* = 2.2, 18.4 Hz, 1H, COCH<sub>a</sub>H<sub>b</sub>), 0.90 [s, 9H, SiC(CH<sub>3</sub>)<sub>3</sub>], 0.12 [s, 3H, Si(CH<sub>3</sub>)<sub>2</sub>], and 0.11 [s, 3H, Si(CH<sub>3</sub>)<sub>2</sub>].

**<sup>13</sup>C NMR** (101 MHz, CDCl<sub>3</sub>): δ 206.2, 157.7, 145.7, 69.2, 57.4, 46.0, 25.9, 18.2, -4.64, and -4.65.

**HRMS** (ESI) *m/z*: [M + H]<sup>+</sup> Calcd for C<sub>12</sub>H<sub>23</sub>O<sub>3</sub>Si<sup>+</sup> 243.1411; Found 243.1415.

**IR** (film): 3435 (broad), 2954, 2927, 2856m 1711m, 1251, and 1081 cm<sup>-1</sup>.

**Specific Rotation**: [α]<sub>D</sub><sup>25</sup> = -39.7° (*c* = 1.0, CHCl<sub>3</sub>).



**(4*R*,5*S*)-4-((Tert-butyldimethylsilyl)oxy)-2,5-bis(hydroxymethyl)cyclopent-2-en-1-one (S1)**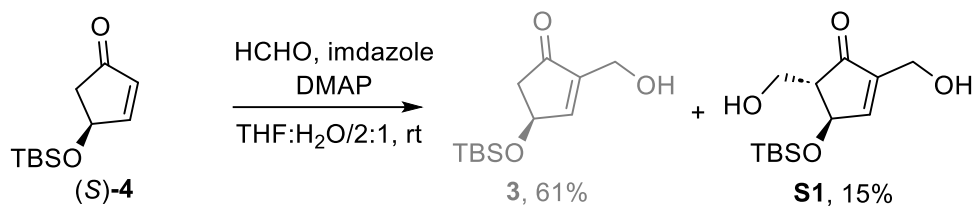

**<sup>1</sup>H NMR** (400 MHz, CDCl<sub>3</sub>): δ 7.34-7.27 (m, 1H, COC=CH), 4.87 (m, 1H, CHOTBS), 4.27 (dt, *J* = 14.8, 24.2 Hz, 2H, CH=CCH<sub>2</sub>OH), 4.05 (dd, *J* = 3.1, 11.0 Hz, 1H, CHCH<sub>a</sub>H<sub>b</sub>OH), 3.78 (dd, *J* = 4.5, 11.0 Hz, 1H, CHCH<sub>a</sub>H<sub>b</sub>OH), 3.19 (brs, 1H, OH<sub>a</sub>), 3.17 (brs, 1H, OH<sub>b</sub>), 2.40-2.36 (m, 1H, CHCH<sub>a</sub>H<sub>b</sub>OH), 0.88 [s, 9H, SiC(CH<sub>3</sub>)<sub>3</sub>], 0.14 [s, 3H, Si(CH<sub>3</sub>)<sub>2</sub>], and 0.11 [s, 3H, Si(CH<sub>3</sub>)<sub>2</sub>].

**<sup>13</sup>C NMR** (101 MHz, CDCl<sub>3</sub>): δ 207.0, 158.6, 145.6, 71.6, 59.0, 58.9, 56.8, 25.8, 18.1, -4.5, and -4.6.

**HRMS** (ESI) *m/z*: [M + H]<sup>+</sup> Calcd for C<sub>13</sub>H<sub>25</sub>O<sub>4</sub>Si<sup>+</sup> 273.1517; Found 273.1514.

**IR** (film): 3340 (broad), 2930, 2850, 2260, 1710, 1250, and 1070 cm<sup>-1</sup>.

**3-(Tert-butoxymethyl)-4-((tert-butyldimethylsilyl)oxy)-2-methylenecyclopentan-1-one (*rac*-2)**

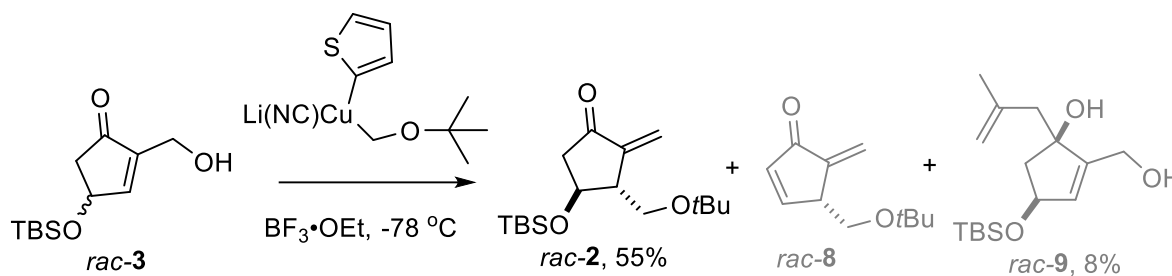

To a stirred solution of *t*-BuOK (550 mg, 4.9 mmol) in *tert*-butyl methyl ether (15 mL) was added *s*-BuLi (5.0 mL, 1.0 M in THF, 4.9 mmol) at -78 °C. The resulting mixture was stirred at the same temperature for 4 hours followed by adding lithium 2-thienylcyanocuprate (20 mL, 0.25 M in THF, 5.0 mmol). The resulting mixture was stirred at -40 °C for one hour, then *rac*-3 (400 mg, 1.65 mmol) in THF was added at -78 °C followed by BF<sub>3</sub>•Et<sub>2</sub>O (0.9 mL, ≥46.5% BF<sub>3</sub> basis, 3.3 mmol). The cooling bath was removed and the suspension was allowed to warm to room temperature. After completion of the reaction as monitored by TLC, the reaction was quenched with NaHCO<sub>3</sub> (10 mL, satd aq). The layers were separated and the aqueous layer was extracted with CH<sub>2</sub>Cl<sub>2</sub> (3x20 mL). The combined organic layers were washed with brine (10 mL), dried (Na<sub>2</sub>SO<sub>4</sub>), filtered and concentrated *in vacuo*. Flash column chromatography (silica gel, hexanes:EtOAc = 5:1) afforded *rac*-2 (280 mg, 55%) and *rac*-9 (40 mg, 8%) as a colorless oil.

**$^1\text{H}$  NMR** (400 MHz,  $\text{CDCl}_3$ ):  $\delta$  6.10 (dd,  $J = 1.0, 2.6$  Hz, 1H,  $\text{COC}=\text{CCH}_a\text{H}_b$ ), 5.43 (dd,  $J = 1.0, 2.3$  Hz, 1H,  $\text{COC}=\text{CCH}_a\text{H}_b$ ), 4.32 (dt,  $J = 4.2, 6.2$  Hz, 1H,  $\text{CHOTBS}$ ), 3.45 (dq,  $J = 5.7, 10.0$  Hz, 2H,  $\text{CH}_2\text{OtBu}$ ), 2.85 (m, 1H,  $\text{CHCH}_2\text{OtBu}$ ), 2.65 (dd,  $J = 6.3, 18.0$  Hz, 1H,  $\text{COCH}_a\text{H}_b$ ), 2.31 (ddd,  $J = 1.0, 4.5, 18.1$  Hz, 1H,  $\text{COCH}_a\text{H}_b$ ), 1.16 [s, 9H,  $\text{O}(\text{CH}_3)_3$ ], 0.87 [s, 9H,  $\text{Si}(\text{CH}_3)_3$ ], 0.08 [s, 3H,  $\text{Si}(\text{CH}_3)_2$ ], and 0.06 [s, 3H,  $\text{Si}(\text{CH}_3)_2$ ].

**$^{13}\text{C}$  NMR** (101 MHz,  $\text{CDCl}_3$ ):  $\delta$  205.1, 145.6, 119.1, 73.0, 69.7, 62.4, 52.1, 47.5, 27.5, 25.9, 18.2, -4.5, and -4.7.

**HRMS** (ESI)  $m/z$ :  $[\text{M} + \text{H}]^+$  Calcd for  $\text{C}_{17}\text{H}_{33}\text{O}_3\text{Si}^+$  313.2193; Found 313.2196.

**IR** (film): 2950, 2930, 2849, 1728, 1369, and 1248  $\text{cm}^{-1}$ .

By following the same procedure as above (+)-**2** (132 mg, 51%) was obtained from **3** (202 mg).  
**Specific Rotation for (+)-2**:  $[\alpha]_{\text{D}}^{25} = +22.6^\circ$  ( $c = 1.0$ ,  $\text{CHCl}_3$ ).

**4-(Tert-butoxymethyl)-5-methylenecyclopent-2-en-1-one (*rac*-8)**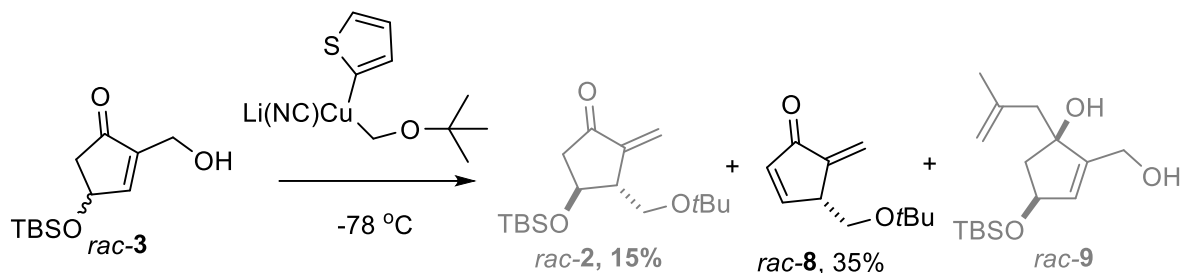

To a stirred solution of *t*-BuOK (135 mg, 1.2 mmol) in *tert*-butyl methyl ether (6 mL) was added *s*-BuLi (1.2 mL, 1.0 M in THF, 1.2 mmol) at  $-78\text{ }^{\circ}\text{C}$ . The resulting mixture was stirred at the same temperature for 4 hours followed by adding lithium 2-thienylcyanocuprate (5 mL, 0.25 M in THF, 1.2 mmol). The resulting mixture was stirred at  $-40\text{ }^{\circ}\text{C}$  for one hour, then *rac*-3 (100 mg, 0.42 mmol) in THF was added at  $-78\text{ }^{\circ}\text{C}$ . The cooling bath was removed and the suspension was allowed to warm to room temperature. After completion of the reaction as monitored by TLC, the reaction was quenched with  $\text{NaHCO}_3$  (10 mL, satd aq). The layers were separated and the aqueous layer was extracted with  $\text{CH}_2\text{Cl}_2$  (3x10 mL). The combined organic layers were washed with brine (10 mL), dried ( $\text{Na}_2\text{SO}_4$ ), filtered and concentrated *in vacuo*. Flash column chromatography (silica gel, hexanes:EtOAc = 5:1) afforded *rac*-2 (20 mg, 15%) and *rac*-8 (26 mg, 35%) as a colorless oil.

**$^1\text{H}$  NMR** (400 MHz,  $\text{CDCl}_3$ ):  $\delta$  7.68 (nofd,  $J_{\text{app}} = 6.0\text{ Hz}$ , 1H,  $\text{CH}=\text{CHCO}$ ), 6.41 (nofd,  $J_{\text{app}} = 6.1\text{ Hz}$ , 1H,  $\text{CH}=\text{CHCO}$ ), 6.13 (nofd,  $J_{\text{app}} = 1.5\text{ Hz}$ , 1H,  $\text{COC}=\text{CCH}_a\text{H}_b$ ), 5.57 (nofd,  $J_{\text{app}} = 1.5\text{ Hz}$ , 1H,  $\text{COC}=\text{CCH}_a\text{H}_b$ ), 3.56-3.51 (m, 1H,  $\text{CH}_2\text{OtBu}$ ), 3.39-3.36 (m, 1H,  $\text{CHCH}_2\text{OtBu}$ ), and 1.2 [s, 9H,  $\text{O}(\text{CH}_3)_3$ ].

**$^{13}\text{C}$  NMR** (101 MHz,  $\text{CDCl}_3$ ):  $\delta$  196.7, 160.9, 143.4, 135.7, 117.7, 73.4, 64.0, 45.8, 27.5, and 27.5.

**HRMS** (ESI)  $m/z$ :  $[\text{M} + \text{H}]^+$  Calcd for  $\text{C}_{11}\text{H}_{17}\text{O}_2^+$  181.1223; Found 181.1227.

**IR** (film): 3320, 3118, 2928, 2860, 1730, 1712, 1684, 1448, and  $1012\text{ cm}^{-1}$ .

**4-((Tert-butyldimethylsilyl)oxy)-2-(hydroxymethyl)-1-(2-methylallyl)cyclopent-2-en-1-ol**  
**(rac-9)**

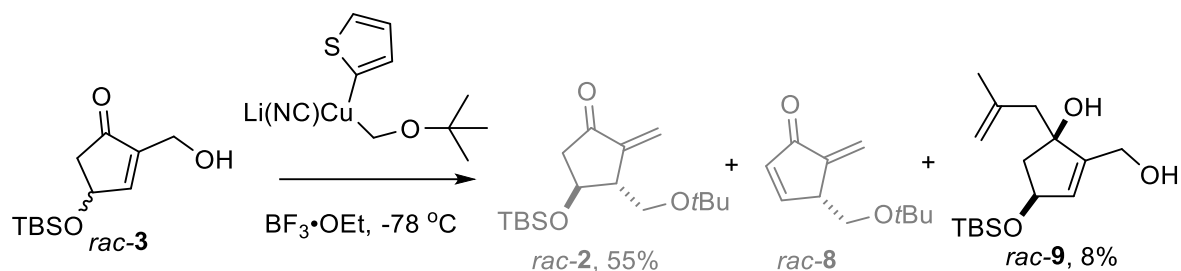

**$^1\text{H}$  NMR** (400 MHz,  $\text{CDCl}_3$ ):  $\delta$  5.72 (dt,  $J = 1.6, 1.8$  Hz, 1H,  $\text{C}=\text{CHCH}$ ), 4.89 (dt,  $J = 1.5, 3.7$  Hz, 1H,  $\text{C}=\text{CH}_a\text{H}_b$ ), 4.76 (dq,  $J = 1.0, 2.0$  Hz, 1H,  $\text{COC}=\text{CH}_a\text{H}_b$ ), 4.61 (m, 1H,  $\text{CHOTBS}$ ), 4.40 (dt,  $J = 1.6, 14.2$  Hz, 2H,  $\text{CH}_a\text{H}_b\text{OH}$ ), 4.29 (dt,  $J = 1.4, 14.2$  Hz, 2H,  $\text{CH}_a\text{H}_b\text{OH}$ ), 2.64 (dd,  $J = 6.7, 13.6$  Hz, 1H,  $\text{CHOTBSCH}_a\text{H}_b$ ), 2.49 (d,  $J = 14.0$  Hz, 1H,  $\text{CCH}_a\text{H}_b$ ), 2.18 (dd,  $J = 1.0, 13.6$  Hz, 1H,  $\text{CHOTBSCH}_a\text{H}_b$ ), 1.80 (noft, 3H,  $\text{CCH}_3$ ), 1.76 (dd,  $J = 4.2, 13.5$  Hz, 1H,  $\text{CCH}_a\text{H}_b$ ), 0.89 [s, 9H,  $\text{SiC}(\text{CH}_3)_3$ ], 0.08 [s, 3H,  $\text{Si}(\text{CH}_3)_2$ ] and 0.078 [s, 3H,  $\text{Si}(\text{CH}_3)_2$ ].

**$^{13}\text{C}$  NMR** (101 MHz,  $\text{CDCl}_3$ ):  $\delta$  9.8, 142.5, 130.9, 114.9, 83.7, 73.7, 59.4, 49.4, 46.3, 26.0, 24.4, 18.4, and -4.6.

**HRMS** (ESI)  $m/z$ :  $[\text{M} + \text{Na}]^+$  Calcd for  $\text{C}_{16}\text{H}_{30}\text{NaO}_3\text{Si}^+$  321.1856; Found 321.1853.

**IR** (film): 3418, 2961, 2930, 2859, 1771, 1248, and  $1068\text{ cm}^{-1}$ .

**(1*R*,3*R*,4*S*)-3-(Tert-butoxymethyl)-4-((tert-butyldimethylsilyl)oxy)-2-methylenecyclopentan-1-ol (10)**

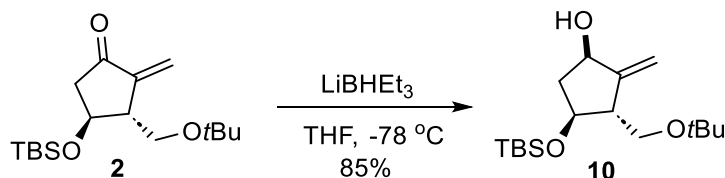

To a stirred solution of **2** (130 mg, 0.42 mmol) in THF (3 mL) were added LiBHET<sub>3</sub> (0.5 ml, 1.0 M in THF, 0.5 mmol). The resulting mixture was stirred at -78 °C for 30 min before it was quenched by the addition of NH<sub>4</sub>Cl (10 mL, satd aq). The layers were separated and the aqueous layer was extracted with CH<sub>2</sub>Cl<sub>2</sub> (3x10 mL). The combined organic layers were washed with brine (10 mL), dried (Na<sub>2</sub>SO<sub>4</sub>), filtered and concentrated *in vacuo*. Flash column chromatography (silica gel, hexanes:EtOAc = 5:1) afforded **10** (110 mg, 85%) as a colorless oil.

**<sup>1</sup>H NMR** (400 MHz, CDCl<sub>3</sub>): δ 5.38 (nofd, 1H, C=CCH<sub>a</sub>H<sub>b</sub>), 5.14 (nofd, 1H, C=CCH<sub>a</sub>H<sub>b</sub>), 4.36 (m, 1H, CHOH), 4.35-4.32 (m, 1H, CHOTBS), 3.30 (dd, *J* = 5.2, 9.2 Hz, 1H, CH<sub>a</sub>H<sub>b</sub>OTBu), 3.10 (d, *J* = 10.6 Hz, 1H, CHOH), 2.85 (t, *J* = 9.4 Hz, 1H, CH<sub>a</sub>H<sub>b</sub>OTBu), 2.76 (m, 1H, CHCH<sub>a</sub>H<sub>b</sub>OTBu), 1.94 (dd, *J* = 5.0, 13.5 Hz, 1H, CHOHCH<sub>a</sub>H<sub>b</sub>), 1.83 (dt, *J* = 2.1, 13.6 Hz, 1H, CHOHCH<sub>a</sub>H<sub>b</sub>), 1.15 [s, 9H, O(CH<sub>3</sub>)<sub>3</sub>], 0.88 [s, 9H, Si(CH<sub>3</sub>)<sub>3</sub>], 0.093 [s, 3H, Si(CH<sub>3</sub>)<sub>2</sub>], and 0.091 [s, 3H, Si(CH<sub>3</sub>)<sub>2</sub>].

**<sup>13</sup>C NMR** (101 MHz, CDCl<sub>3</sub>): δ 154.8, 111.8, 76.4, 76.1, 72.8, 63.6, 53.3, 42.0, 27.6, 26.0, 18.1, -4.7, and -4.8.

**HRMS** (ESI) *m/z*: [M + Na]<sup>+</sup> Calcd for C<sub>17</sub>H<sub>34</sub>NaO<sub>3</sub>Si<sup>+</sup> 337.2169; Found 337.2170.

**IR** (film): 3404 (broad), 2951, 2931, 2842, 1459, 1360, and 1081 cm<sup>-1</sup>.

**Specific Rotation:** [α]<sub>D</sub><sup>25</sup> = -30.0° (*c* = 1.0, CHCl<sub>3</sub>).

## Synthesis of compound 12

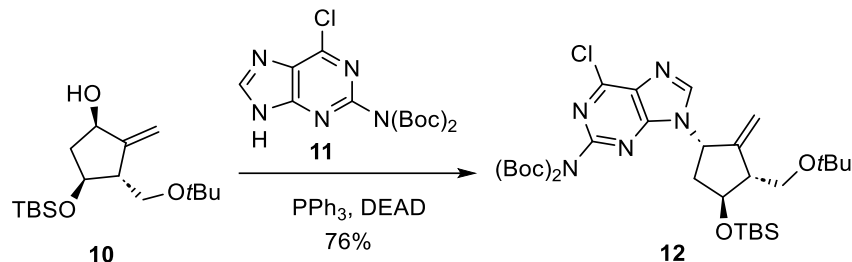

To a stirred solution of triphenylphosphine (138 mg, 0.52 mmol) in THF (4 mL) was added diethyl azodicarboxylate (DEAD) (82  $\mu$ L, 0.52 mmol) at -10 °C dropwise. The resulting mixture was stirred at the same temperature for 30 min before it was added a mixture of compound **10** (110 mg, 0.35 mmol) and **11**<sup>[4]</sup> (192 mg, 0.52 mmol) in THF (2 mL) at 0 °C. The resulting mixture was stirred at 0 °C for 6 h before it quenched by the addition of NaHCO<sub>3</sub> (10 mL). The layers were separated and the aqueous layer was extracted with CH<sub>2</sub>Cl<sub>2</sub> (3x10 mL). The combined organic layer was washed with brine (10 mL), dried (Na<sub>2</sub>SO<sub>4</sub>), filtered and concentrated *in vacuo*. The residue was purified by flash column chromatography (silica gel, hexanes:EtOAc = 4:1) to give **12** (176 mg, 76%) a white solid.

**<sup>1</sup>H NMR** (400 MHz, CDCl<sub>3</sub>):  $\delta$  8.45 (s, 1H, N=CH), 5.65 (t,  $J$  = 7.7 Hz, 1H, NCH), 5.26 (t,  $J$  = 2.2 Hz, 1H, C=CH<sub>a</sub>H<sub>b</sub>), 4.91 (t,  $J$  = 7.7 Hz, 1H, C=CH<sub>a</sub>H<sub>b</sub>), 4.38 (dt,  $J$  = 3.6, 4.7 Hz, 1H, CHOTBS), 3.61 (m, 2H, CH<sub>2</sub>OtBu), , CH<sub>a</sub>H<sub>b</sub>OtBu), 2.67 (m, 1H, CHC=CH<sub>2</sub>), 2.29 (ddd,  $J$  = 5.0, 7.9, 12.9 Hz, 1H, CHCH<sub>a</sub>H<sub>b</sub>), 2.20 (ddd,  $J$  = 5.0, 7.9, 12.9 Hz, CHCH<sub>a</sub>H<sub>b</sub>), 1.41 [s, 18 H, (Boc)<sub>2</sub>], 1.21 [s, 9H, O(CH<sub>3</sub>)<sub>3</sub>], 0.86 [s, 9H, SiC(CH<sub>3</sub>)<sub>3</sub>], 0.04 [s, 3H, Si(CH<sub>3</sub>)<sub>2</sub>], and 0.02 [s, 3H, Si(CH<sub>3</sub>)<sub>2</sub>].

**<sup>13</sup>C NMR** (101 MHz, CDCl<sub>3</sub>):  $\delta$  152.8, 151.7, 150.9, 150.6, 149.3, 146.2, 130.1, 112.4, 83.6, 73.2, 73.1, 62.3, 57.0, 53.0, 41.5, 28.0, 27.6, 25.9, 18.1, -4.6, and -4.7.

**HRMS** (ESI)  $m/z$ : [M + Na]<sup>+</sup> Calcd for C<sub>32</sub>H<sub>52</sub>ClN<sub>5</sub>NaO<sub>6</sub>Si<sup>+</sup> 688.3268; Found 688.3284.

**IR** (film): 3410, 2970, 2860, 1796, 1680, 1560, and 1230 cm<sup>-1</sup>.

**Specific Rotation** :  $[\alpha]_D^{25} = +28.6^\circ$  ( $c$  = 1.0, CHCl<sub>3</sub>).

**Synthesis of entecavir (1)**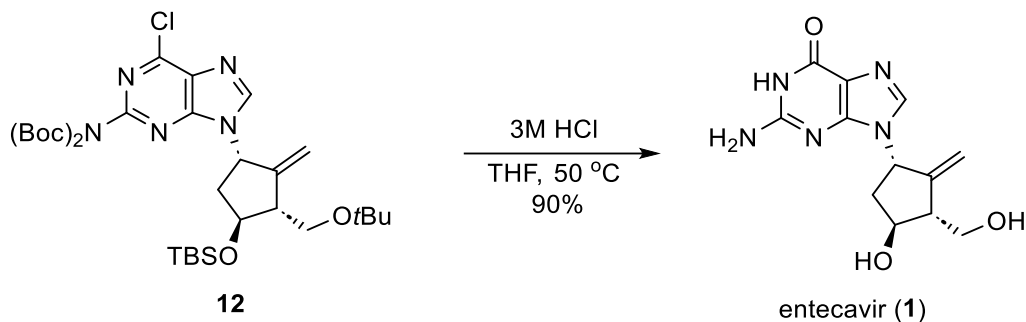

To a stirred solution of **12** (150 mg, 0.30 mmol) in THF (3 mL) was added 3 mL of 3M aqueous HCl. The resulting mixture was stirred at 50 °C for 10 h before it was quenched by the addition of Et<sub>3</sub>N (1 mL). The mixture was concentrated, and the residue was purified by flash column chromatography (silica gel, CH<sub>2</sub>Cl<sub>2</sub>/MeOH 4:1) to give entecavir (**1**) (56 mg, 90%) as a white solid.

**<sup>1</sup>H NMR** (400 MHz, DMSO-*d*<sub>6</sub>): δ 10.84 (s, 1H, NH), 7.66 (s, 1H, N=CH), 6.66 (s, 2H, NH<sub>2</sub>), 5.34 (t, *J* = 9.2 Hz, 1H, NCHCH<sub>2</sub>), 5.09 (s, 1H, =CH<sub>a</sub>H<sub>b</sub>), 4.94 (brs, 1H, OH), 4.91 (brs, 1H, OH), 4.54 (s, 1H, =CH<sub>a</sub>H<sub>b</sub>), 4.23 (s, 1H, CHOH), 3.52 (t, *J* = 6.1 Hz, 2H, CH<sub>2</sub>OH), 2.55-2.50 (m, 1H, CHCH<sub>2</sub>OH), 2.24-2.17 (m, 1H, CH<sub>a</sub>H<sub>b</sub>CN), and 2.05-2.00 (m, 1H, CH<sub>a</sub>H<sub>b</sub>CN).

**<sup>13</sup>C NMR** (101 MHz, DMSO-*d*<sub>6</sub>): δ 156.9, 153.8, 151.5, 151.4, 136.0, 116.2, 109.3, 70.4, 63.0, 55.2, 54.1, and 39.2.

**HRMS** (ESI) *m/z*: [M + Na]<sup>+</sup> Calcd for C<sub>12</sub>H<sub>15</sub>N<sub>5</sub>NaO<sub>3</sub><sup>+</sup> 300.1067; Found 300.1074.

**IR** (film): 3440, 3300, 3226, 2950, 2858, 2630, and 1609 cm<sup>-1</sup>.

**Specific Rotation** : [α]<sub>D</sub><sup>25</sup> = +26.4° (*c* = 0.25, DMF:H<sub>2</sub>O/1:1).



# <sup>1</sup>H NMR Spectroscopic Comparison of Reported Work<sup>[5,6]</sup> and Our Synthetic (+) - Entecavir (1)

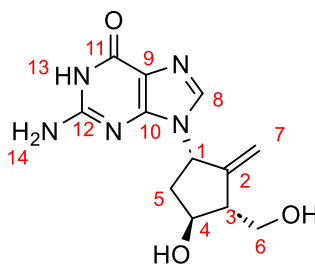

entecavir (1)

| Position | <sup>1</sup> H NMR (δ)<br>(first reported by<br>G. S. Bisacchi and co-workers) <sup>a</sup><br>(400 MHz, DMSO- <i>d</i> <sub>6</sub> ) | <sup>1</sup> H NMR (δ)<br>(reported by<br>H. Xu and co-workers) <sup>b</sup><br>(500 MHz, DMSO- <i>d</i> <sub>6</sub> ) | <sup>1</sup> H NMR (δ)<br>This work<br>(400 MHz, DMSO- <i>d</i> <sub>6</sub> ) |
|----------|----------------------------------------------------------------------------------------------------------------------------------------|-------------------------------------------------------------------------------------------------------------------------|--------------------------------------------------------------------------------|
| 1        | 5.36 (m, 1H)                                                                                                                           | 5.36 (dd, <i>J</i> = 10.3, 8.0 Hz, 1H)                                                                                  | 5.34 (t, <i>J</i> = 9.2 Hz, 1H)                                                |
| 2        | -                                                                                                                                      | -                                                                                                                       | -                                                                              |
| 3        | 2.52 (m, 1H)                                                                                                                           | 2.55-2.50 (m, 1H)                                                                                                       | 2.55-2.50 (m, 1H)                                                              |
| 4        | 4.23 (m, 1H)                                                                                                                           | 4.23 (s, 1H)                                                                                                            | 4.23 (s, 1H)                                                                   |
| 5        | 2.2 (m, 1H)                                                                                                                            | 2.26-2.17 (m, 1H)                                                                                                       | 2.24-2.17 (m, 1H)                                                              |
|          | 2.04 (m, 1H)                                                                                                                           | 2.04 (dd, <i>J</i> = 12.5, 7.8 Hz, 1H)                                                                                  | 2.05-2.00 (m, 1H)                                                              |
| 6        | 3.53 (m, 1H)                                                                                                                           | 3.54 (t, <i>J</i> = 6.1 Hz, 2H)                                                                                         | 3.52 (t, <i>J</i> = 6.1 Hz, 2H)                                                |
| 7        | 5.10 (m, 1H)                                                                                                                           | 5.10 (s, 1H)                                                                                                            | 5.09 (s, 1H)                                                                   |
|          | 4.56 (m, 1H)                                                                                                                           | 4.56 (s, 1H)                                                                                                            | 4.54 (s, 1H)                                                                   |
| 8        | 7.66 (s, 1H)                                                                                                                           | 7.65 (s, 1H)                                                                                                            | 7.66 (s, 1H)                                                                   |
| 9        | -                                                                                                                                      | -                                                                                                                       | -                                                                              |
| 10       | -                                                                                                                                      | -                                                                                                                       | -                                                                              |
| 11       | -                                                                                                                                      | -                                                                                                                       | -                                                                              |
| 12       | -                                                                                                                                      | -                                                                                                                       | -                                                                              |
| 13       | 10.54 (bs, 1H)                                                                                                                         | 10.55 (s, 1H)                                                                                                           | 10.84 (s, 1H)                                                                  |
| 14       | 6.42 (s, 2H)                                                                                                                           | 6.40 (s, 2H)                                                                                                            | 6.66 (s, 2H)                                                                   |

<sup>a</sup> ref. 5; <sup>b</sup> ref. 6

**$^{13}\text{C}$  NMR Spectroscopic Comparison of Reported Work<sup>[5,6]</sup> and Our Synthetic (+) - Entecavir (1)**

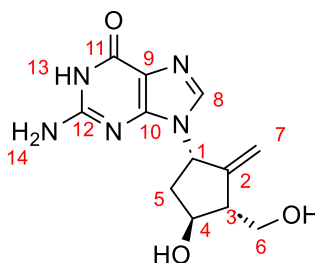

entecavir (1)

| Position | $^{13}\text{C}$ NMR ( $\delta$ )<br>(The original literature did not<br>provide $^{13}\text{C}$ NMR data) <sup>a</sup> | $^{13}\text{C}$ NMR ( $\delta$ )<br>( reported by<br>H. Xu and co-workers) <sup>b</sup><br>(126 MHz, DMSO- $d_6$ ) | $^{13}\text{C}$ NMR ( $\delta$ )<br>This work<br>(101 MHz, DMSO- $d_6$ ) |
|----------|------------------------------------------------------------------------------------------------------------------------|--------------------------------------------------------------------------------------------------------------------|--------------------------------------------------------------------------|
| 1        |                                                                                                                        | 55.1                                                                                                               | 55.2                                                                     |
| 2        |                                                                                                                        | 156.8                                                                                                              | 156.9                                                                    |
| 3        |                                                                                                                        | 54.1                                                                                                               | 54.1                                                                     |
| 4        |                                                                                                                        | 70.4                                                                                                               | 70.4                                                                     |
| 5        |                                                                                                                        | 39.2                                                                                                               | 39.2                                                                     |
| 6        |                                                                                                                        | 63.0                                                                                                               | 63.0                                                                     |
| 7        |                                                                                                                        | 109.2                                                                                                              | 109.3                                                                    |
| 8        |                                                                                                                        | 135.9                                                                                                              | 136.0                                                                    |
| 9        |                                                                                                                        | 116.2                                                                                                              | 116.2                                                                    |
| 10       |                                                                                                                        | 151.3                                                                                                              | 151.4                                                                    |
| 11       |                                                                                                                        | 153.4                                                                                                              | 153.8                                                                    |
| 12       |                                                                                                                        | 151.4                                                                                                              | 151.5                                                                    |

<sup>a</sup> ref. 5; <sup>b</sup> ref. 6

### III. HPLC Data

HPLC data of compound **4**

HPLC spectrum of *rac*-**4**

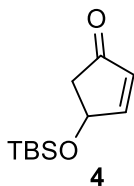

#### Single Injection Report

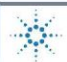

Agilent Technologies

Data file: LC1260-2024-12-29 13-19-25+08-00.dx  
Sequence Name: SingleSample Project Name: HPLC1  
Sample name: tbsol-2 Operator: 系统  
Instrument: LC1260 Injection date: 2024-12-29 13:20:22+08:00  
Inj. volume: 3.000 Location: P2-A6  
Acq. method: hplc1.amx Type: Sample  
Processing method: GC\_LC Area Percent\_DefaultMethod.pmx Sample amount: 0.00  
Manually modified: Manual Integration

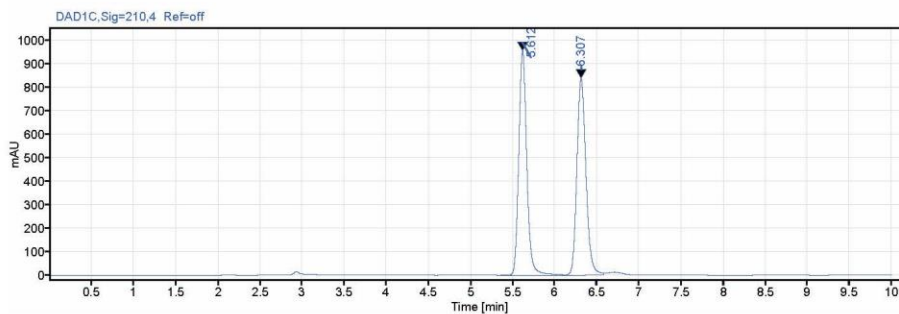

Signal: DAD1C,Sig=210,4 Ref=off

| RT [min] | Type | Width [min] | Area     | Height | Area% | Name |
|----------|------|-------------|----------|--------|-------|------|
| 5.612    | BM m | 0.10        | 6359.96  | 958.96 | 50.15 |      |
| 6.307    | MM m | 0.12        | 6322.34  | 841.47 | 49.85 |      |
|          |      | Sum         | 12682.31 |        |       |      |

## HPLC spectrum of (S)-4

The enantiomeric excess (ee) was 99.26% ee,

determined by HPLC on Chiralpak AS-H column, *n*-hexane : isopropanol = 99:1; flow rate = 1.0 mL/min; UV detection at 210 nm;  $t_{R1}$  = 5.737 min (minor),  $t_{R2}$  = 6.418 min (major).

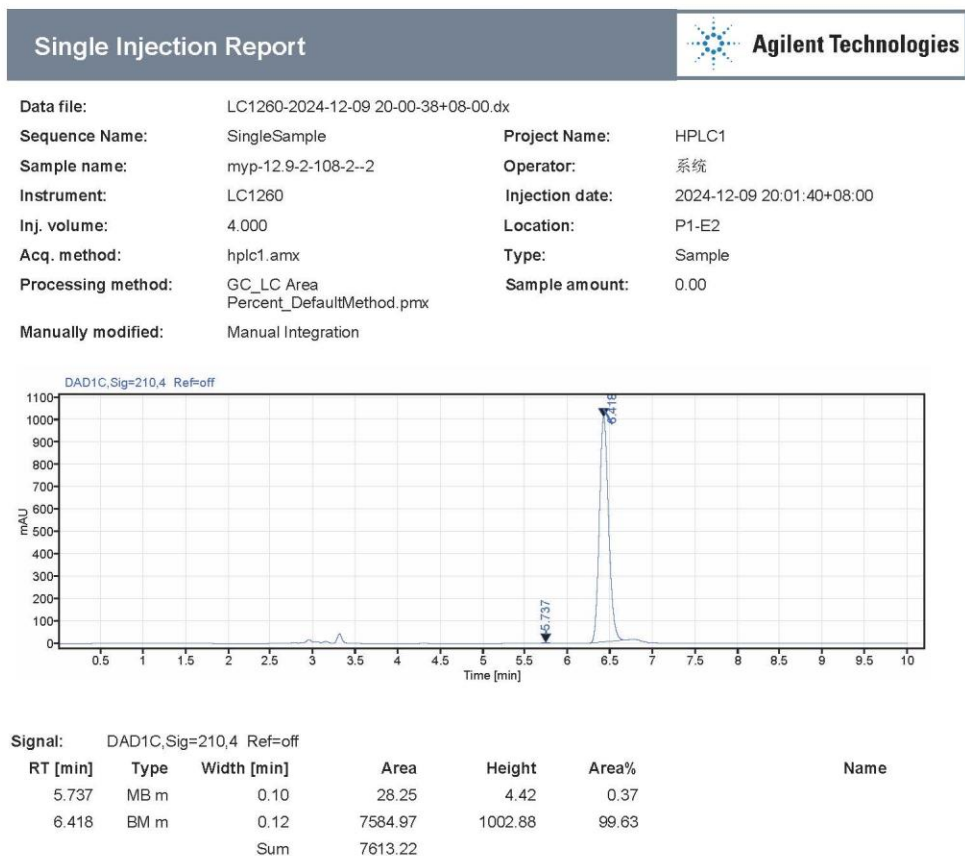

## HPLC spectrum of (*R*)-4

The enantiomeric excess (ee) was 98.06% ee,

determined by HPLC on Chiralpak AS-H column, *n*-hexane : isopropanol = 99:1; flow rate = 1.0 mL/min; UV detection at 210 nm;  $t_{R1}$  = 5.694 min (major),  $t_{R2}$  = 6.367 min (minor).

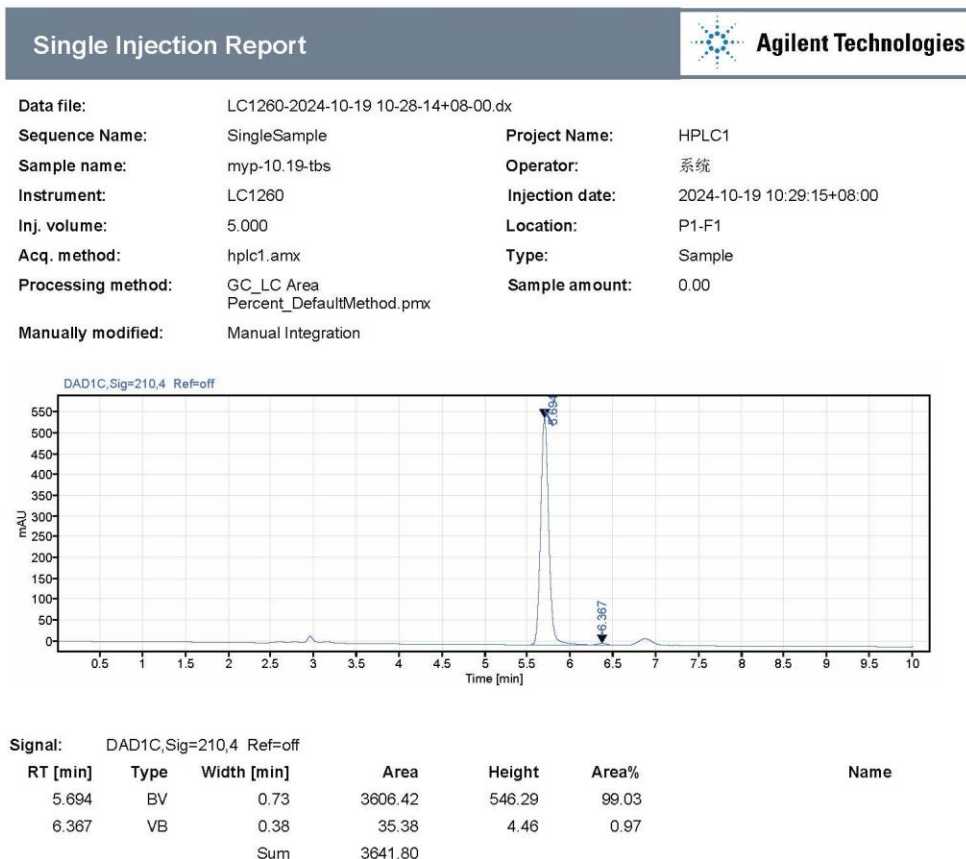

HPLC data of compound **3**HPLC spectrum of *rac*-**3**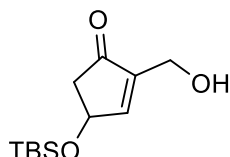

## Single Injection Report

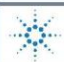

Agilent Technologies

Data file: LC1260-2024-12-29 11-21-25+08-00.dx  
Sequence Name: SingleSample Project Name: HPLC1  
Sample name: mbh+-1 Operator: 系统  
Instrument: LC1260 Injection date: 2024-12-29 11:22:20+08:00  
Inj. volume: 2.000 Location: P2-A5  
Acq. method: hplc1.amx Type: Sample  
Processing method: GC\_LC Area Percent\_DefaultMethod.pmx Sample amount: 0.00  
Manually modified: Manual Integration

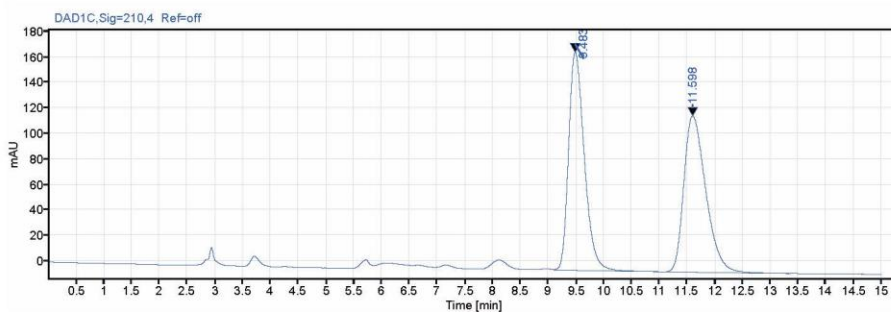

Signal: DAD1C,Sig=210,4 Ref=off

| RT [min] | Type | Width [min] | Area    | Height | Area% | Name |
|----------|------|-------------|---------|--------|-------|------|
| 9.483    | VB   | 1.96        | 3357.43 | 170.97 | 49.94 |      |
| 11.598   | BB   | 2.25        | 3365.78 | 122.53 | 50.06 |      |
|          | Sum  |             | 6723.21 |        |       |      |

HPLC spectrum of (-)-**3**

The enantiomeric excess (ee) was 99.24% ee,

determined by HPLC on Chiralpak AS-H column, *n*-hexane : isopropanol = 95:5; flow rate = 0.8 mL/min; UV detection at 210 nm;  $t_{R1}$  = 9.386 min (major),  $t_{R2}$  = 11.753 min (minor).

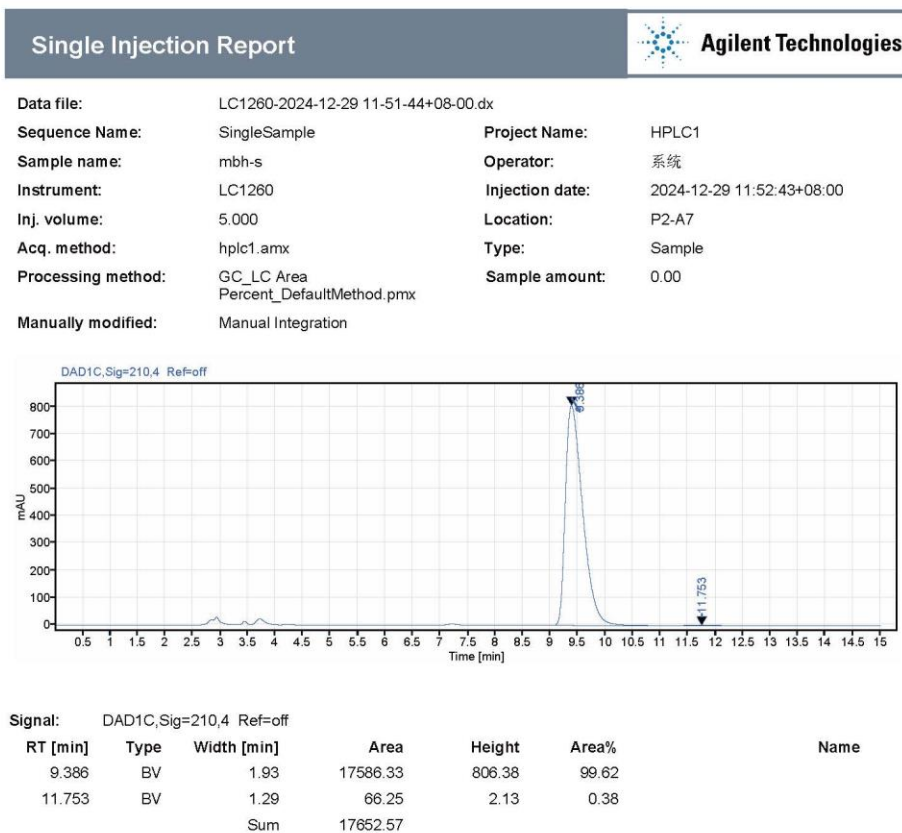

HPLC data of compound **2**HPLC spectrum of *rac*-**2**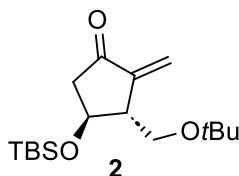

## Single Injection Report

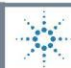

Agilent Technologies

|                    |                                         |                 |                           |
|--------------------|-----------------------------------------|-----------------|---------------------------|
| Data file:         | LC1260-2024-12-16 20:50:57+08:00.dx     |                 |                           |
| Sequence Name:     | SingleSample                            | Project Name:   | HPLC1                     |
| Sample name:       | myp-12.16-racemic-3                     | Operator:       | 系统                        |
| Instrument:        | LC1260                                  | Injection date: | 2024-12-16 20:51:55+08:00 |
| Inj. volume:       | 3.000                                   | Location:       | P1-D1                     |
| Acq. method:       | hplc1.amx                               | Type:           | Sample                    |
| Processing method: | GC_LC Area<br>Percent_DefaultMethod.pmw | Sample amount:  | 0.00                      |
| Manually modified: | Manual Integration                      |                 |                           |

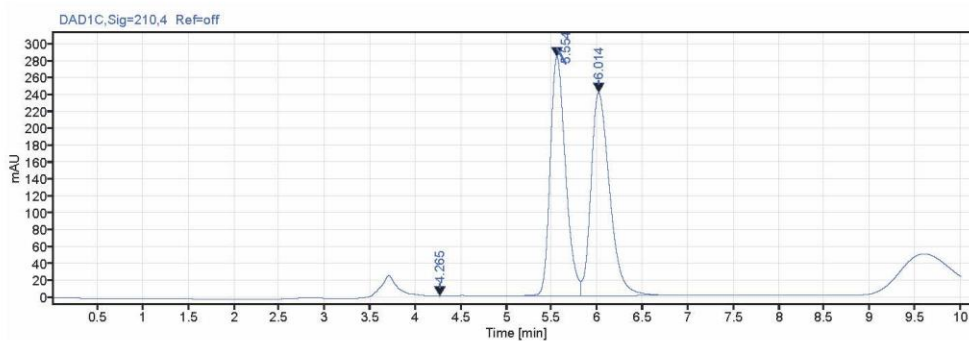

Signal: DAD1C,Sig=210,4 Ref=off

| RT [min] | Type | Width [min] | Area    | Height | Area% | Name |
|----------|------|-------------|---------|--------|-------|------|
| 4.265    | MV m | 0.00        | 0.03    | 0.31   | 0.00  |      |
| 5.554    | BV   | 0.80        | 3320.25 | 282.62 | 49.23 |      |
| 6.014    | VB   | 1.05        | 3423.70 | 240.08 | 50.77 |      |
|          | Sum  |             | 6743.98 |        |       |      |



## HPLC spectrum of (+)-2

The enantiomeric excess (ee) was 98.32% ee,

determined by HPLC on Chiralpak AS-H column, *n*-hexane : isopropanol = 99:1; flow rate = 0.8 mL/min; UV detection at 210 nm;  $t_{R1}$  = 5.696 min (minor),  $t_{R2}$  = 6.179 min (major).

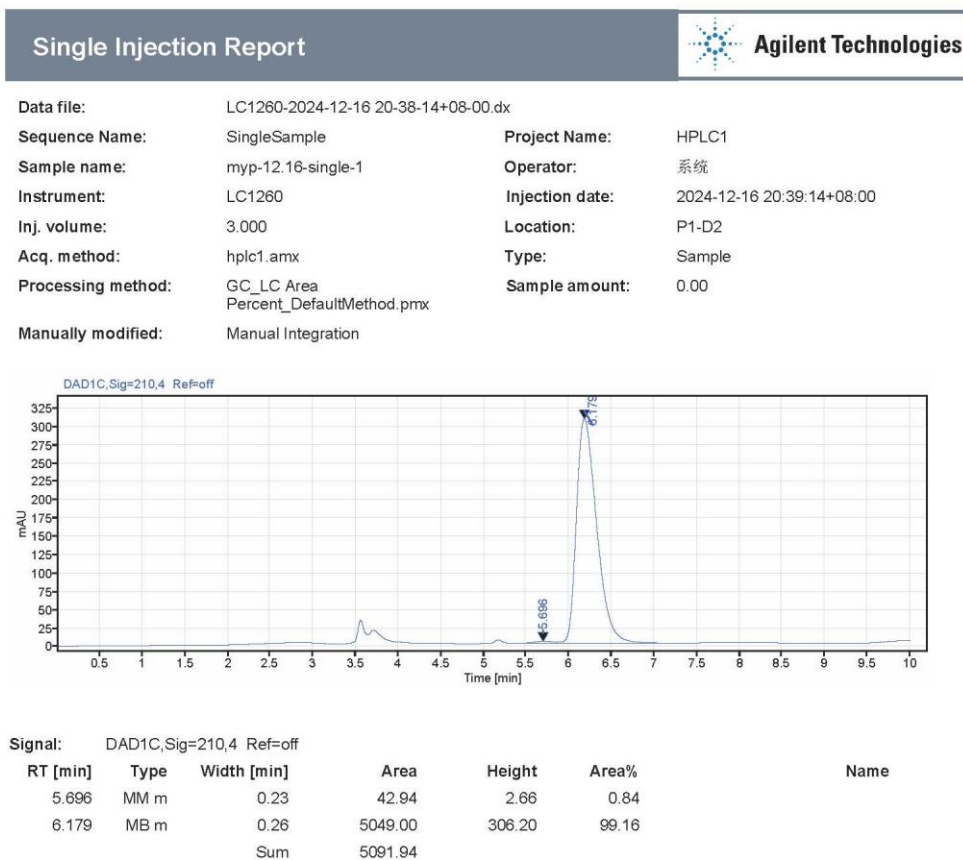

## HPLC data of entecavir (1)

HPLC spectrum of *rac*-1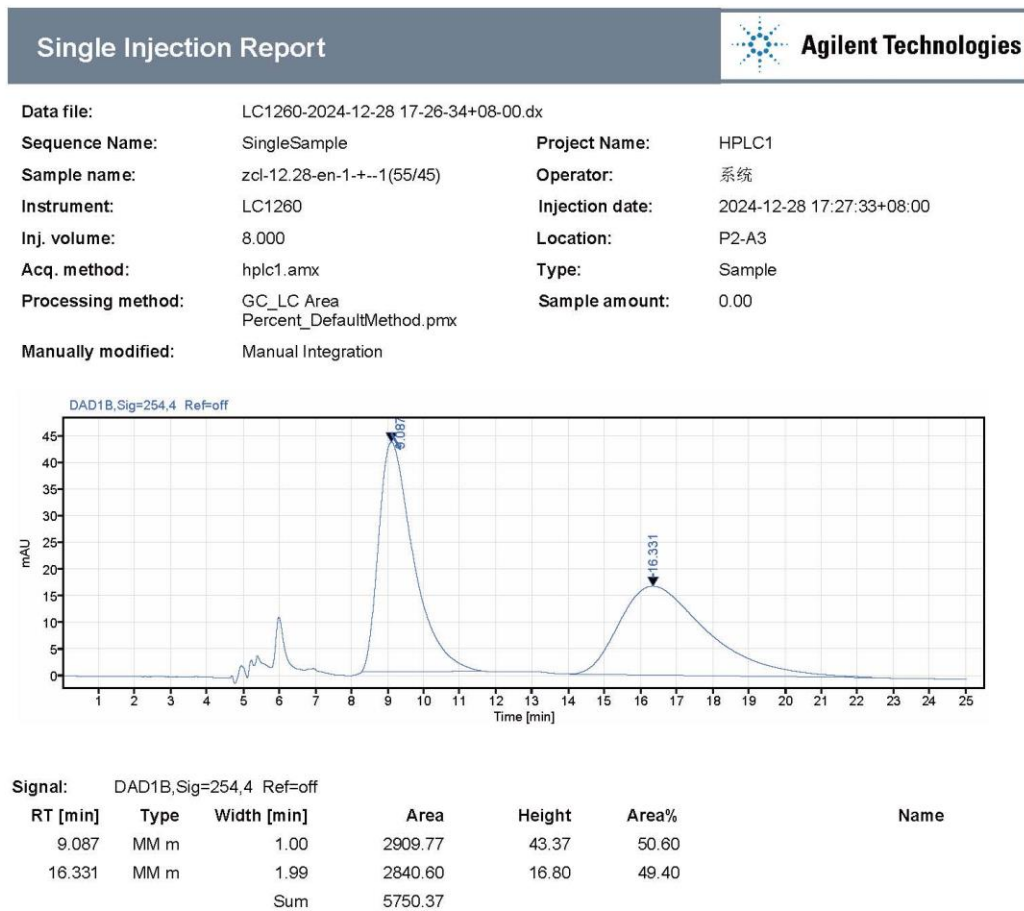

## HPLC spectrum of entecavir (1)

The enantiomeric excess (ee) was 99.9% ee,

determined by HPLC on Chiralpak AD-H column, *n*-hexane : EtOH: Et<sub>3</sub>N = 55:45:0.1; flow rate = 0.6 mL/min; UV detection at 210 nm; t<sub>R1</sub> = 8.920 min (minor), t<sub>R2</sub> = 17.017 min (major).

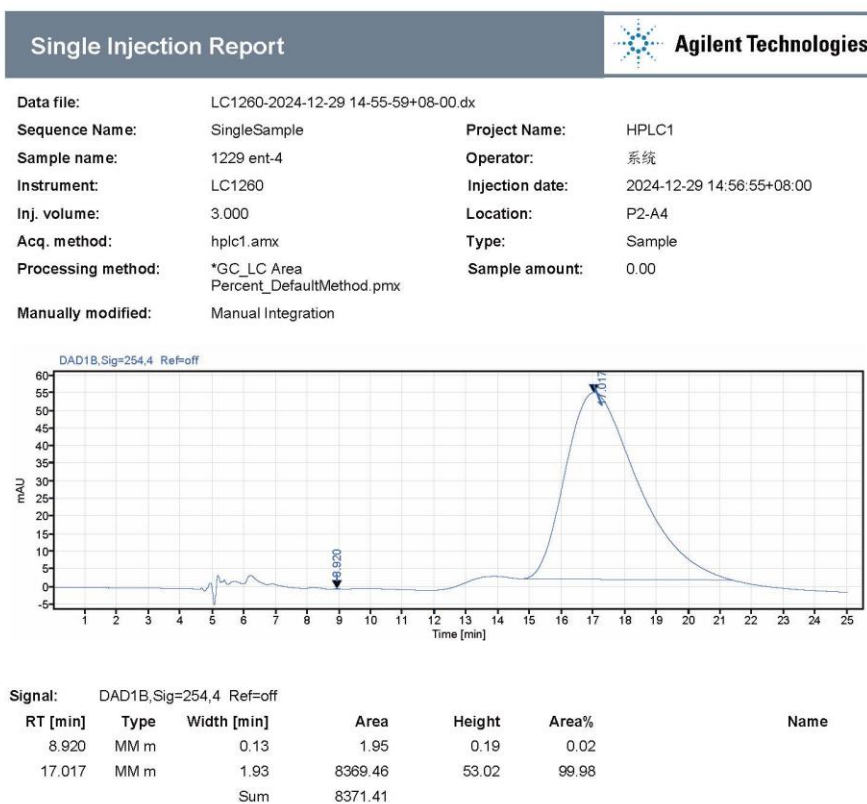

#### IV. References for the Supporting Information

- [1] T. R. Hoyer, P. R. Hanson, J. R. Vyvyan, A practical guide to first-order multiplet analysis in  $^1\text{H}$  NMR spectroscopy, *J. Org. Chem.*, 1994, **59**, 4096–4013.
- [2] T. R. Hoyer, H. Zhao, A method for easily determining coupling constant values: An addendum to “a practical guide to first-order multiplet analysis in  $^1\text{H}$  NMR spectroscopy”, *J. Org. Chem.*, 2002, **67**, 4014–4016.
- [3] P. R. Hamann, A. Wissner, The efficient synthesis of two prostaglandin intermediates, *Synthetic Commun.*, 1989, **19**, 1509–1518.
- [4] S. Dey, P. Garner, Synthesis of *tert*-butoxycarbonyl (Boc)-protected purines, *J. Org. Chem.*, 2000, **65**, 7697–7699.
- [5] G. S. Bisacchi, S. T. Chao, C. Bachard, J. P. Daris, S. Innaimo, G. A. Jacobs, O. Kocy, P. Lapointe, A. Martel, Z. Merchant, W. A. Slusarchyk, J. E. Sundeen, M. G. Young, R. Colonno, R. Zahler, BMS-200475, a novel carbocyclic 2'-deoxyguanosine analog with potent and selective antihepatitis B virus activity in vitro, *Bioorg. Med. Chem. Lett.*, 1997, **7**, 127–132.
- [6] H. Xu, F. Wang, W. Xue, Y. Zheng, Q. Wang, F. G. Qiu, Y. Jin, Total synthesis of entecavir: A robust route for pilot production. *Org. Process Res. Dev.*, 2018, **22**, 377–384.

#### V. Copies of $^1\text{H}$ and $^{13}\text{C}$ NMR Spectra

pg29 of pg50

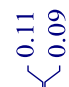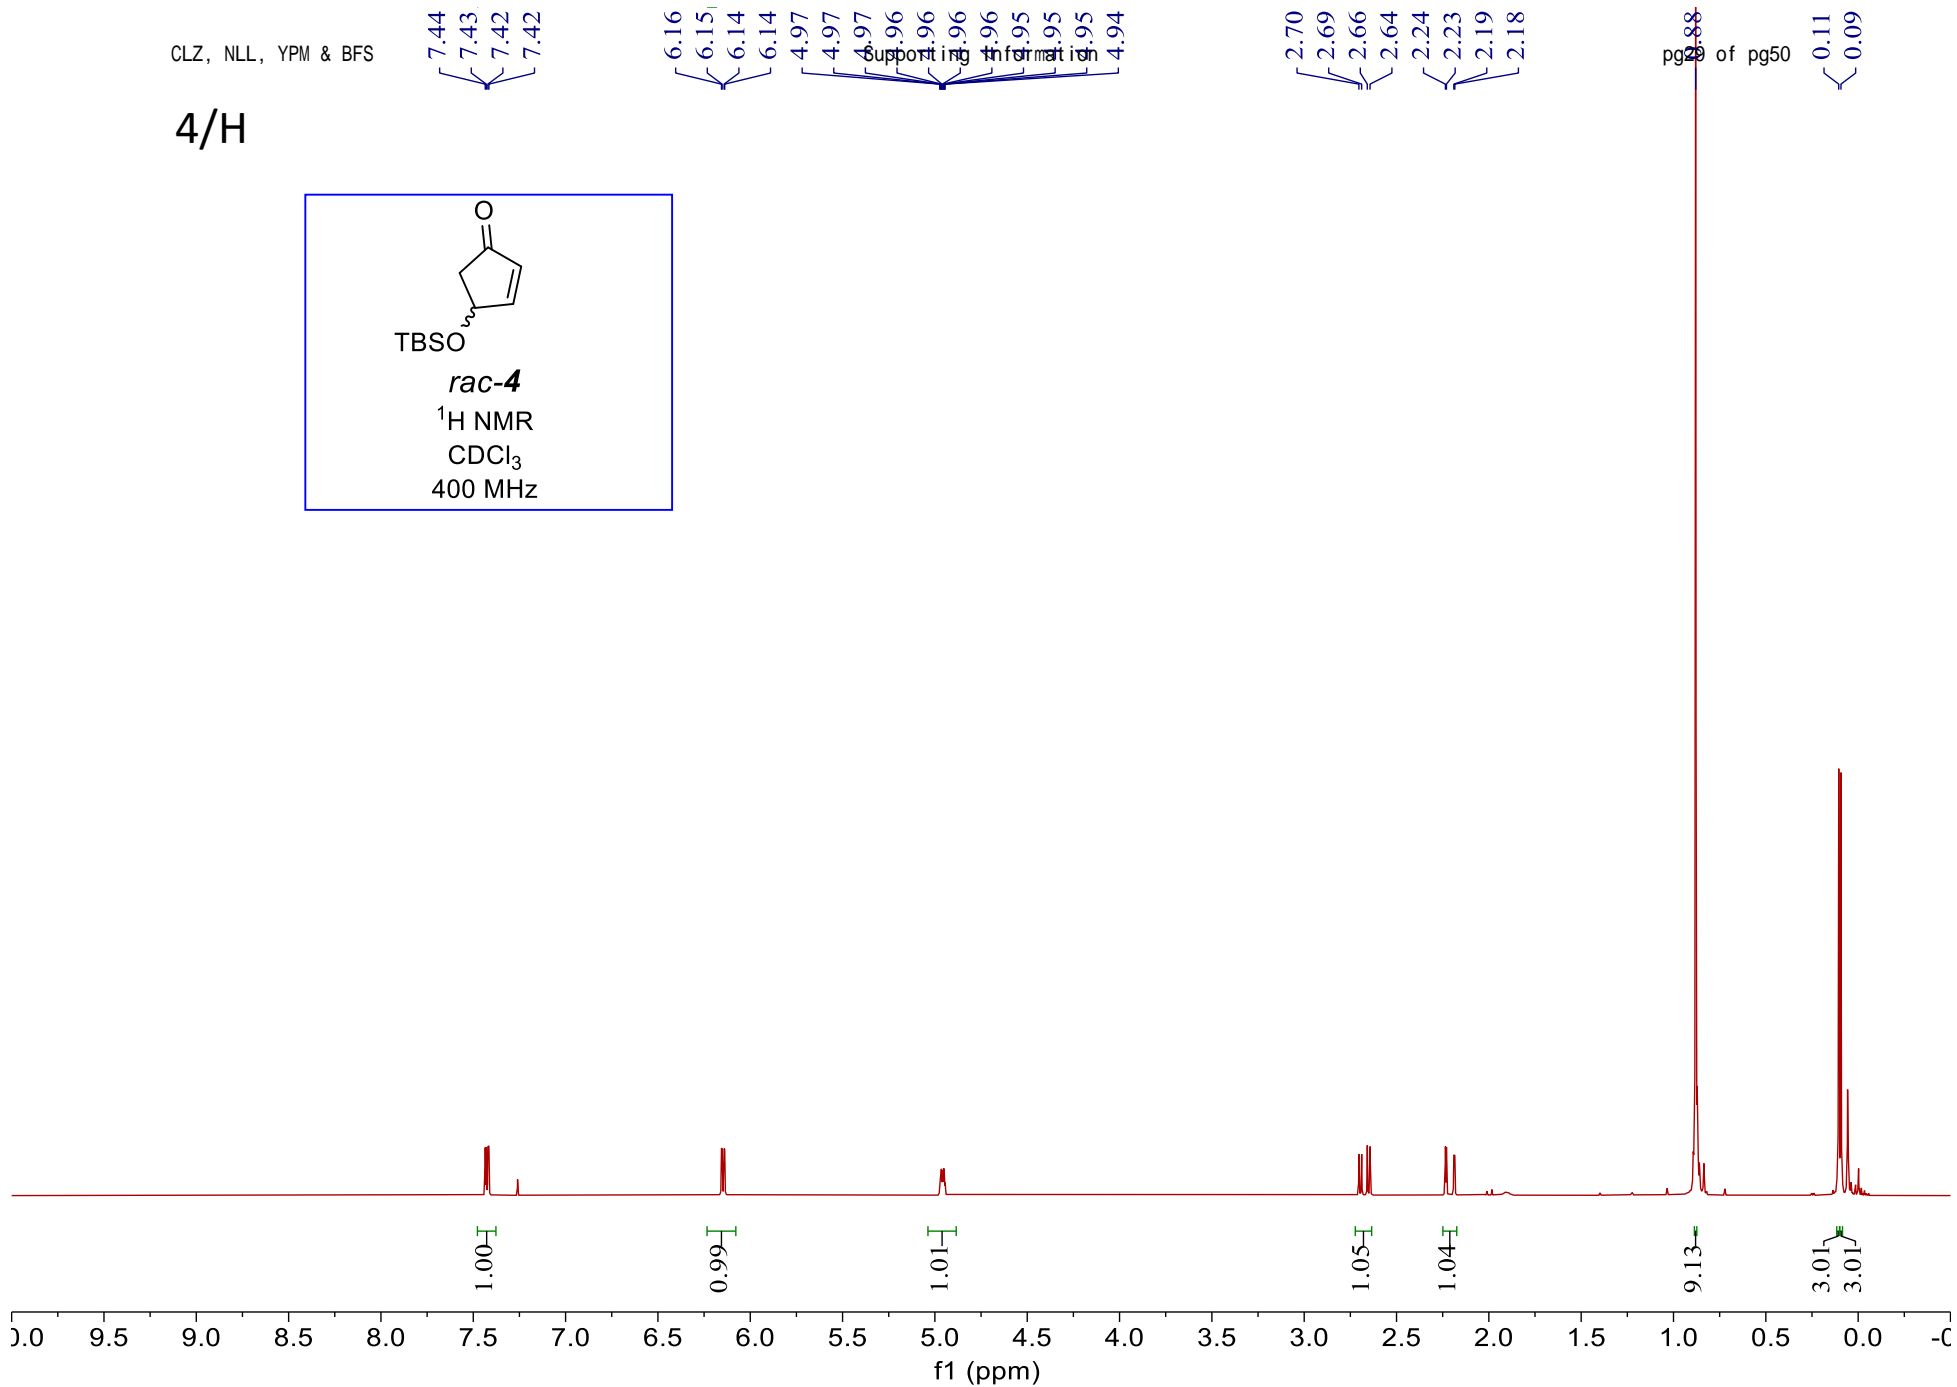

— 206.43

CLZ, NLL, YPM &amp; BFS

4/C

— 163.88

— 134.44

Supporting Information

— 70.85

— 44.94

— 25.75

— 18.08

pg30 of pg50

— 47.1  
— 4.74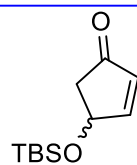*rac-4* $^{13}\text{C}$  NMR $\text{CDCl}_3$ 

101 MHz

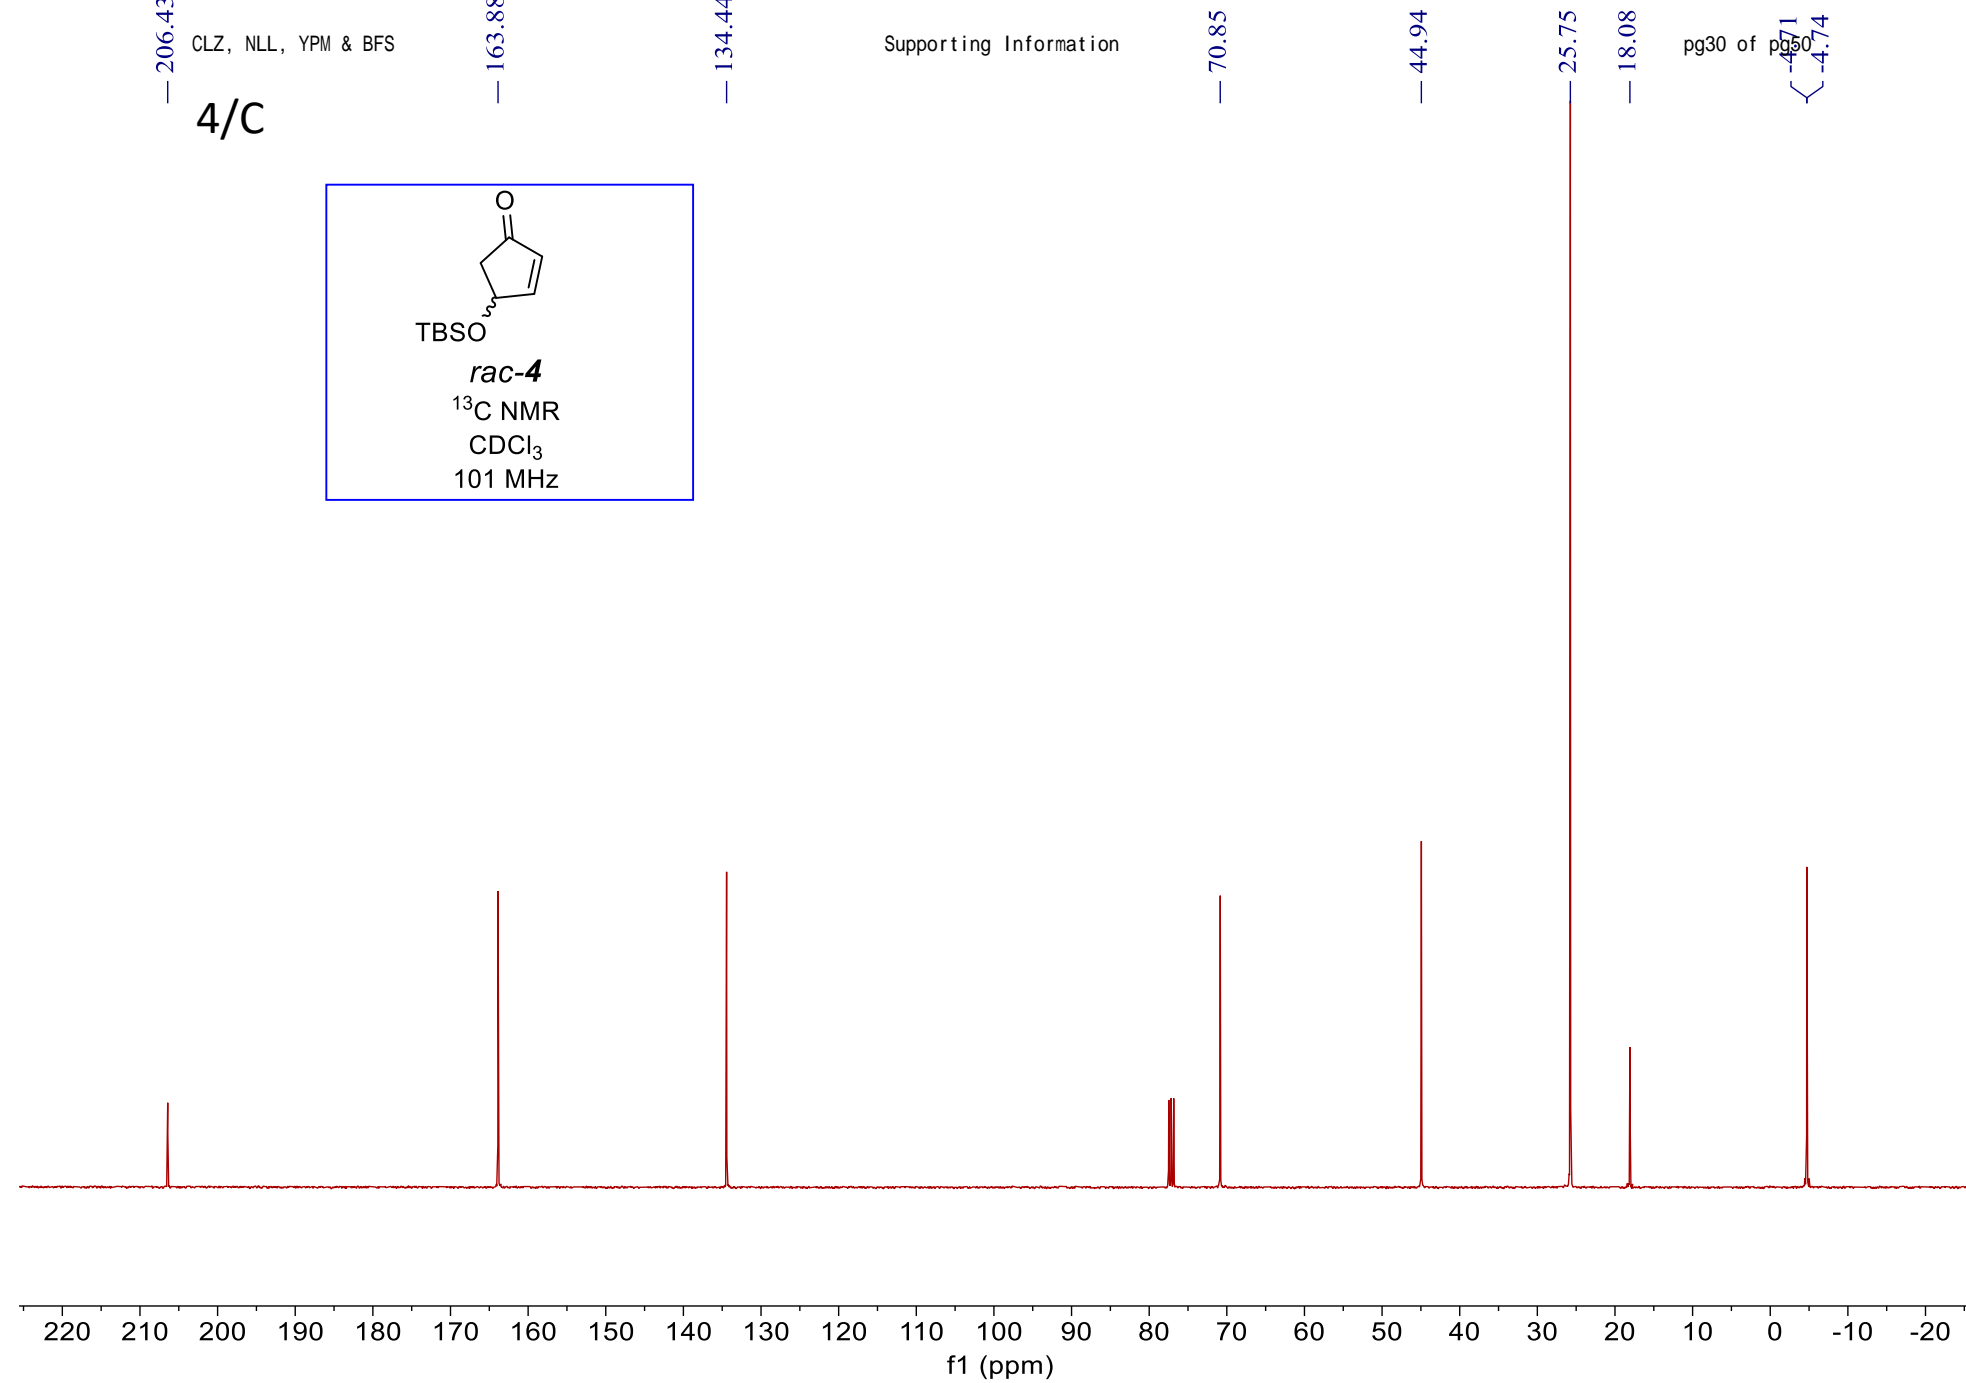

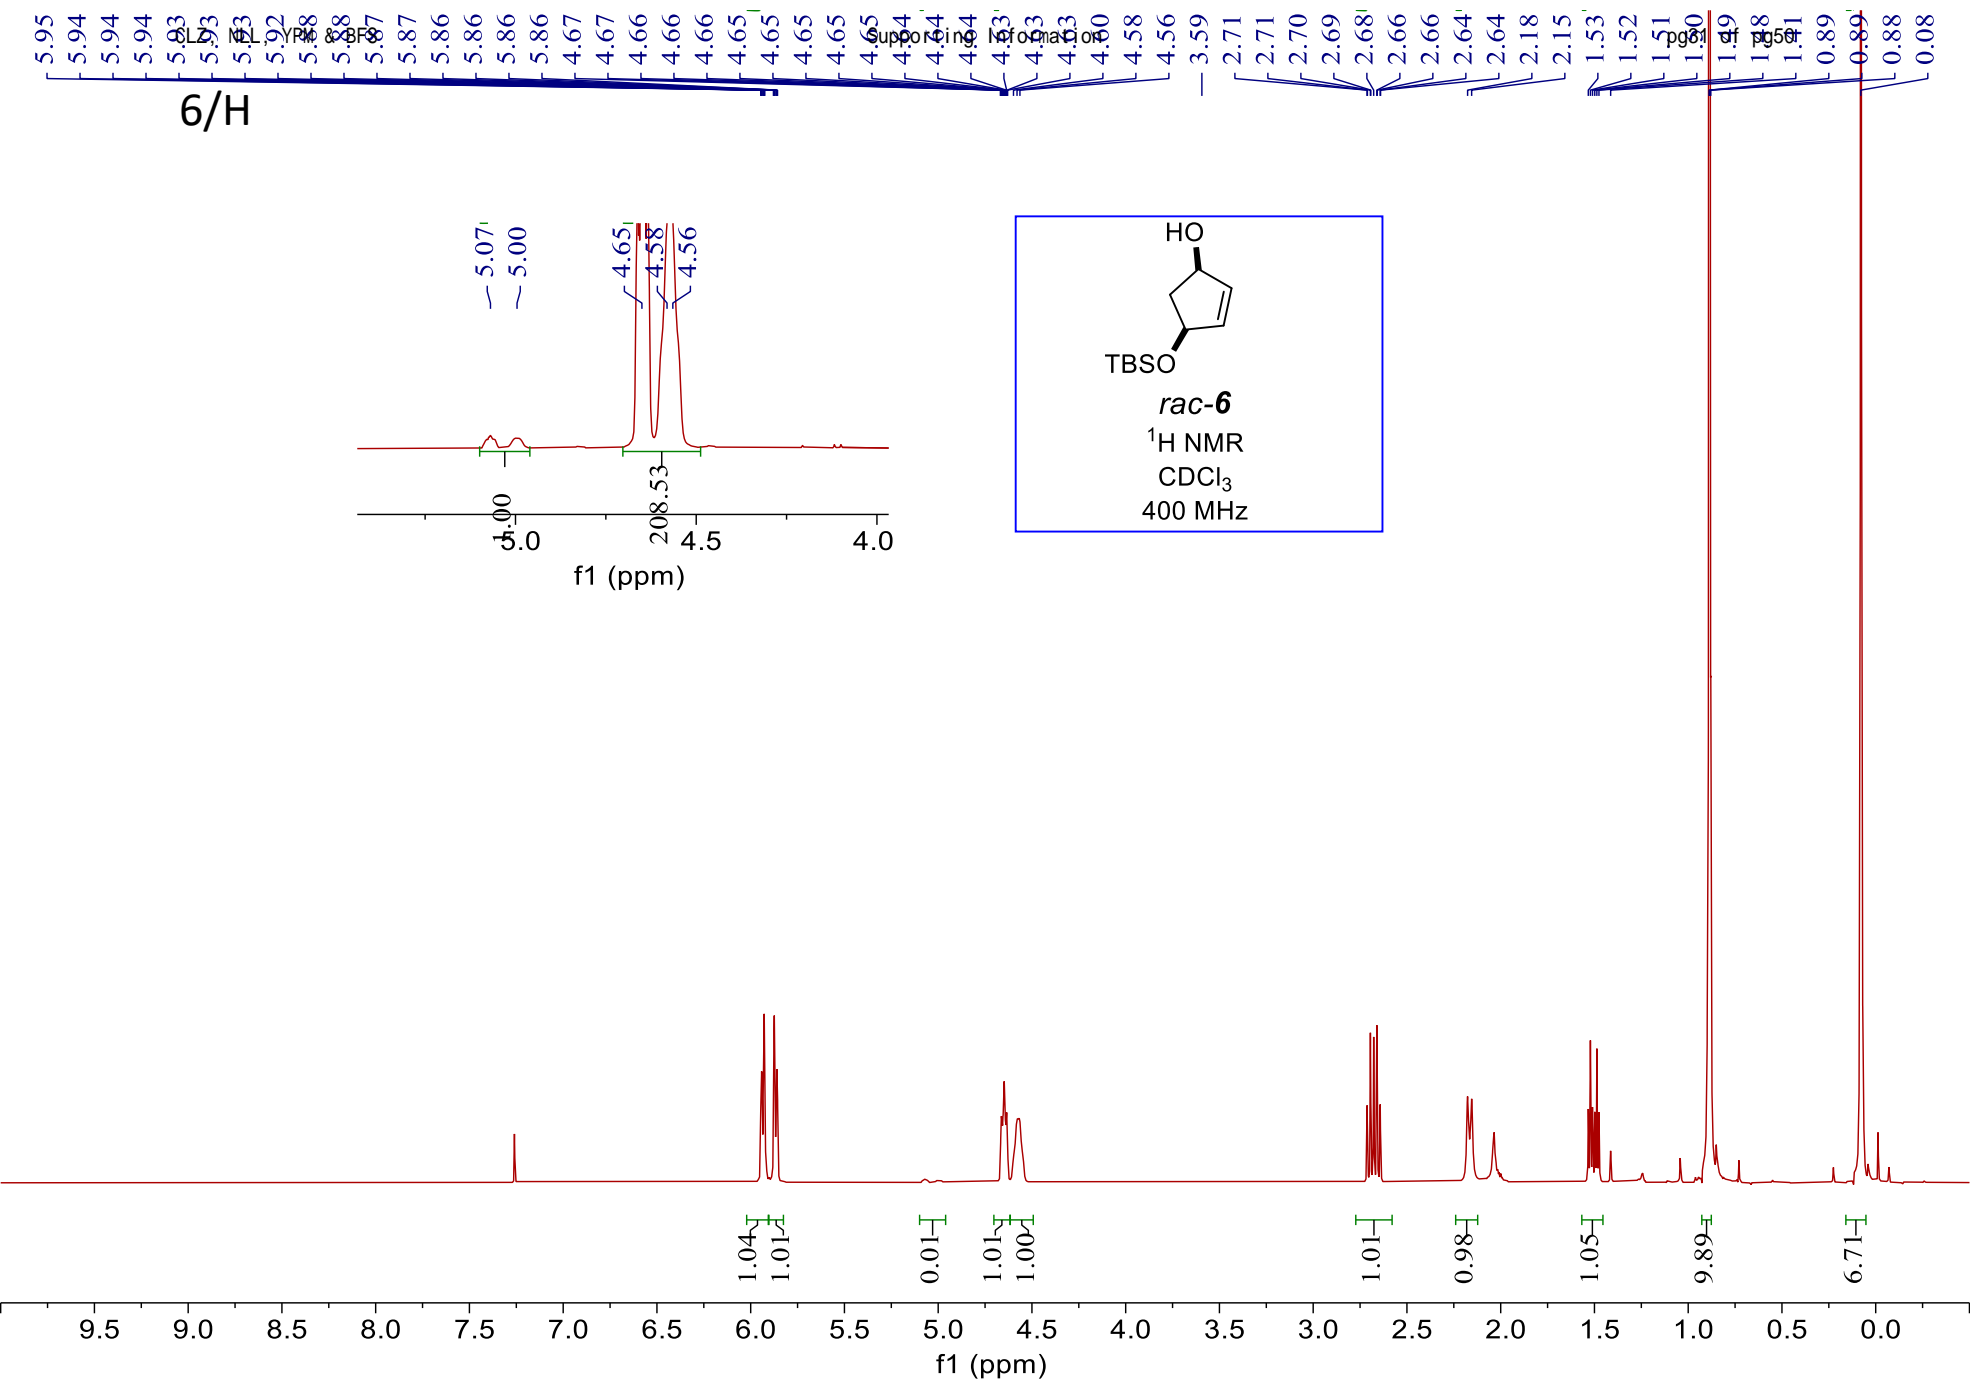

6/C

136.96  
135.7975.27  
75.24

44.73

26.02

18.21

-4.53  
-4.55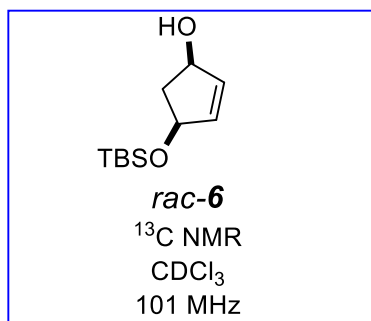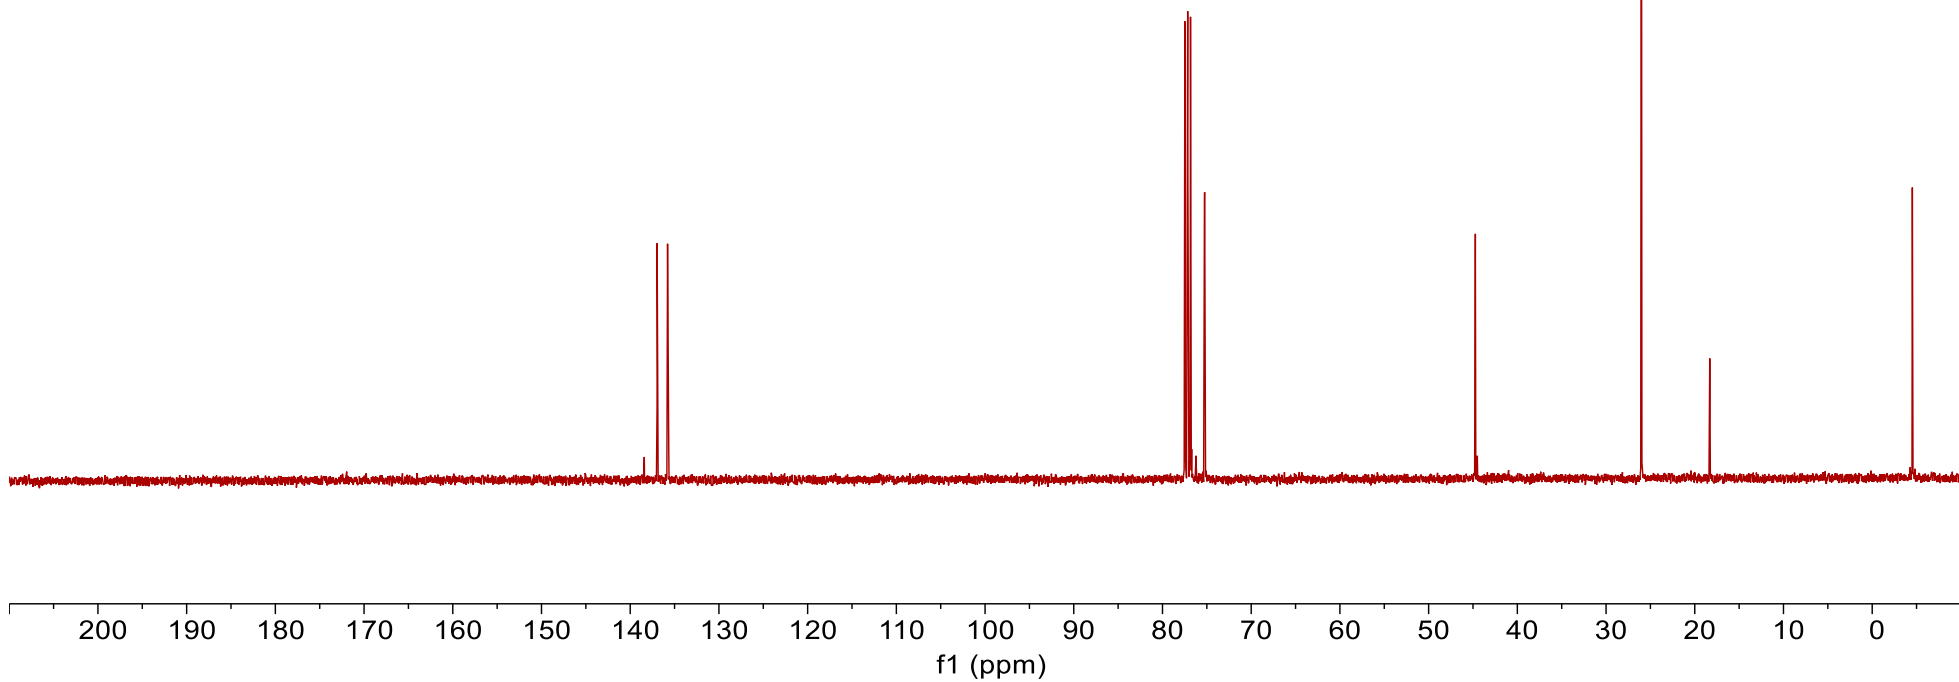



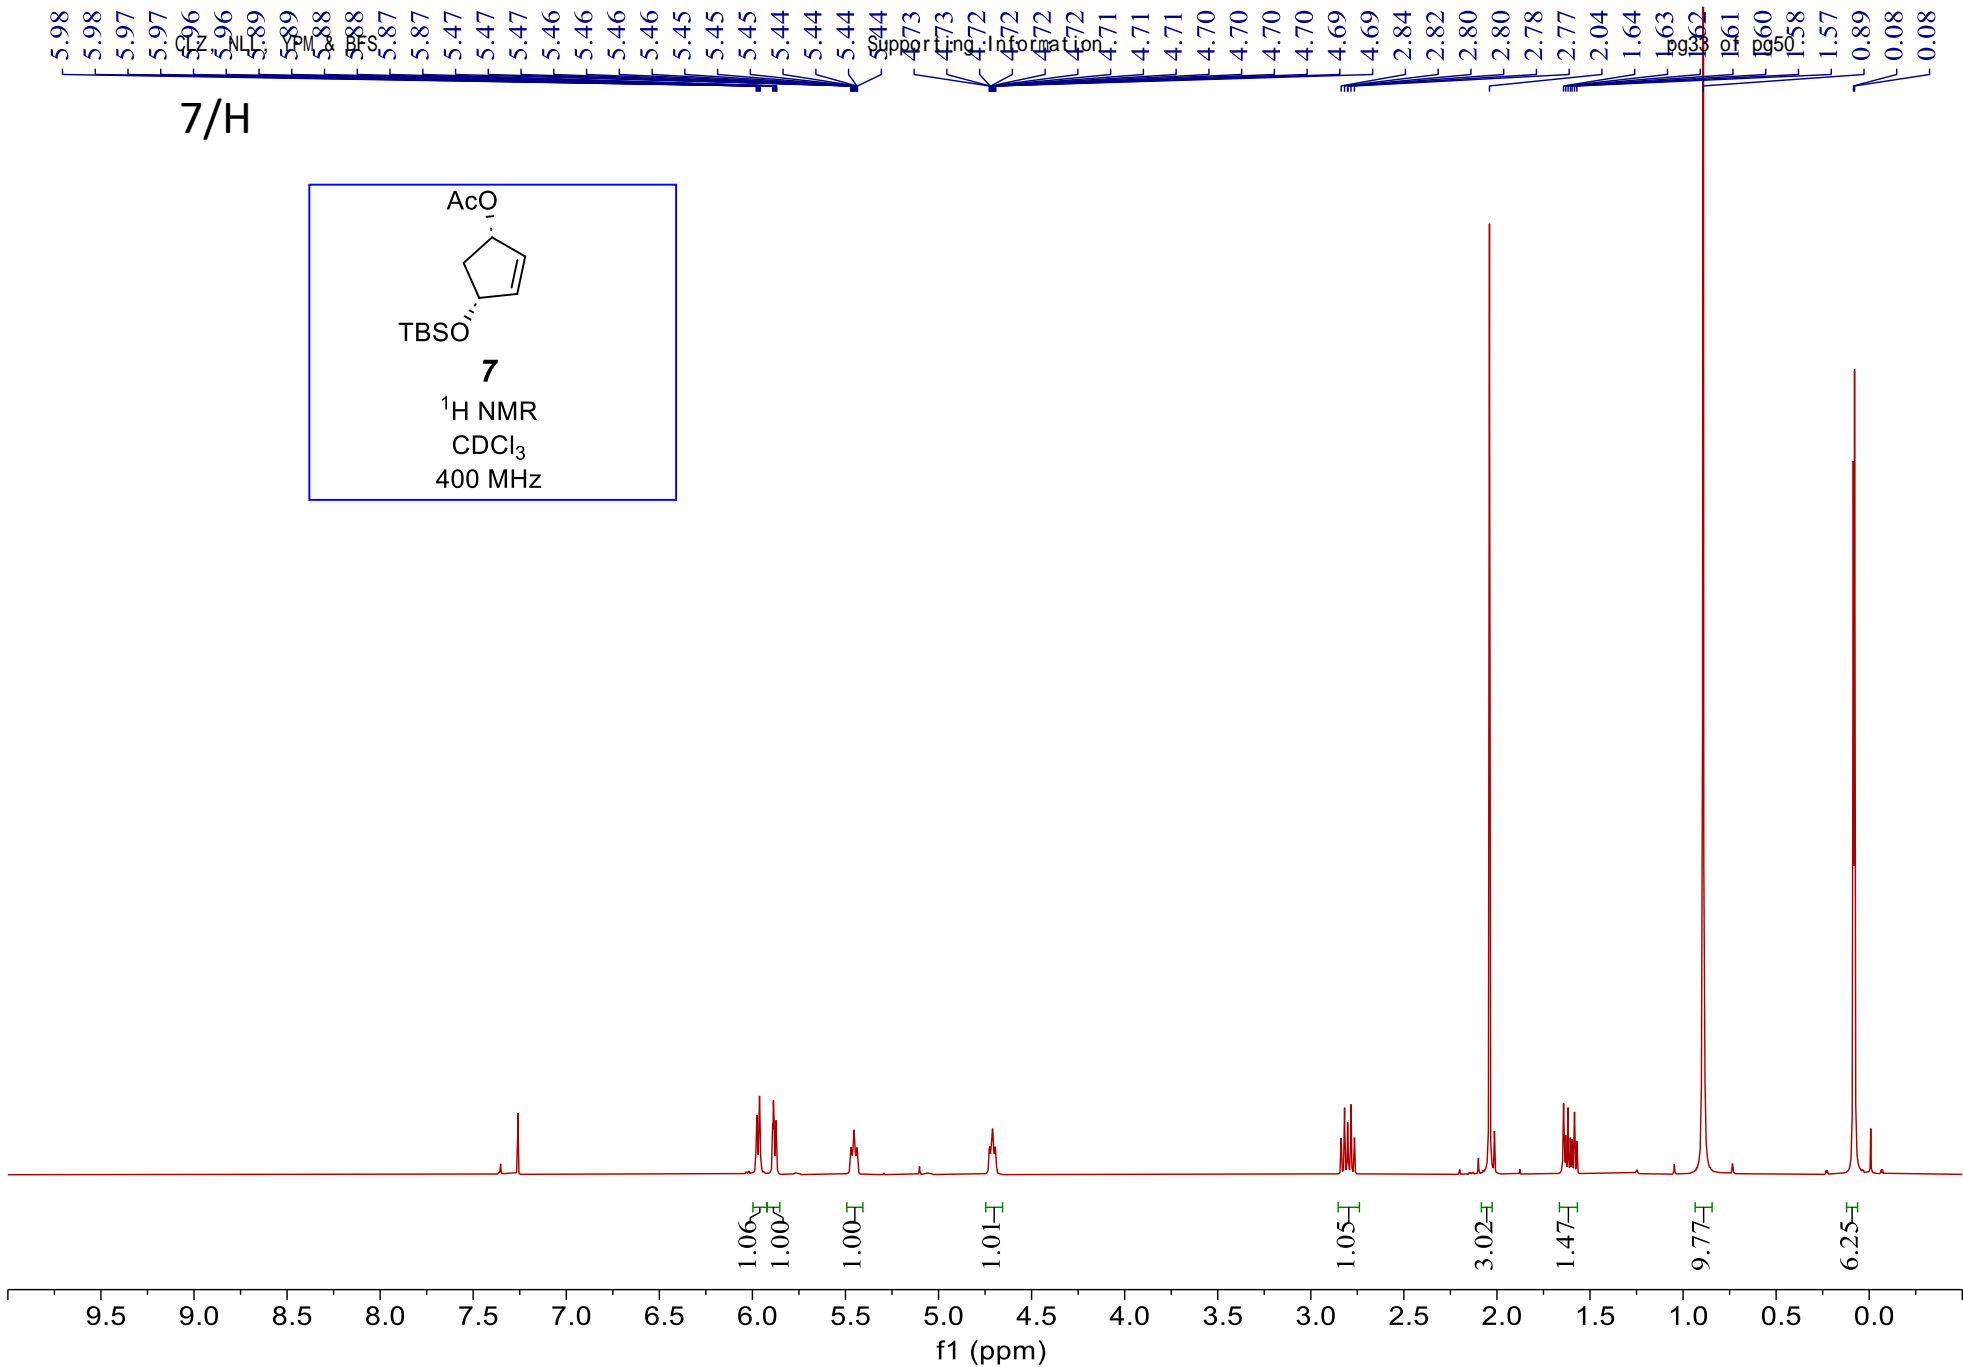

$7/C$ 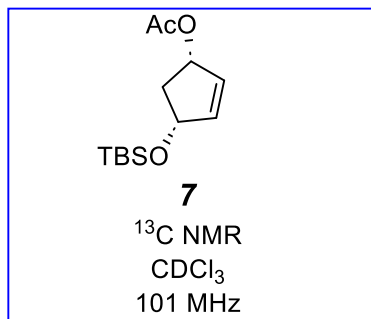

— 171.03

— 139.02

— 131.27

~ 77.06

~ 74.97

— 41.27

— 25.98

~ 21.31

— 18.29

~ 4.52

~ 4.57

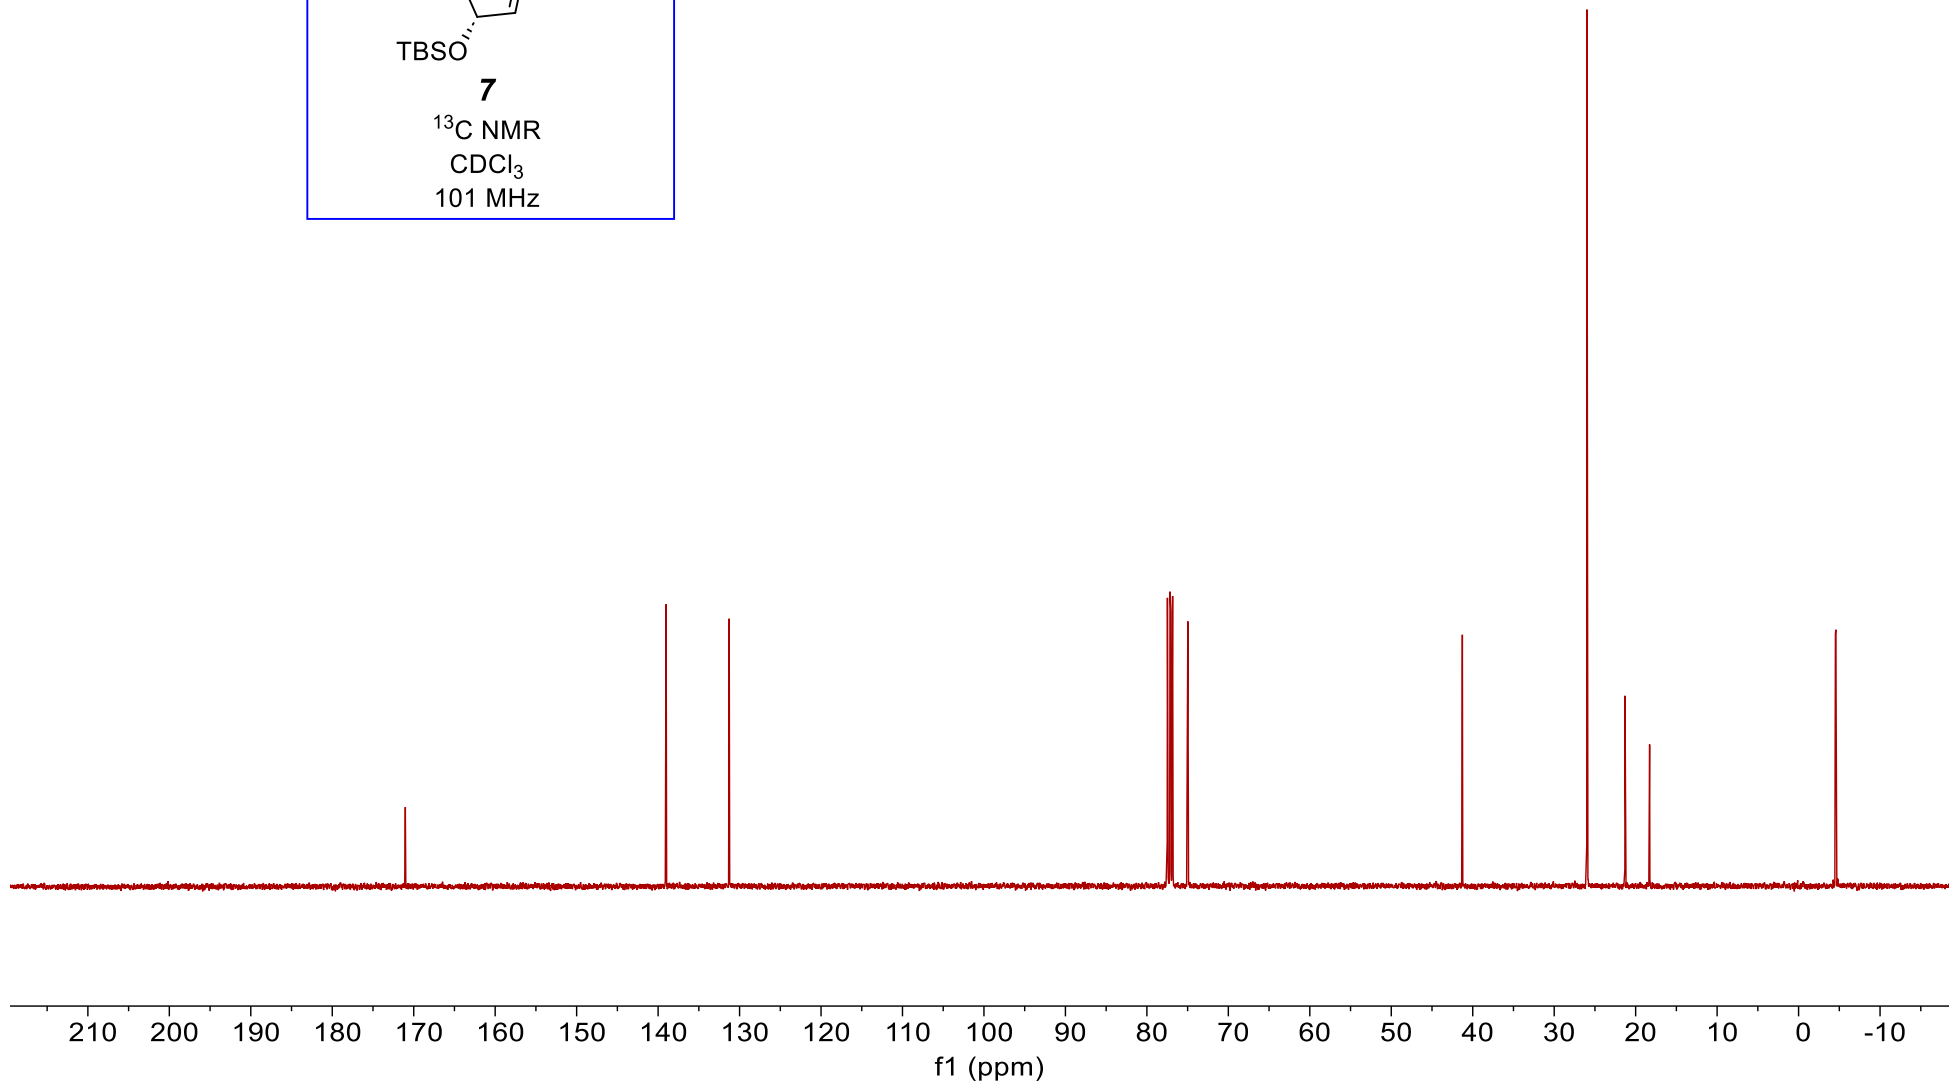

3/H

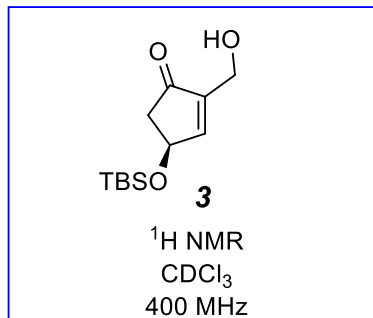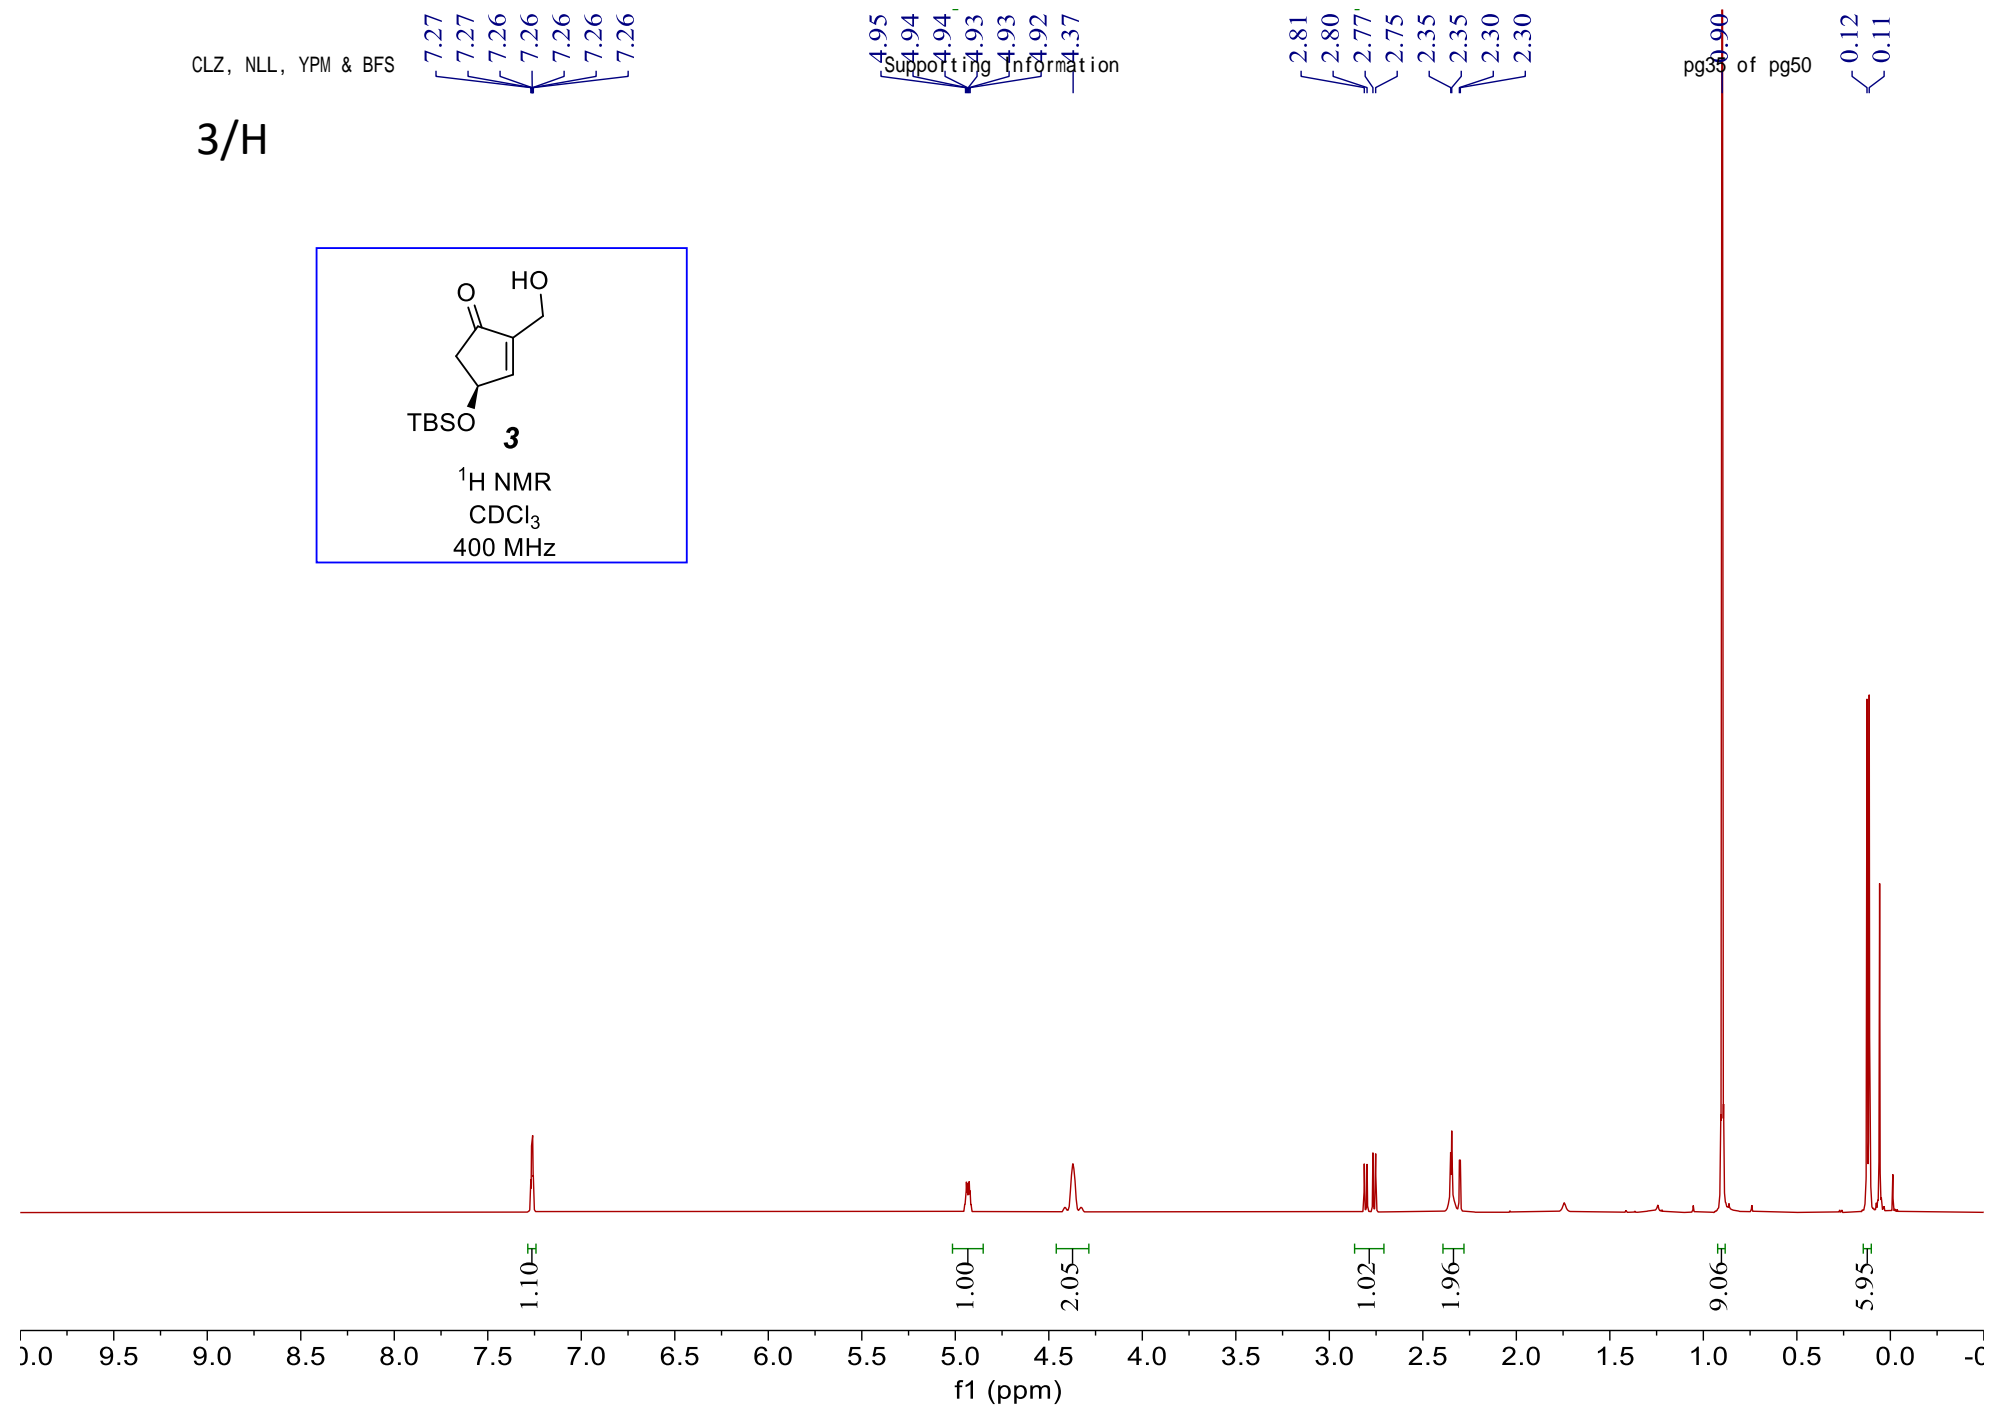

— 206.15

CLZ, NLL, YPM &amp; BFS

— 157.72

— 145.66

Supporting Information

— 69.17

— 57.37

— 46.01

— 25.86

— 18.22

— -4.63

pg36 of pg50

**3/C**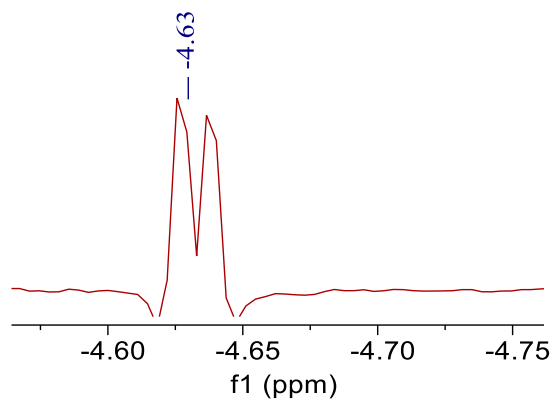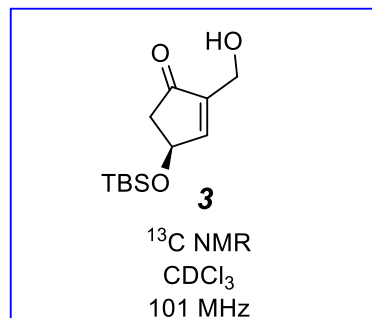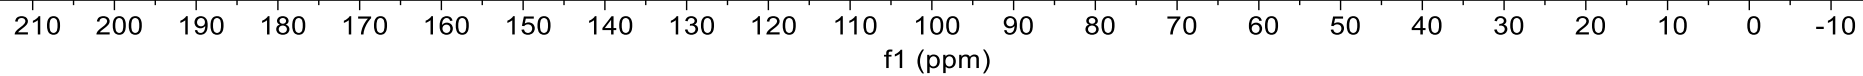

S1/H

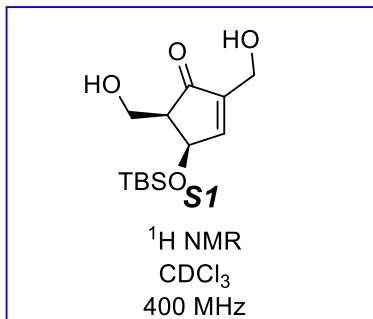

Supporting Information

pg37 of pg50

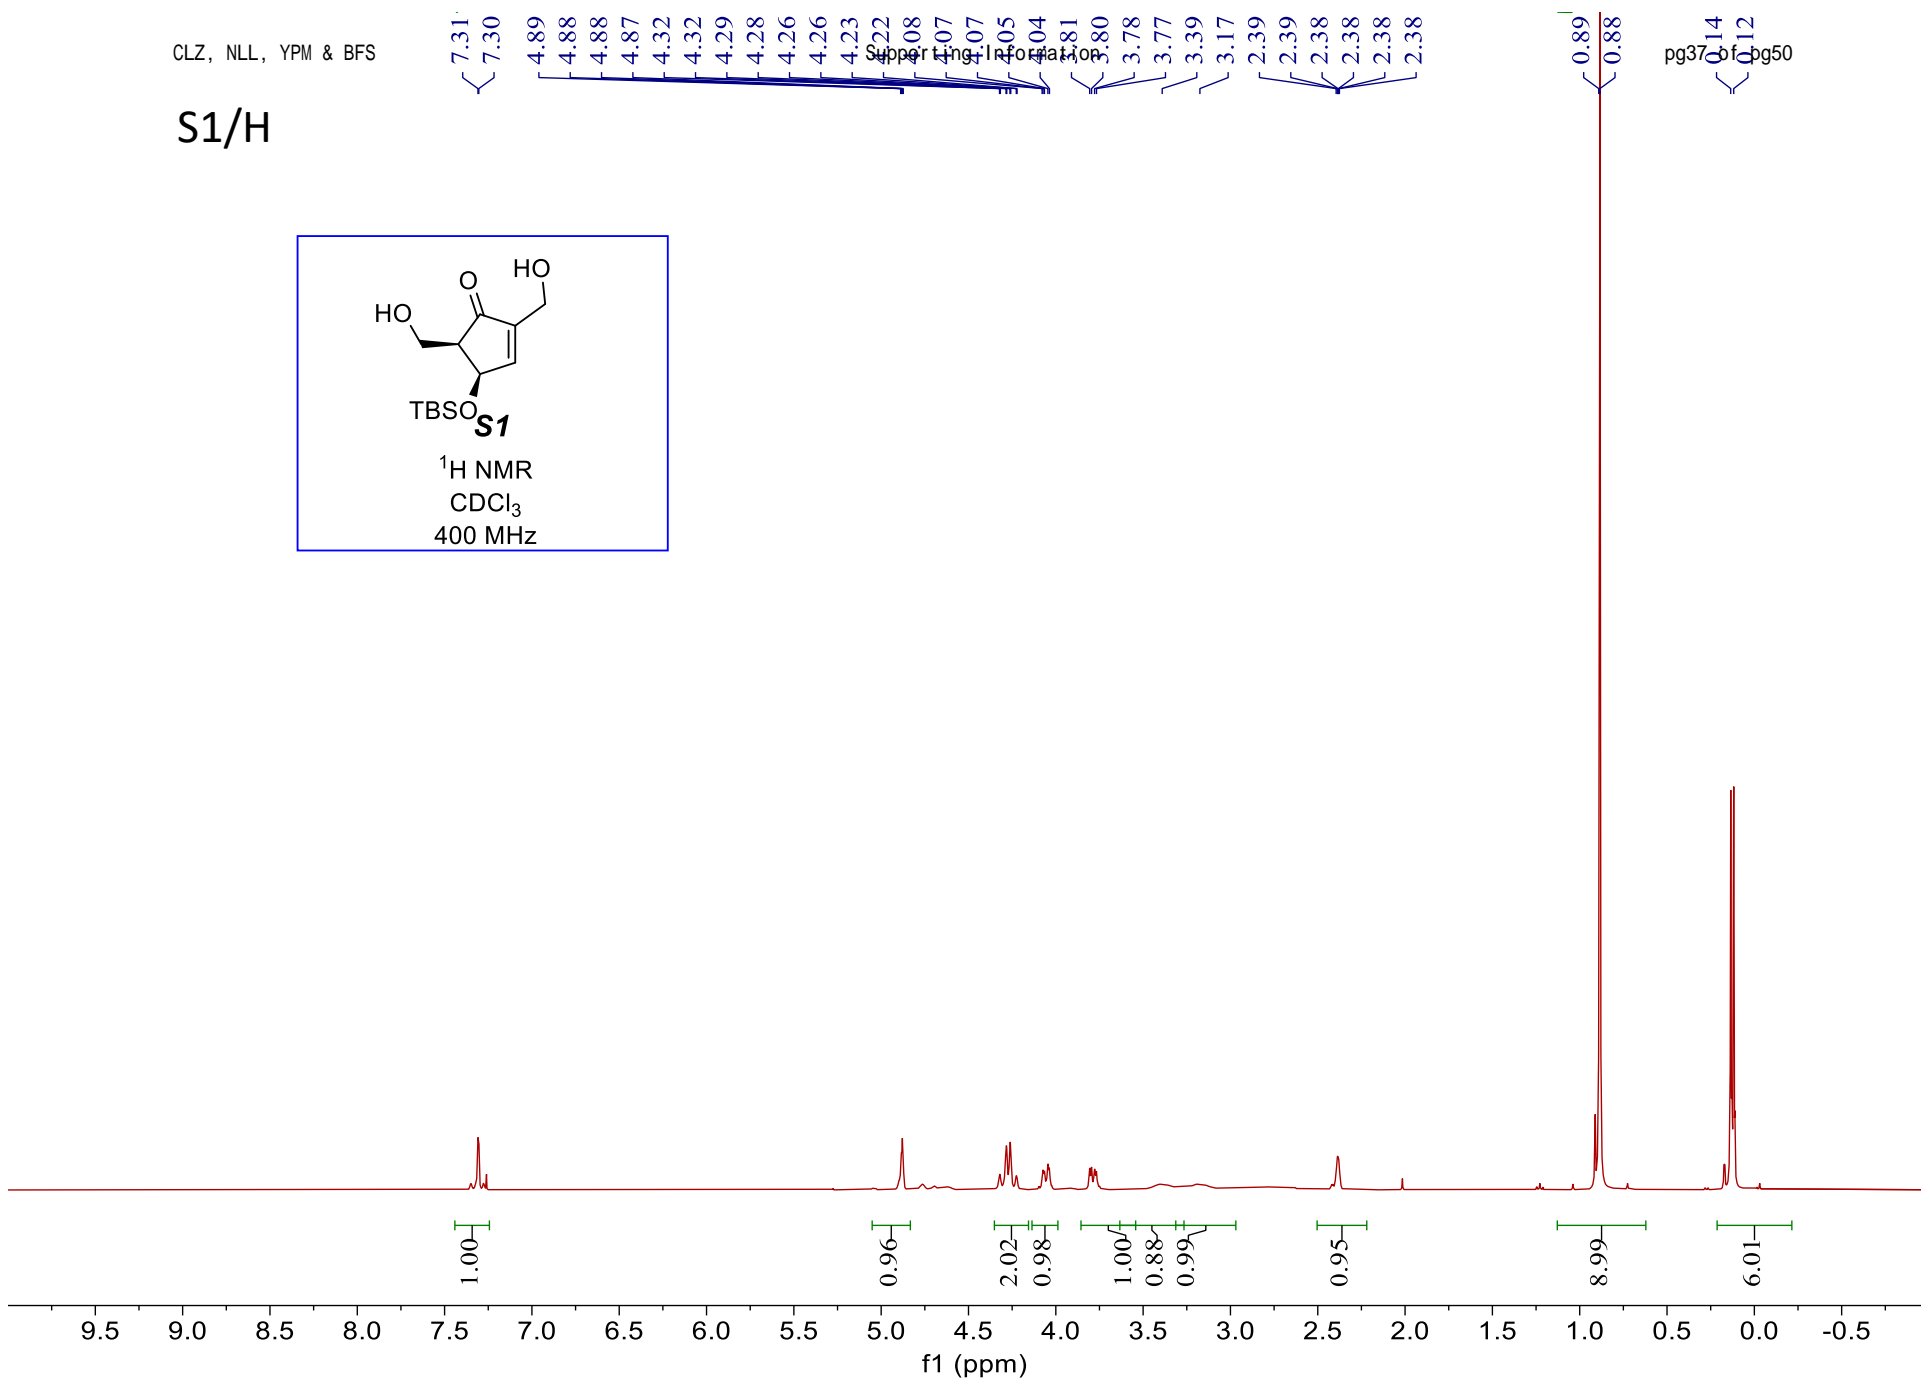

— 206.92

CLZ, NLL, YPM & BFS

S1/C

— 158.57

— 145.61

Supporting Information

— 71.61

— 58.86

— 58.82

— 56.67

— 25.82

— 18.10

— 4.54

— 4.61

pg38 of pg50

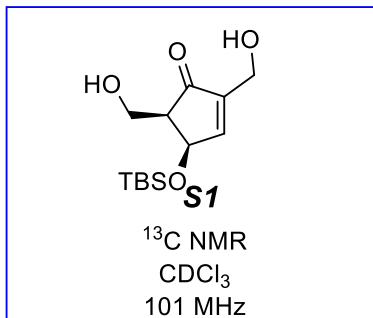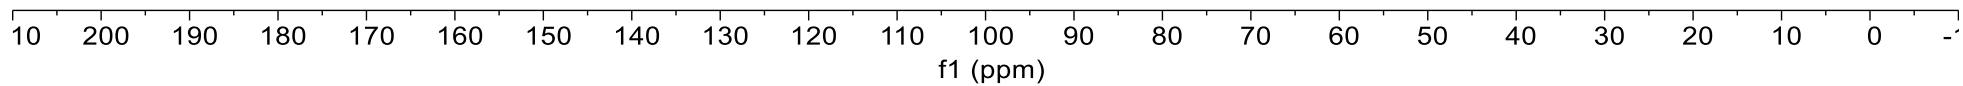

2/H

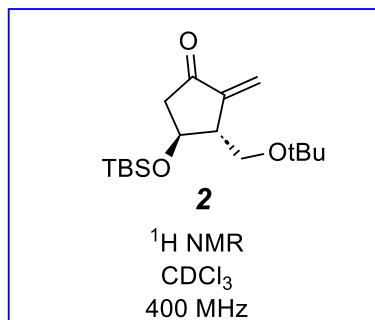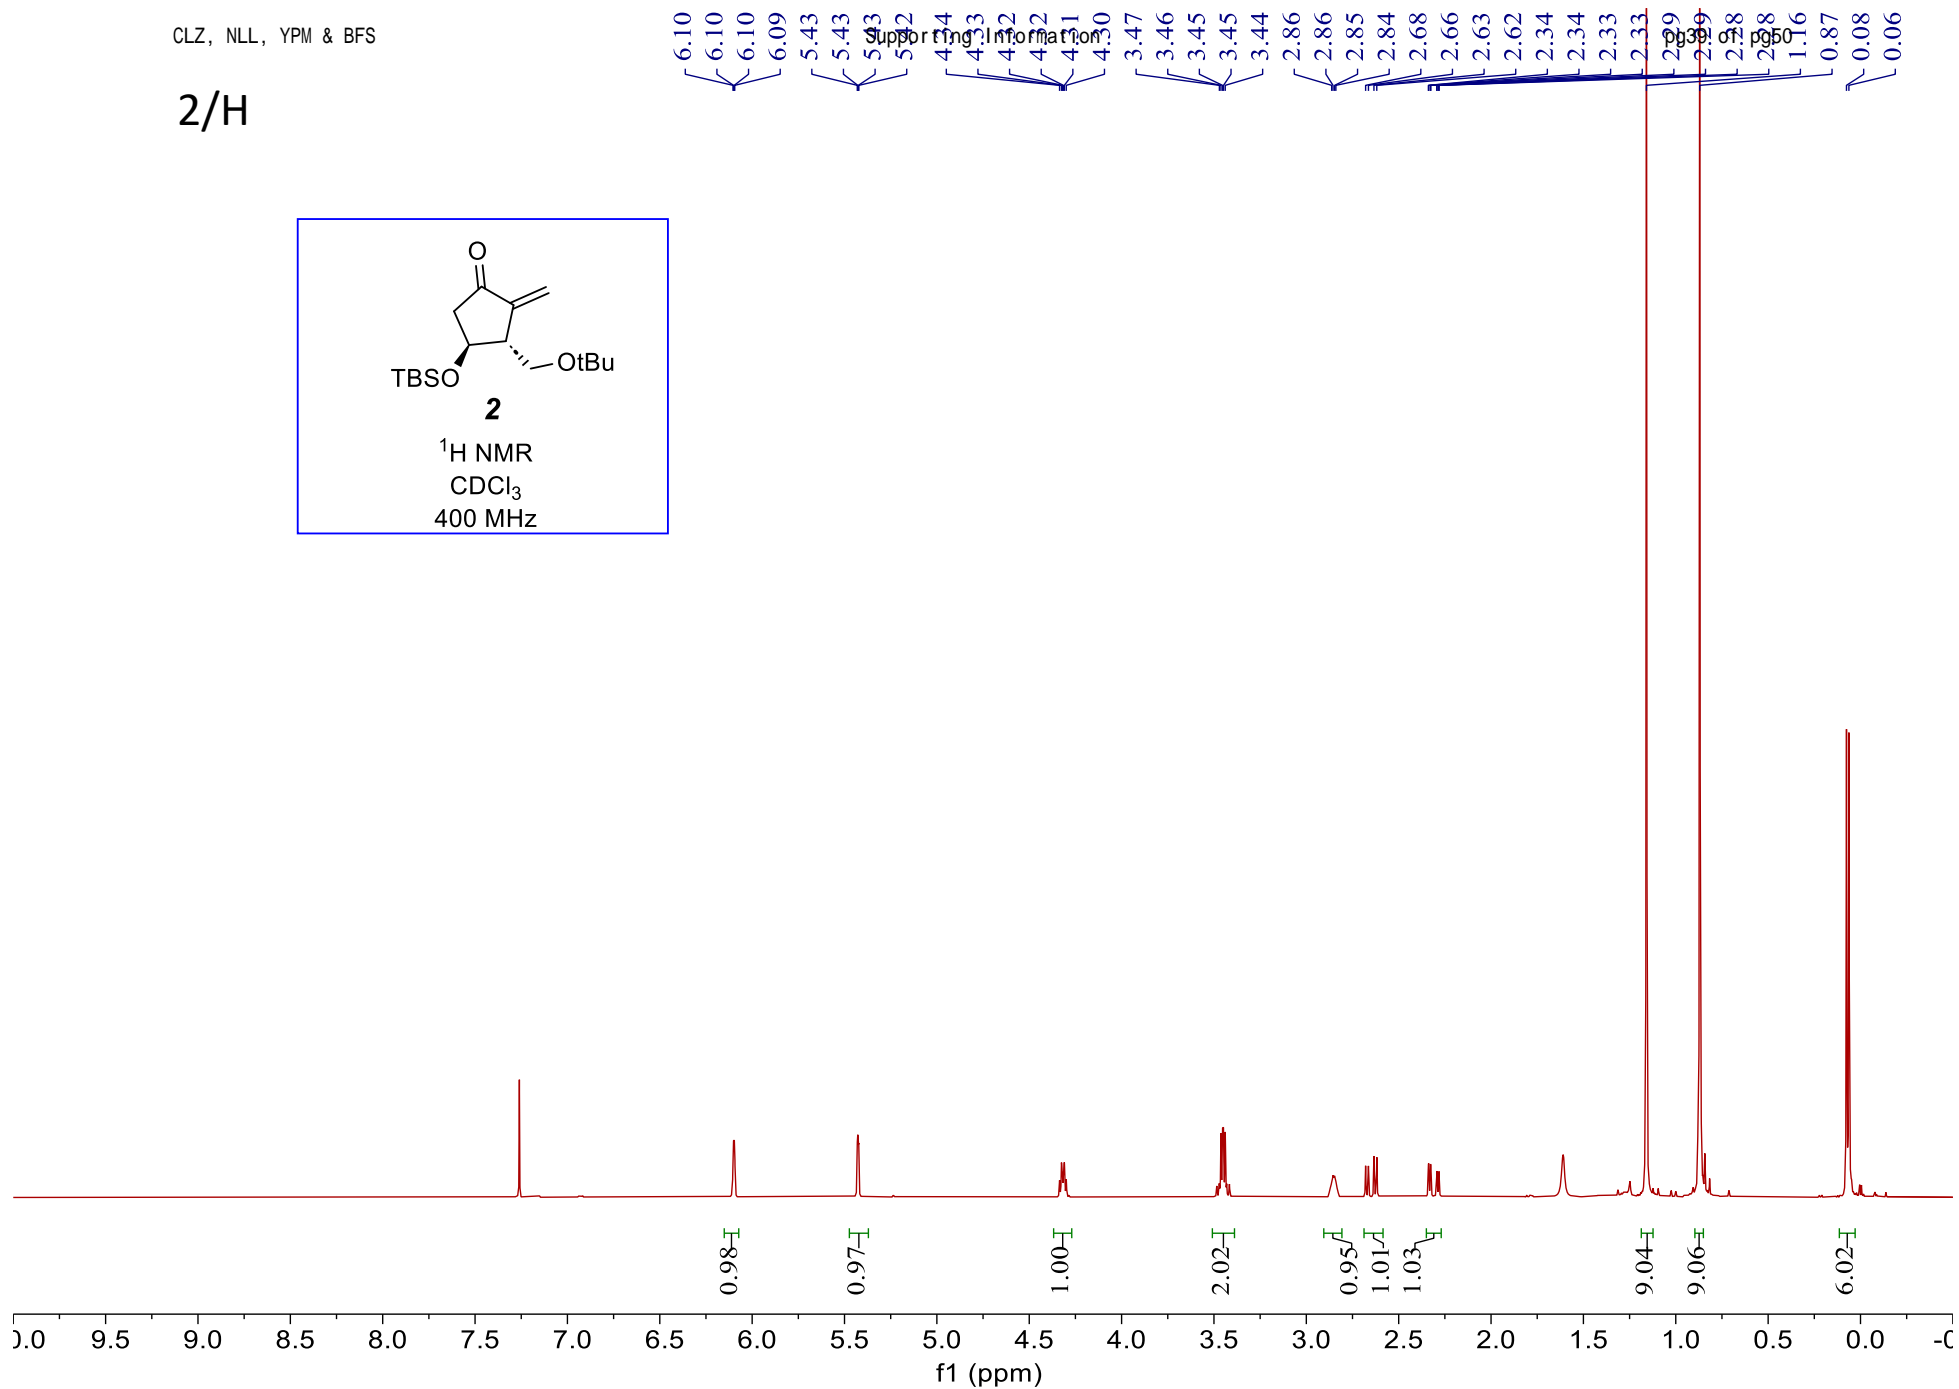

— 205.10

CLZ, NLL, YPM &amp; BFS

2/C

— 145.61

— 119.06

Supporting Information

~ 73.00

~ 69.67

~ 62.39

— 52.07

— 47.47

~ 27.51

~ 25.89

~ 18.17

pg40 of pg50

~ -4.51

~ -4.67

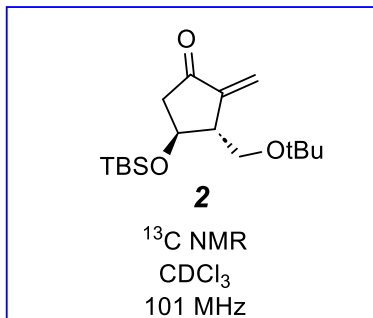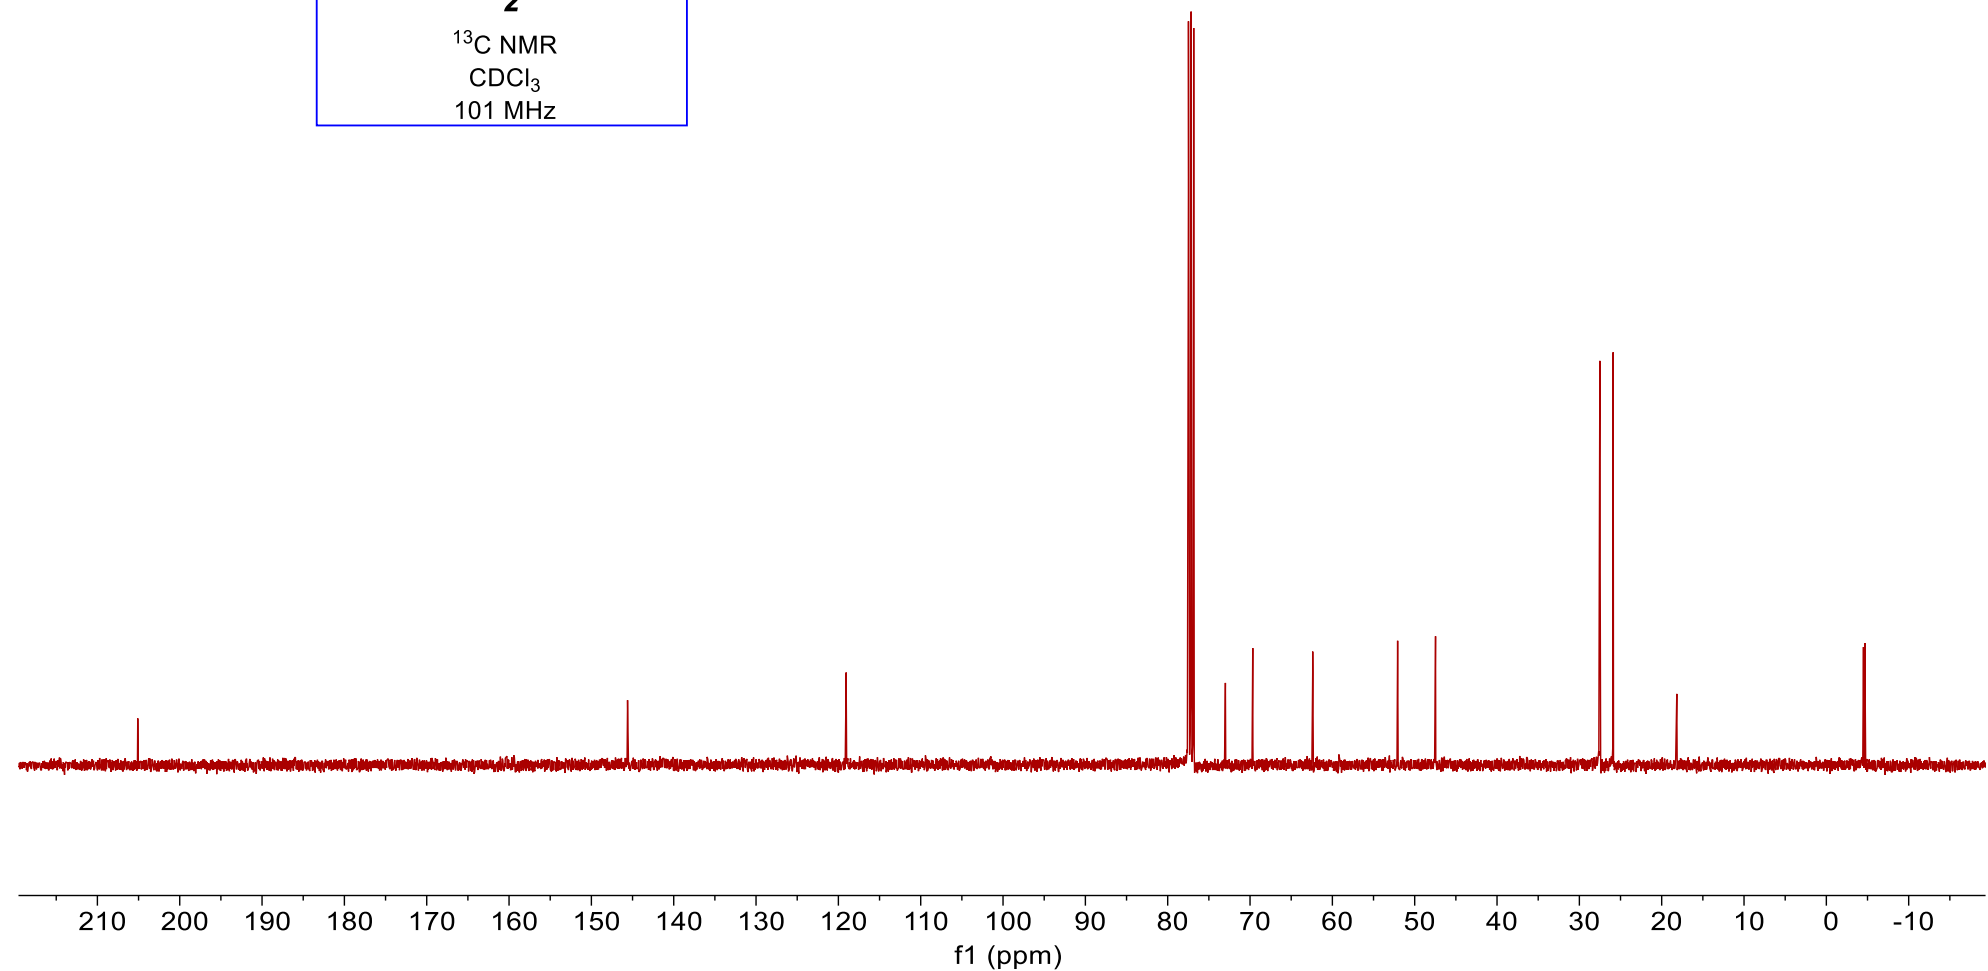



8/H

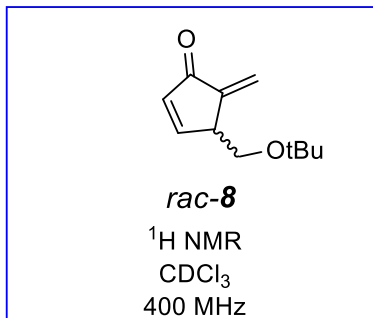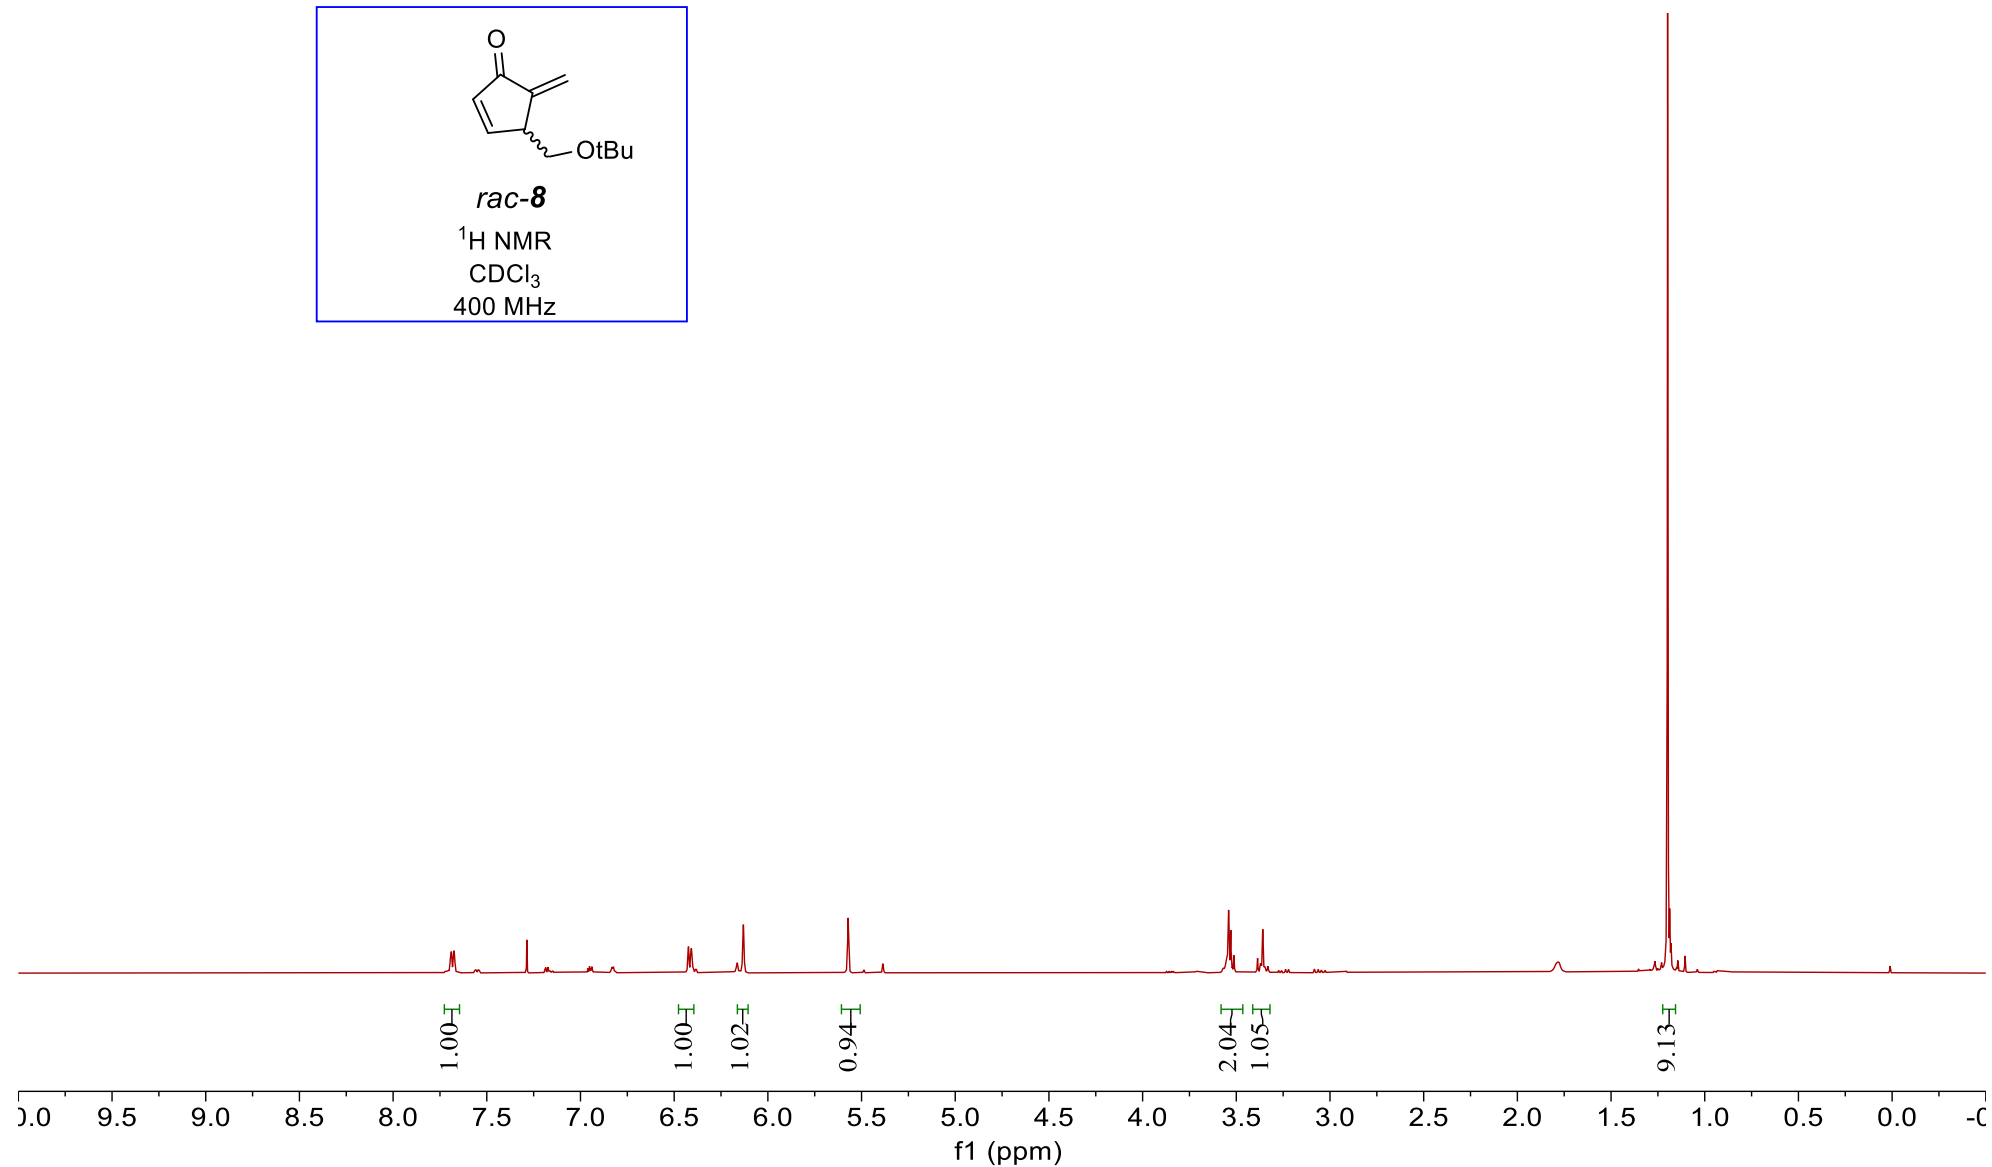

196.68  
8/C

— 160.90

— 143.44

— 135.71

— 117.70

— 73.37

— 63.99

— 45.80

27.53  
27.52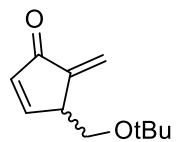***rac-8***<sup>13</sup>C NMRCDCl<sub>3</sub>

101 MHz

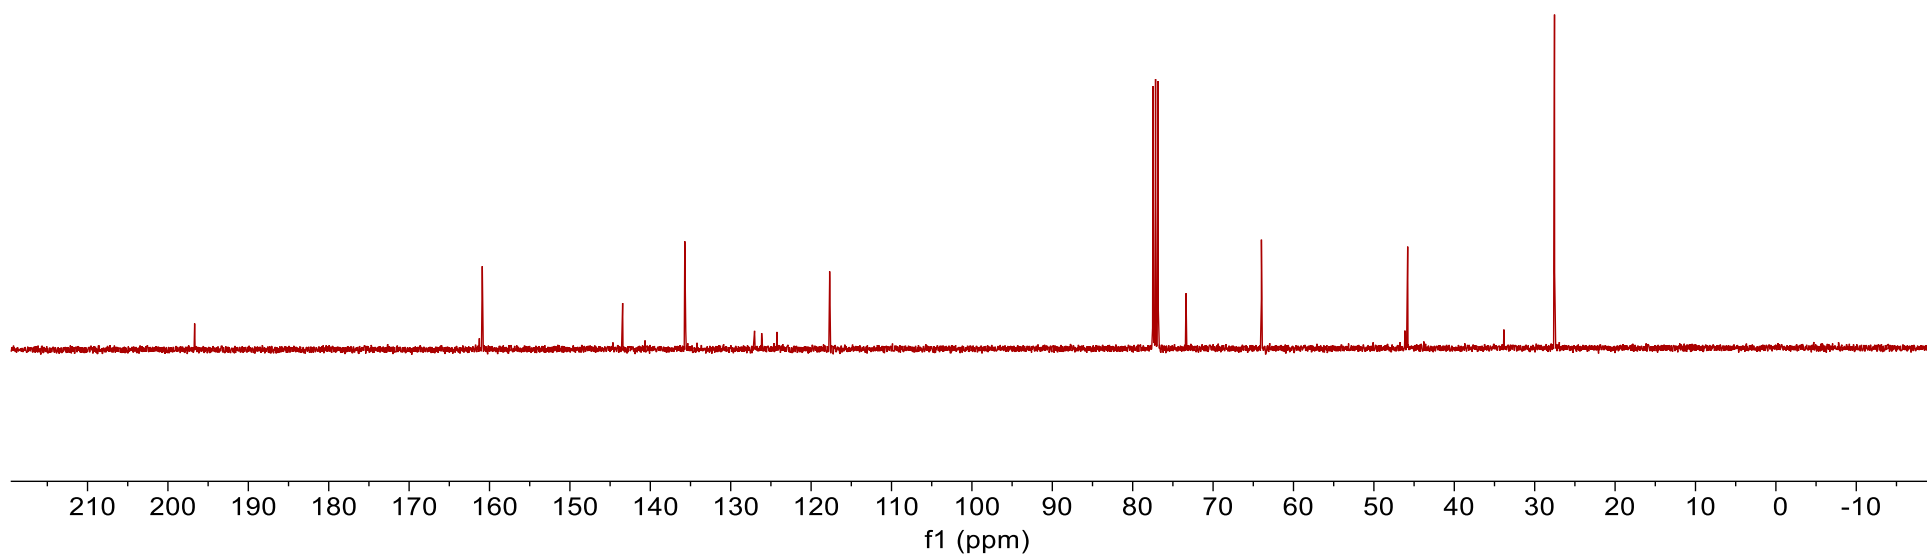

pg43 of pg50

9/H

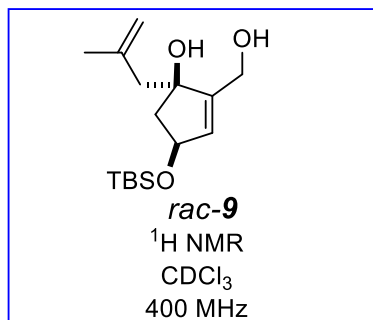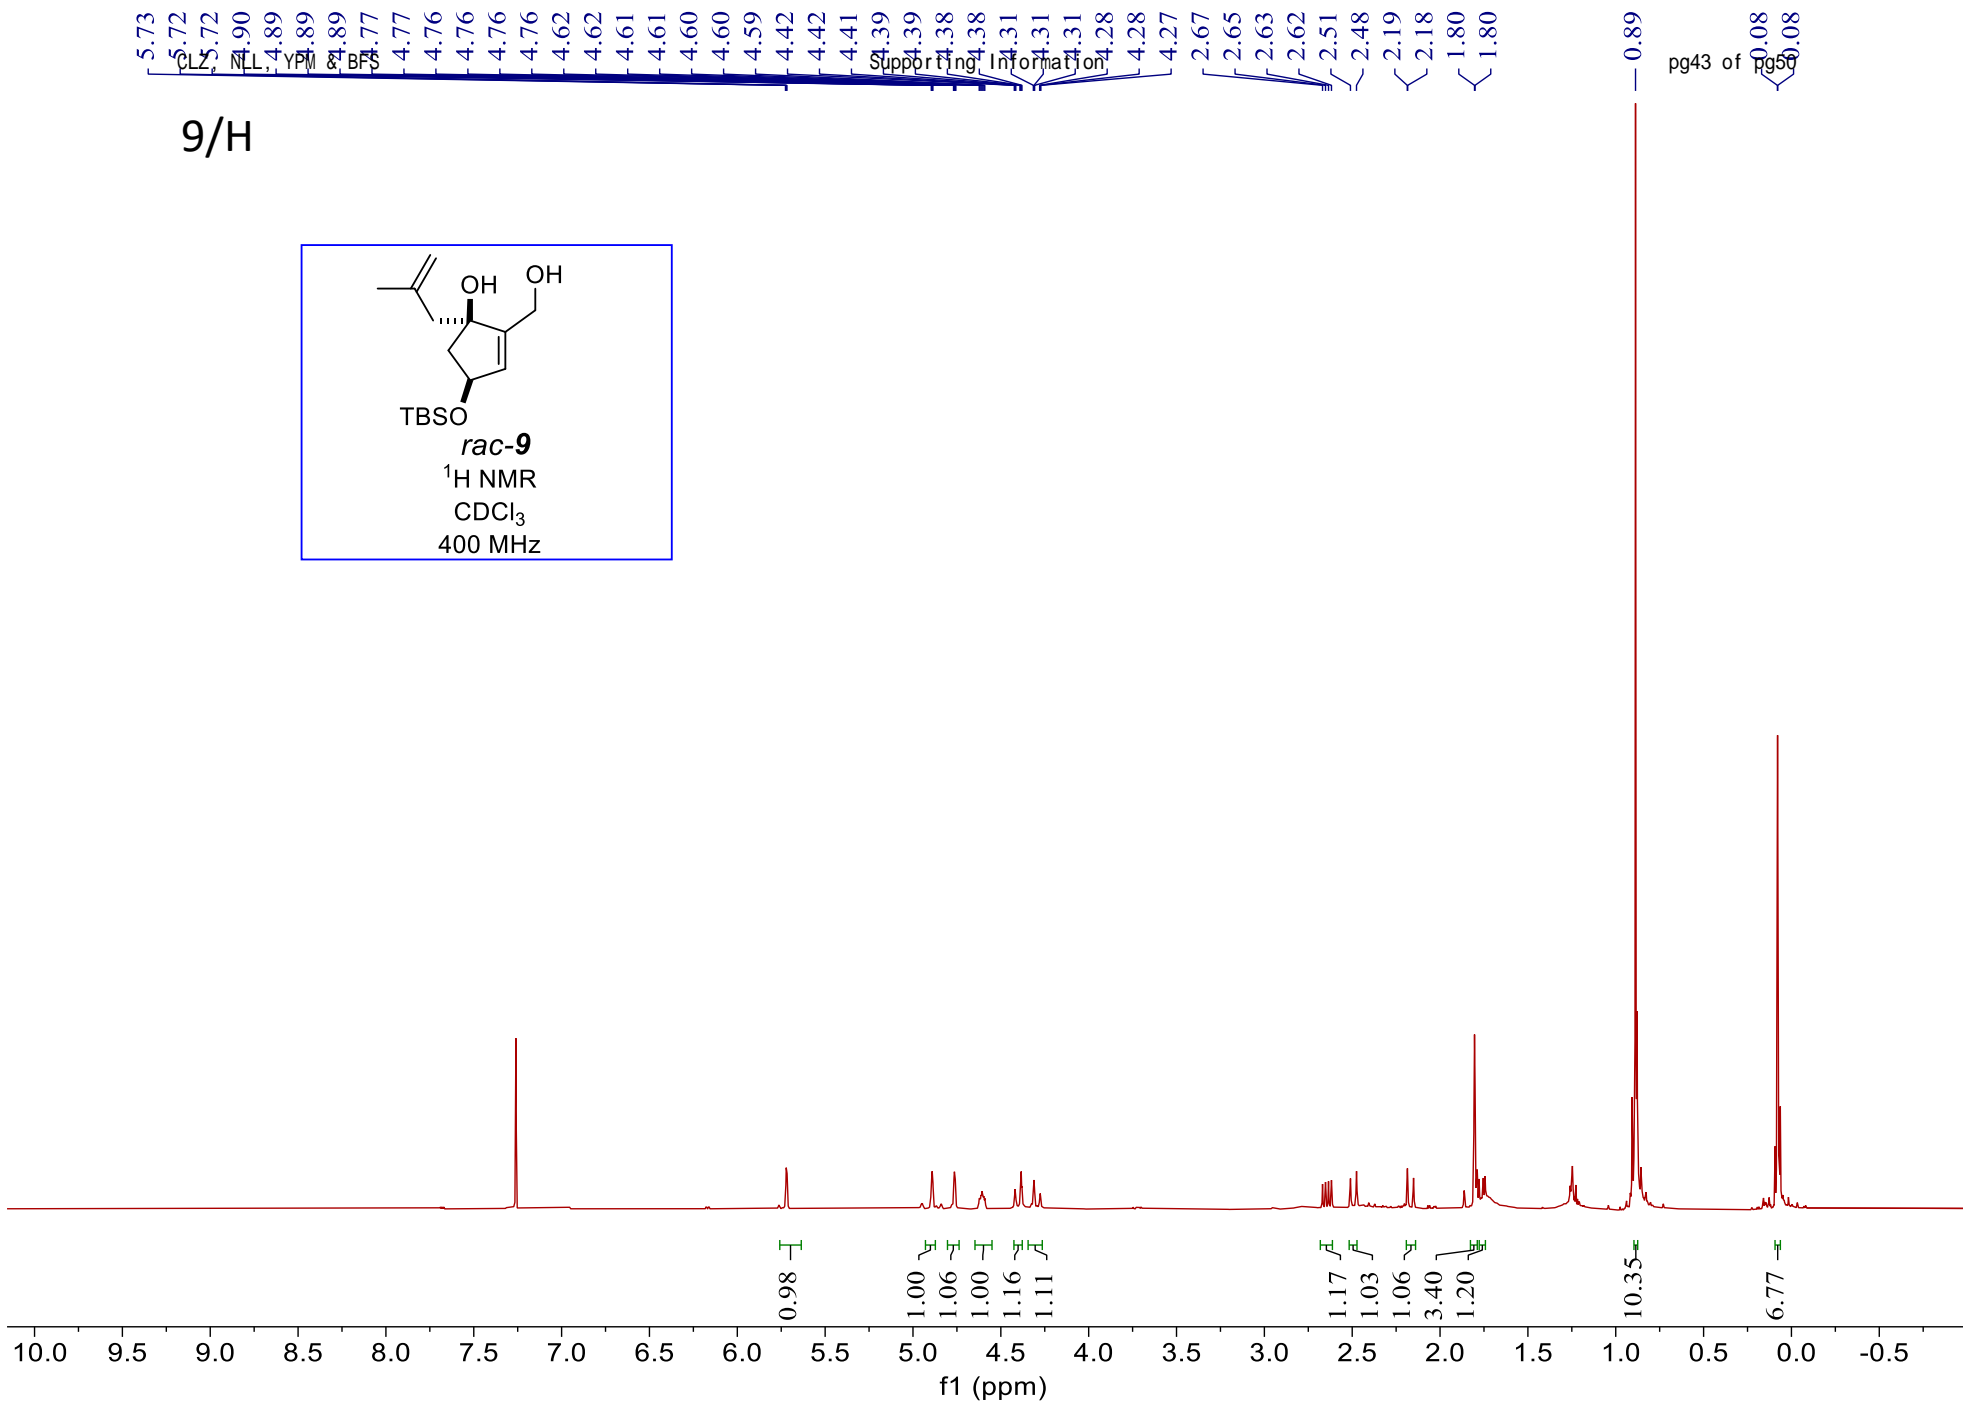

9/C

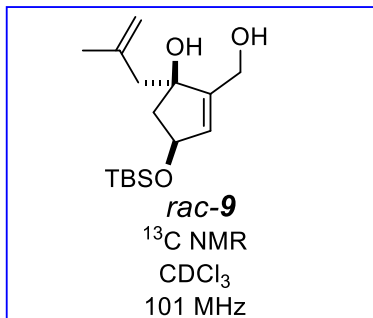

— 149.84 — 142.49 — 130.90 — 114.92 — 83.71 — 73.66 — 59.35 — 49.42 — 46.32 — 26.04 — 24.39 — 18.35 — -4.56

200 190 180 170 160 150 140 130 120 110 100 90 80 70 60 50 40 30 20 10 0 -10

f1 (ppm)

10/H

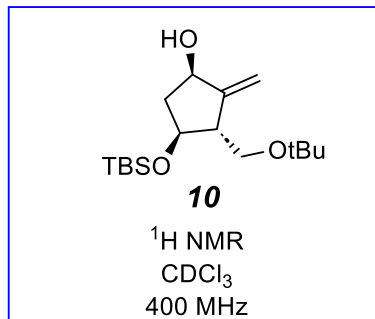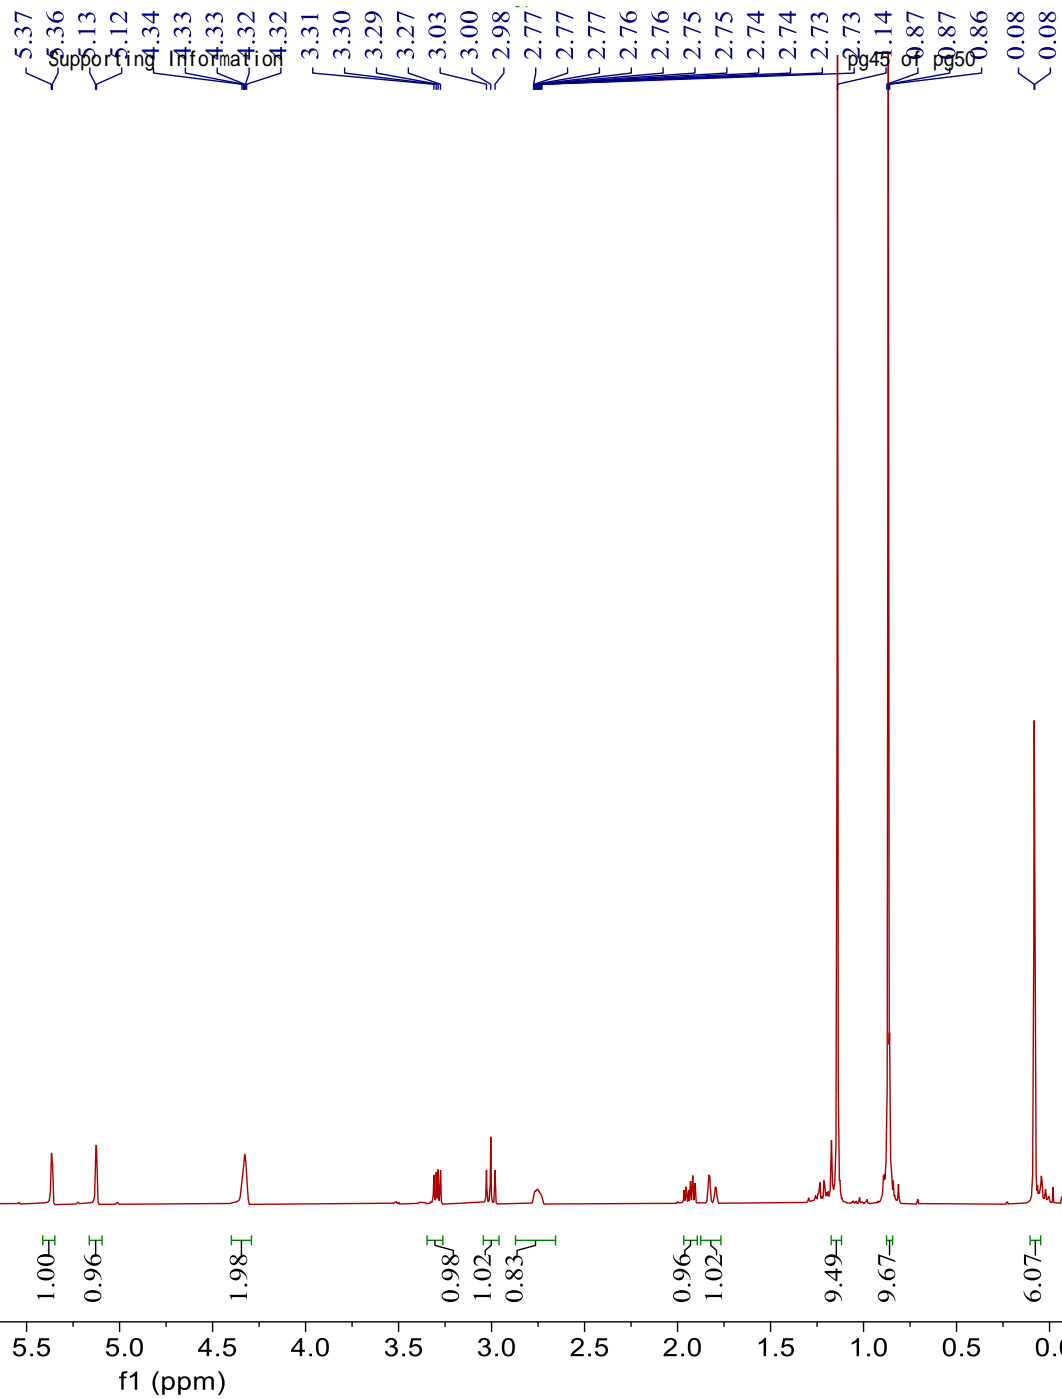

10/C

— 154.79

Supporting Information  
— 115.78

76.40

76.08

72.81

— 63.63

— 53.27

— 42.03

72.57

72.97

— 18.10

pg46 of pg50

74.66

74.75

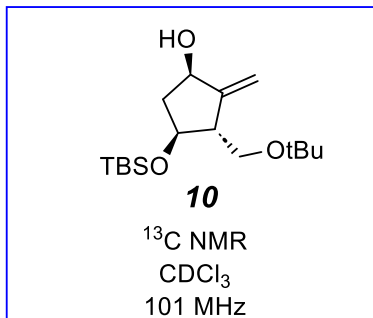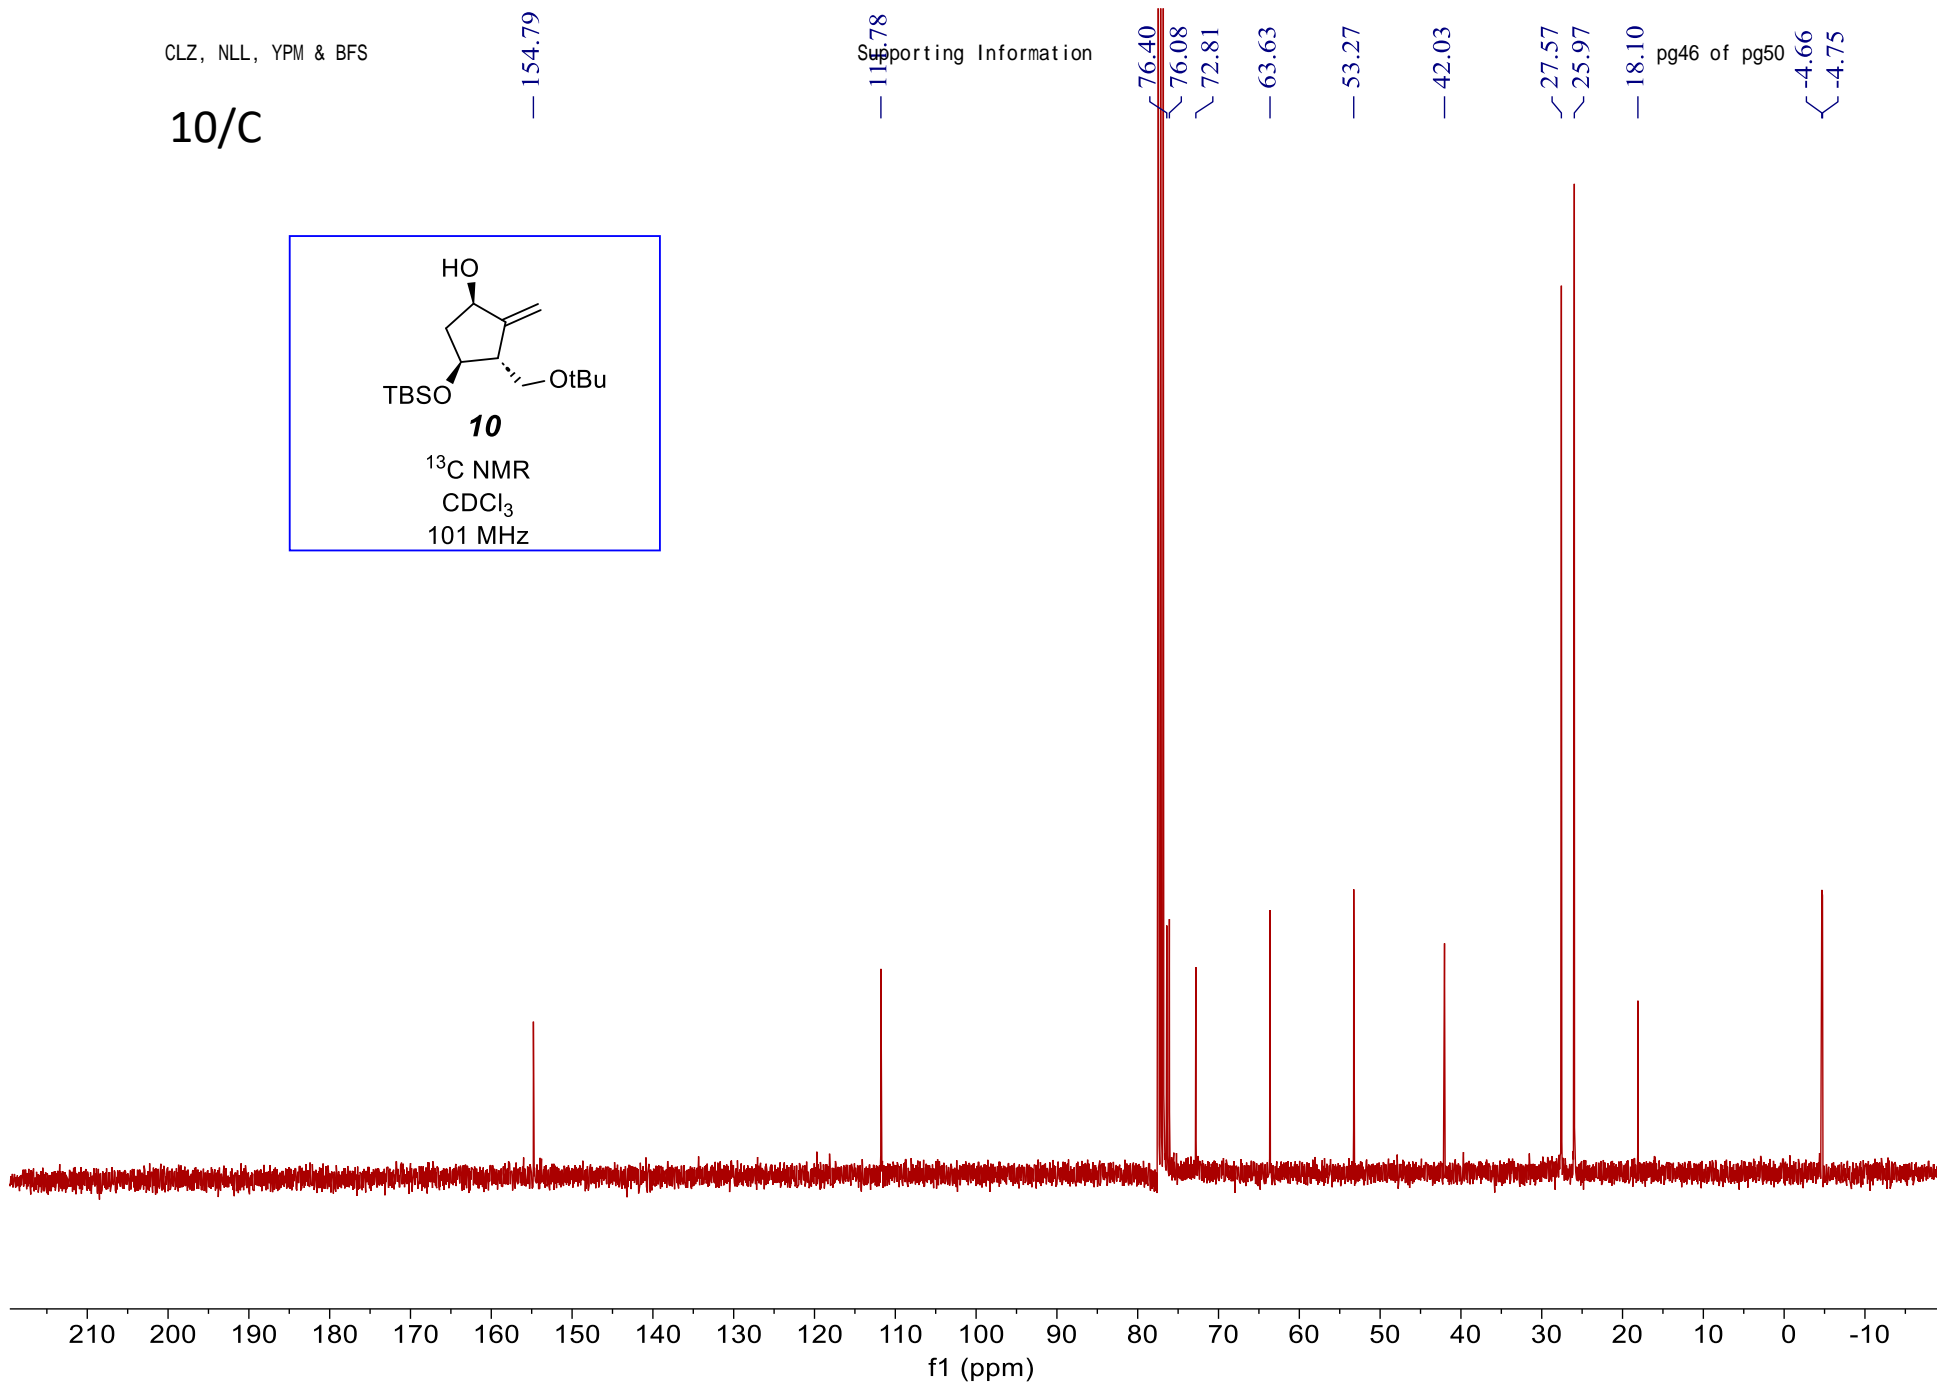

12/H

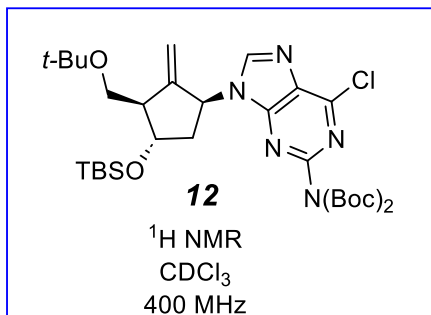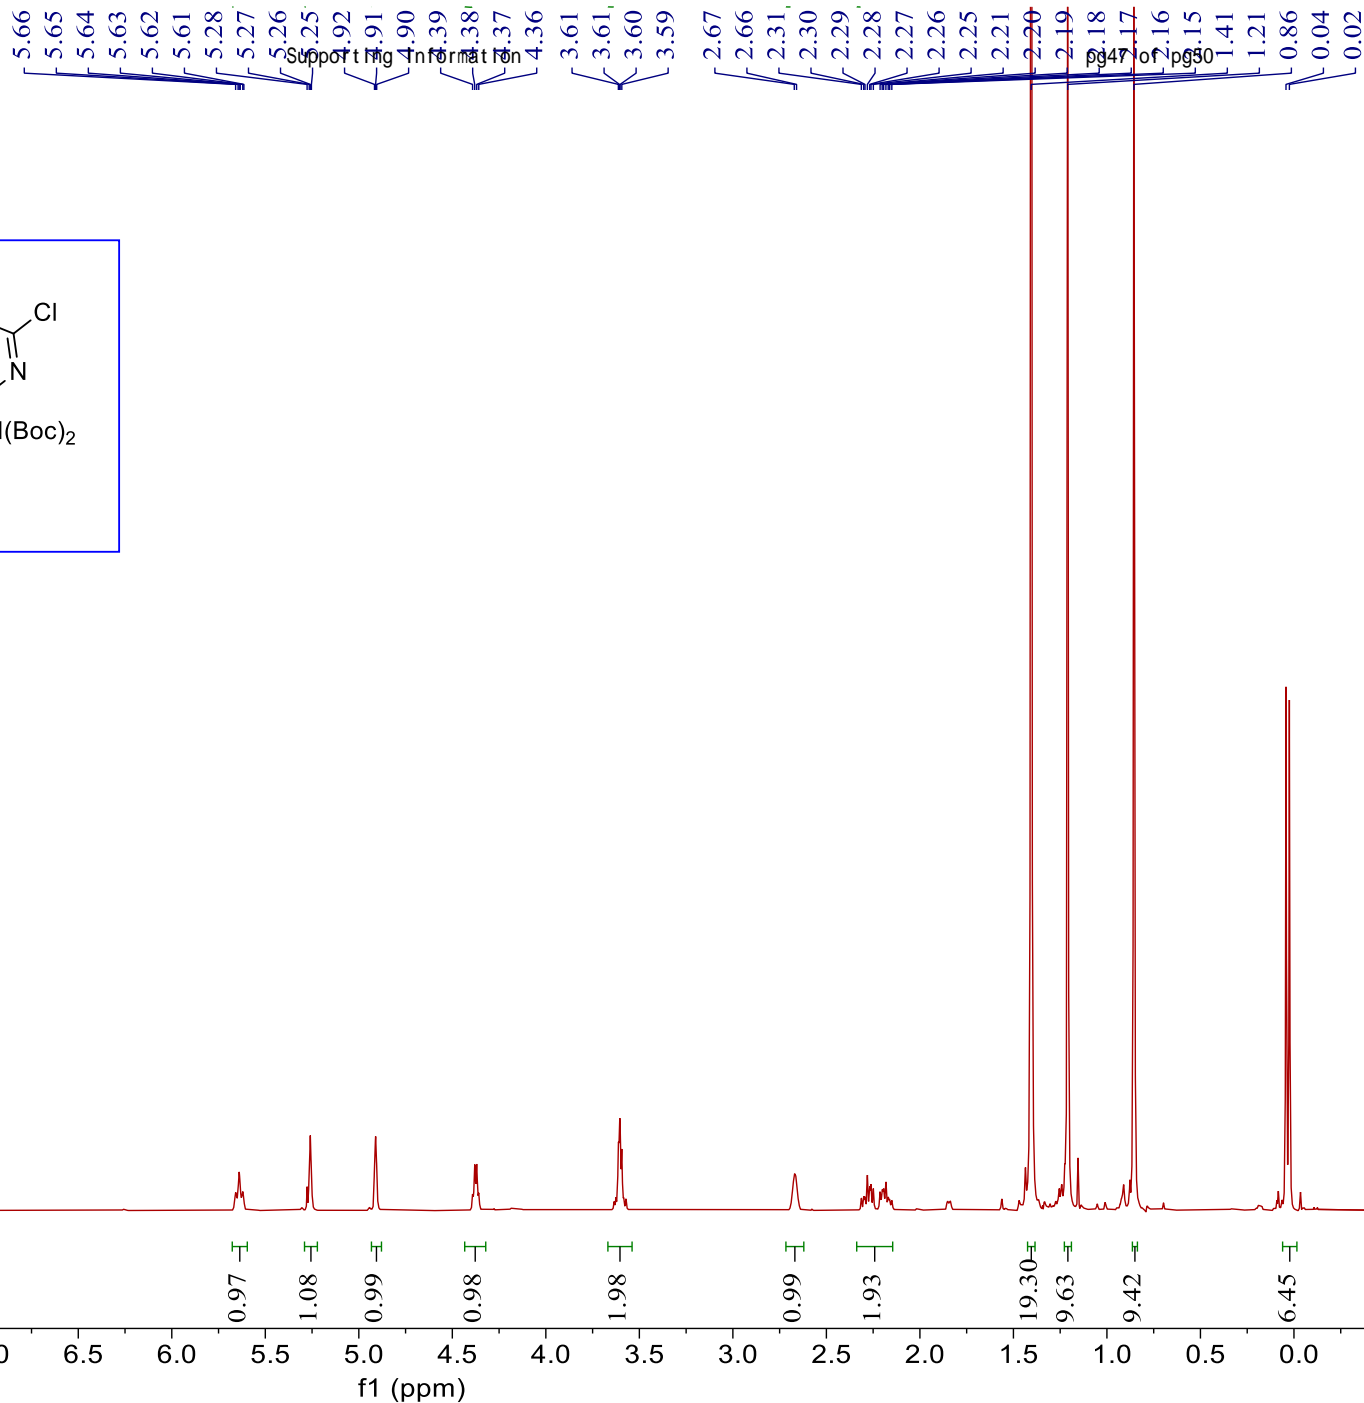

12/C

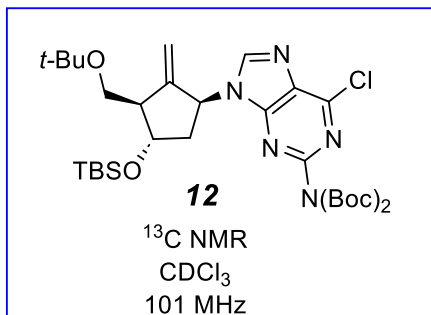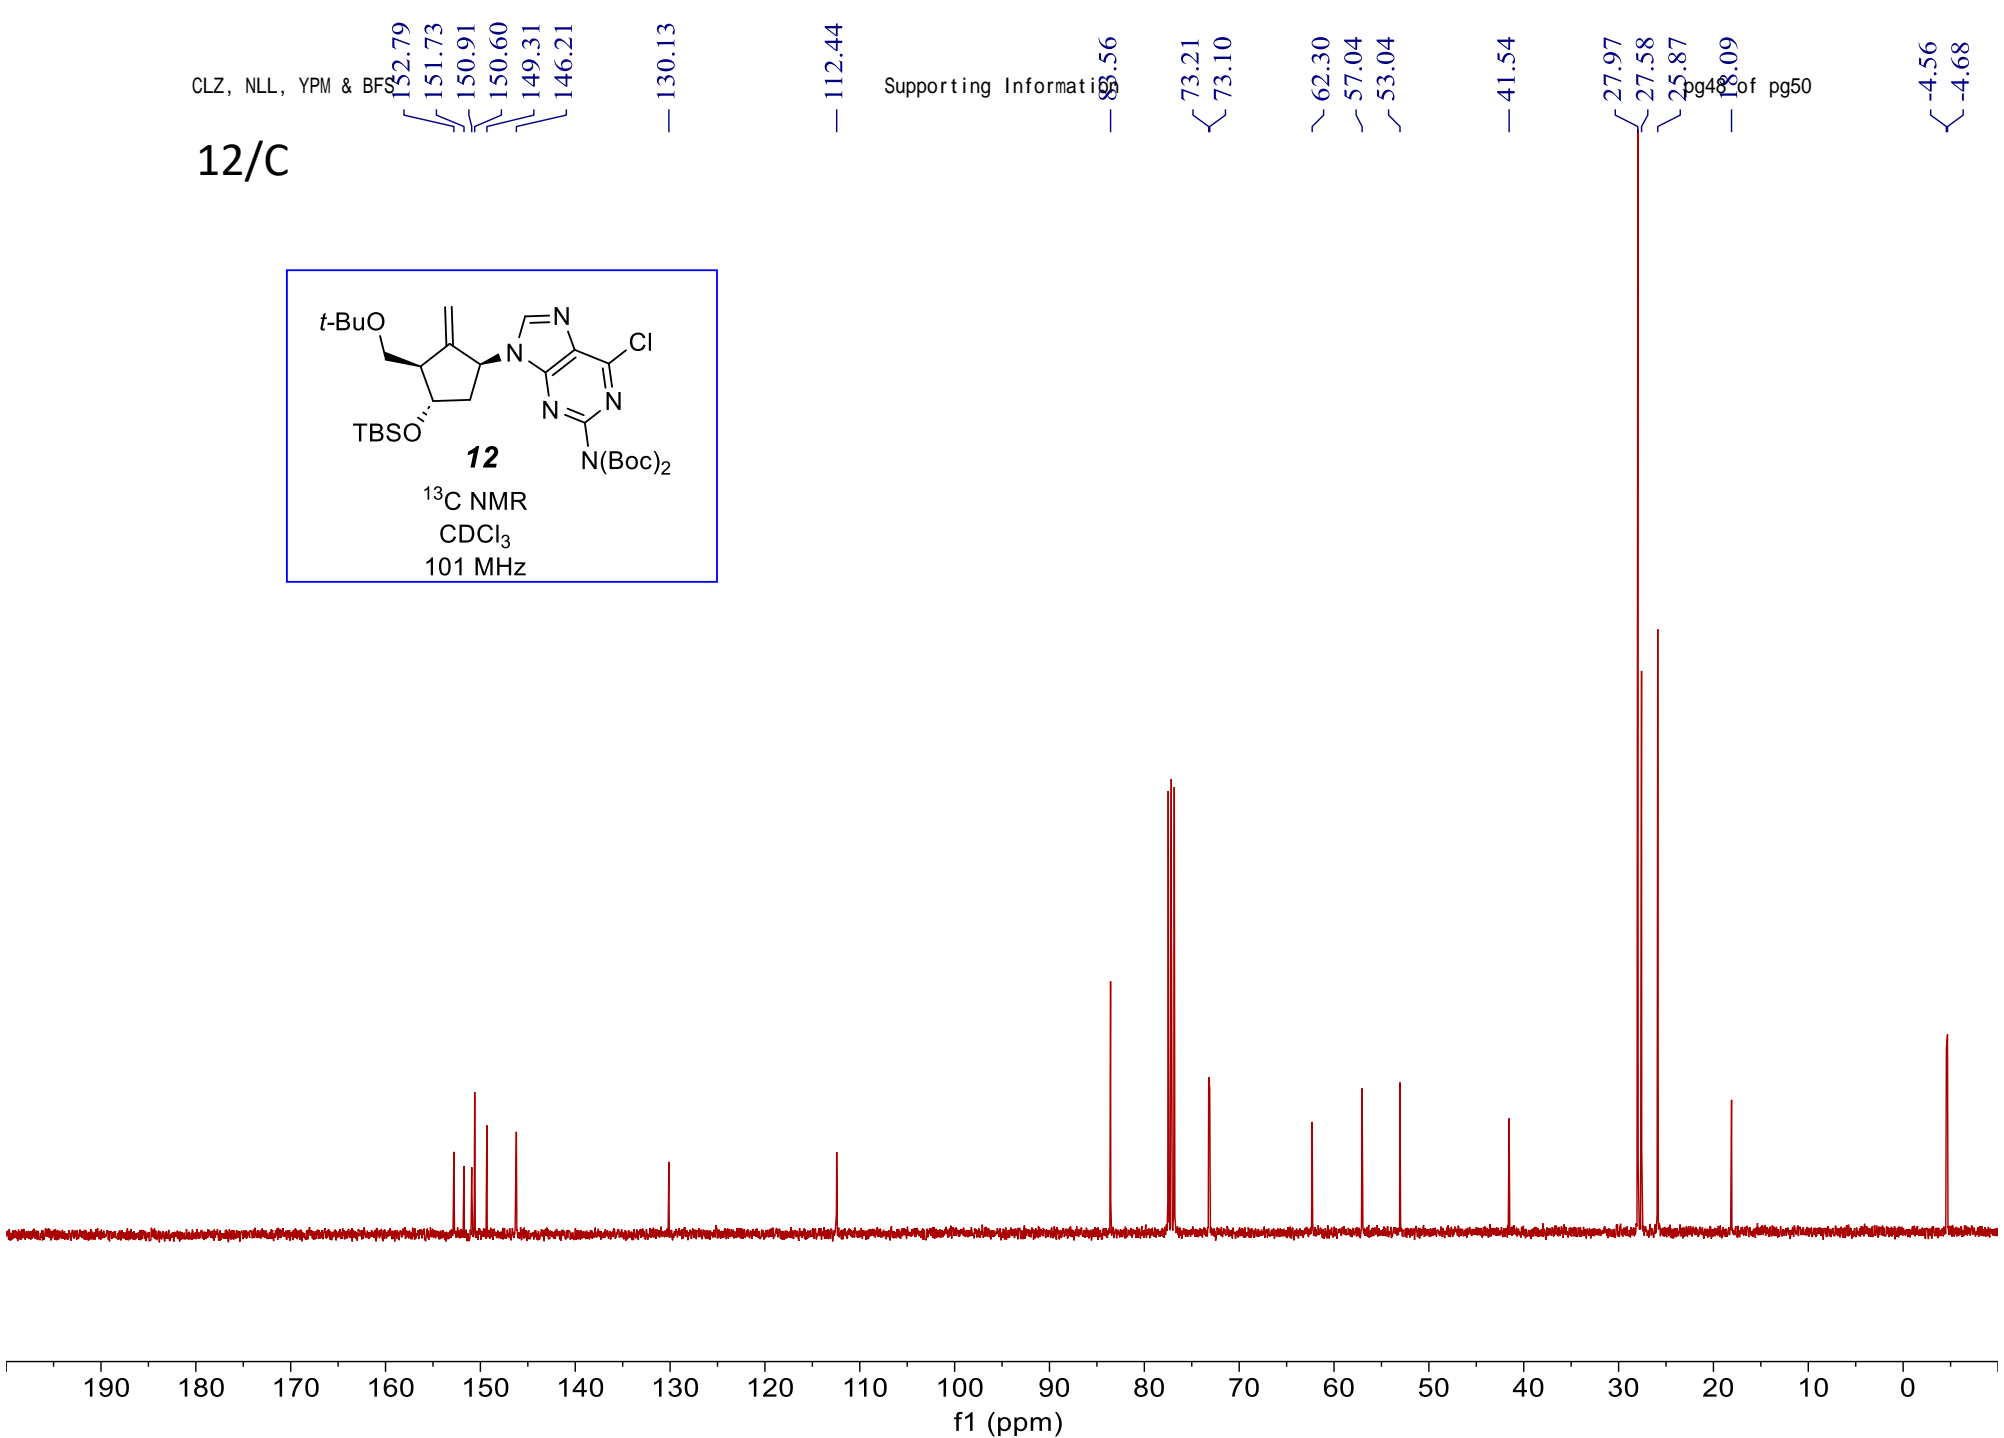



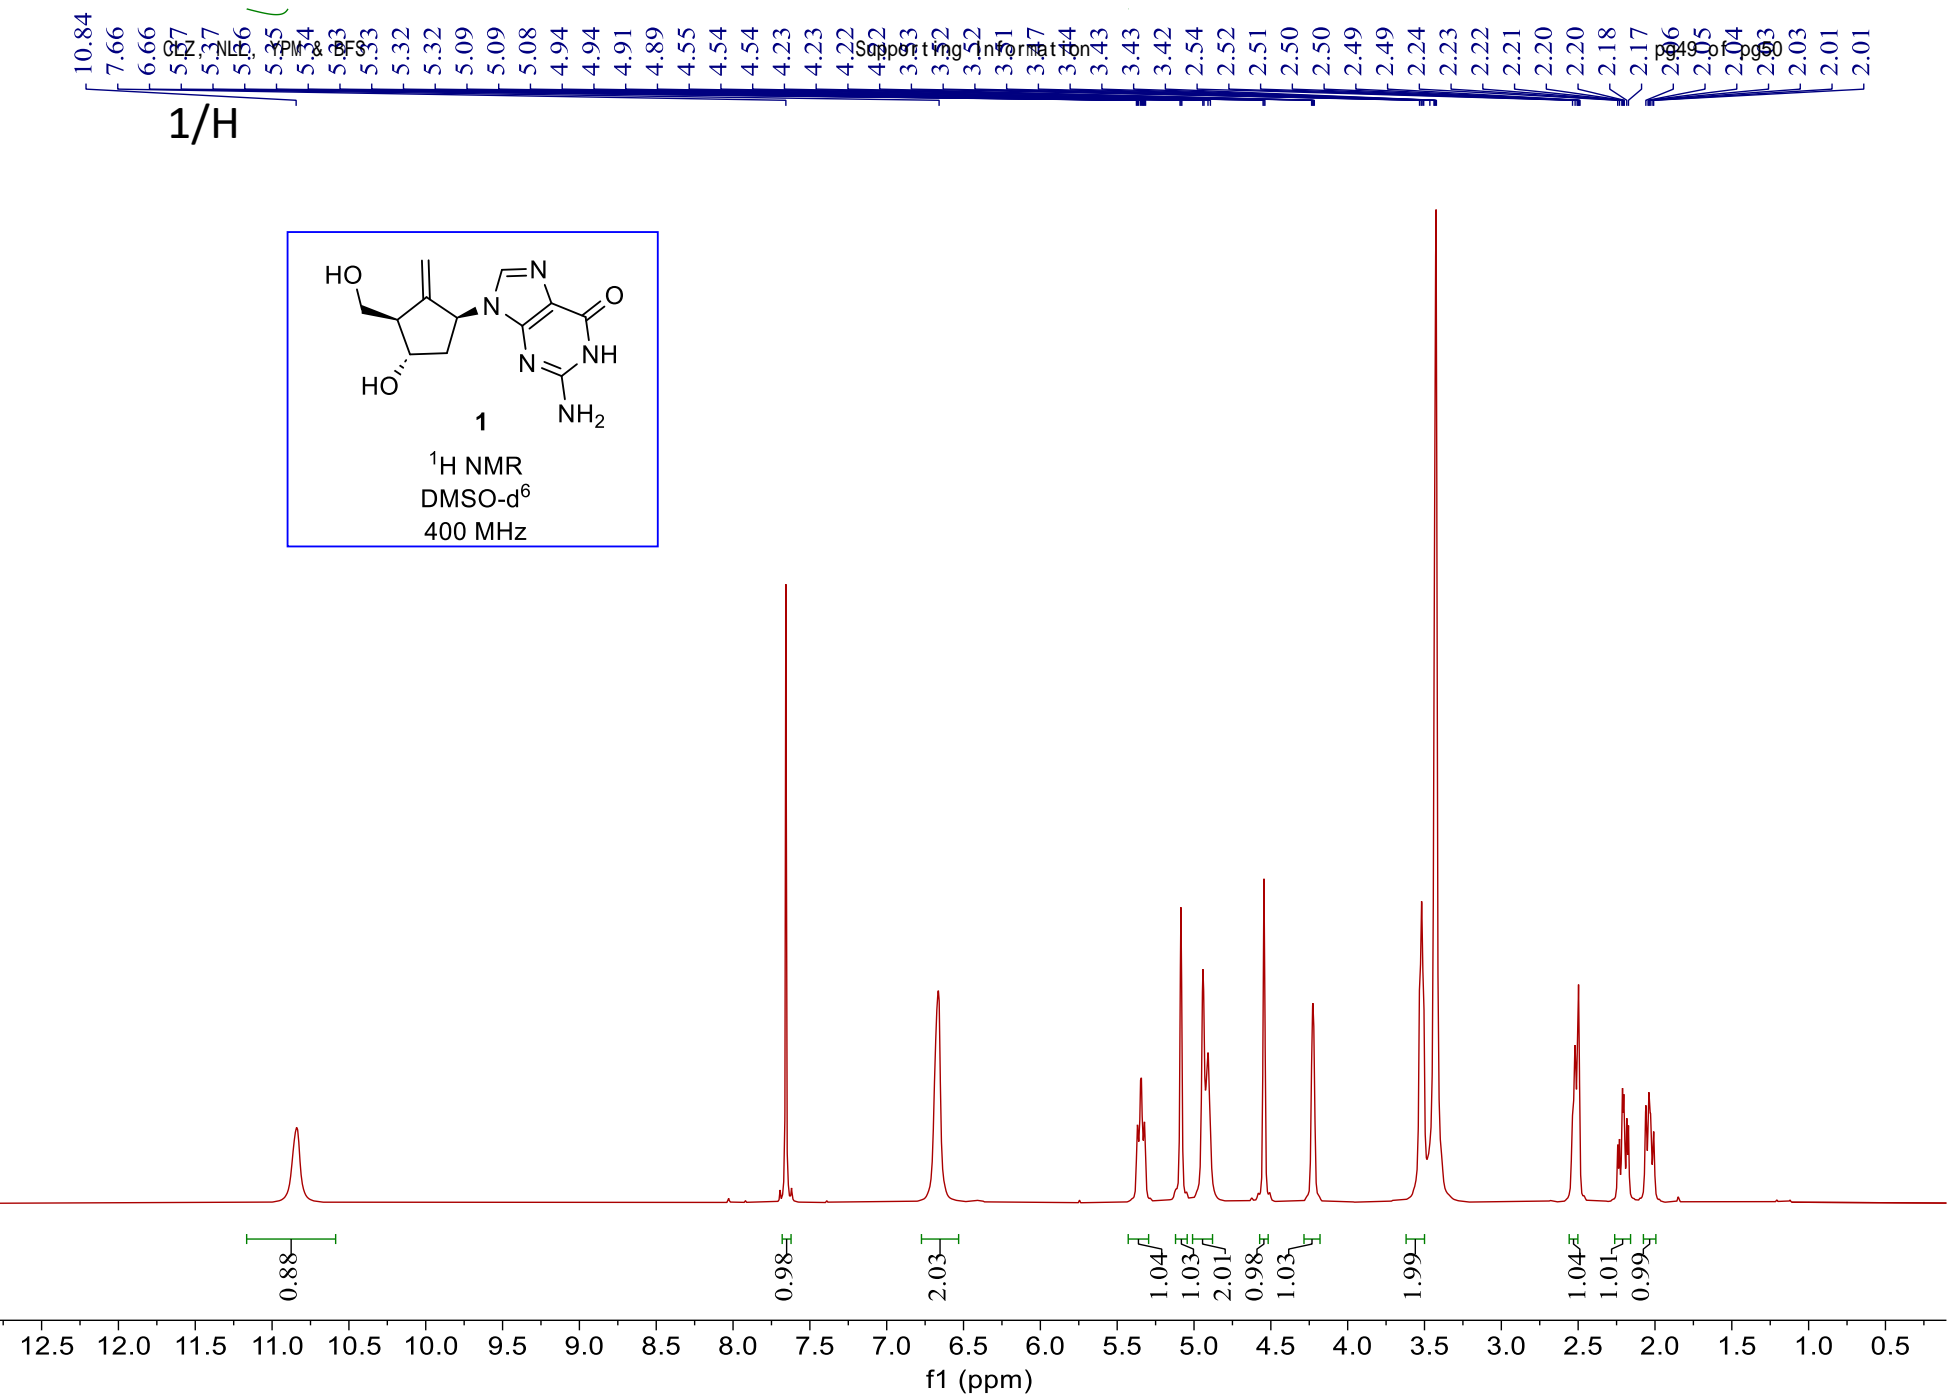

1/C

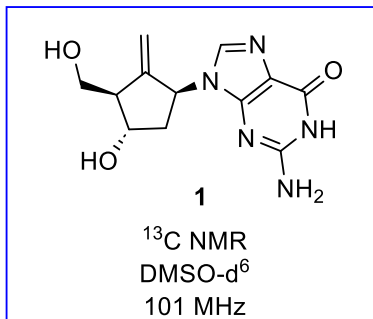156.93  
153.76  
151.47  
151.37

136.01

116.20

109.28

70.42

63.03

55.17

54.08

39.19

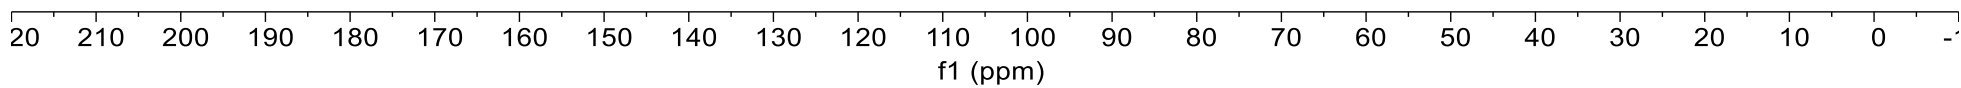

Supplement: d5qo00329f1.pdf [file d5qo00329f1.pdf]
